# Supplementary material
Source: Research Square preprint supplement (doi:10.21203/rs.3.rs-8924149/v1)
Supplement: Supplementary file 1 [file 0d2d5e2036ed42c052c47df8.docx]

**Supplementary Information**

**O-GlcNAcylation stabilizes OCA-B to sustain humoral immunity**

**Yu Ri Jung 1,2,*, Ki Myeong Na1,3,*, Liu Yue 1,2,*, Junghyun Lim 4,*, Mi-Ran Song1, Haeun Lee1, Heeyoun Hwang5, Kee K. Kim2*****, and Sung-Kyun Park1,3***

1Infectious Disease Research Center, Korea Research Institute of Bioscience and Biotechnology (KRIBB), Daejeon 34141, Republic of Korea

2Department of Biochemistry, College of Natural Sciences, Chungnam National University, Daejeon 34134, Republic of Korea

3Department of Functional Genomics, KRIBB School of Bioscience, Korea University of Science and Technology (UST), Daejeon 34113, Republic of Korea

4Department of Pharmacy, School of Pharmacy, Jeonbuk National University, Jeonju 54896, Republic of Korea

5Ochang Bio-Environment Research Center, Korea Basic Science Institute, Cheongju 28119, Republic of Korea

6Bio-Analytical School, Korea University of Science and Technology (UST), Daejeon 34113, Republic of Korea

*****These authors contributed equally to this work

*Corresponding author.

Lead contact: [skpark@kribb.re.kr](mailto:skpark@kribb.re.kr) (S.-K. Park)

**Cytokines**

**Thiamet G**

**OSMI-1**

**+**

**+**

**+**

**+**

**+**

**-**

**-**

**-**

**-**

**+**

**+**

**+**

**+**

**+**

**-**

**-**

**-**

**-**

**Fig. S1: *Irf4* and *Bcl6* transcript levels in cytokine-stimulated B cells under O-GlcNAc–modulating conditions**

Real-time RT-qPCR analysis of *Irf4* and *Bcl6* mRNA expression levels in naive B (CD43-CD11b-) cells. The cells were stimulated for 72 hours with CD40L, IL-4, and IL-21 in the presence or absence of O-GlcNAcylation inhibitors, including Thiamet G (OGA inhibitor) or OSMI-1 (OGT inhibitor). The results were normalized to *Gapdh.* Data are presented as mean ± S.D. from three independent experiments. Statistical significance was determined by a two-tailed Student’s t-test (ns: not significant, *: p < 0.05, **: p < 0.01, ***: p < 0.001).

**A**

**B**

**+**

**-**

**OSMI-1**

**O-GlcNAc**

**(RL2)**

**β-Actin**

**CH12F3-2A**


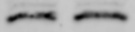

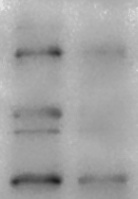


75

100

140

180

**+**

**-**

(kDa)

**OSMI-1**

45

**Fig. S2: Inhibition of O-GlcNAcylation by OGT inhibitor impairs the binding affinity of OCT-1 to the *IgH* gene promoter.**

**A** Representative western blot showing O-GlcNAc levels in CH12F3-2A cells treated with or without OSMI-1(OGT inhibitor). **B** ChIP-qPCR assay using α-OCT-1 antibody, showing changes in OCT-1 binding to the *IgH* gene promoter in CH12F3-2A cells. Quantitative data for the enrichment of OCT-1 at the *IgH* gene promoter are presented as the relative input ratio following normalization against the *Actg1* promoter region. Data are presented as mean ± S.D. from three independent experiments. Statistical significance was determined by a two-tailed Student’s t-test (ns: not significant, *: p < 0.05, **: p < 0.01, ***: p < 0.001).

180


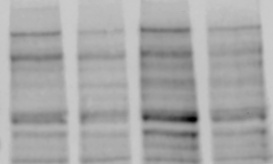

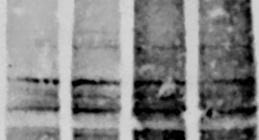

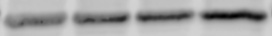

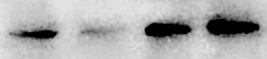

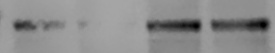


**O-GlcNAc**

**(RL2)**

**β-actin**

**CH12F3-2A**

75

100

**+**

**-**

(kDa)

**OSMI-1**

140

**Ubiquitin**

**OCT1**

**OCA-B**

180

75

100

140

100

35

**MG132**

**+**

**-**

**+**

**+**

**-**

**-**

45

**Fig. S3: Proteasome inhibition prevents O-GlcNAc–dependent loss of OCT-1 and OCA-B in CH12F3-2A cells**

Representative immunoblot showing O-GlcNAc, ubiquitin, OCT-1, and OCA-B protein levels in CH12F3-2A cells treated with or without the OGT inhibitor OSMI-1, in the presence or absence of the proteasome inhibitor MG132. Accumulation of ubiquitinated proteins was assessed to verify effective proteasome inhibition by MG132. These data support the involvement of proteasome-dependent degradation in the reduction of OCT-1 and OCA-B under O-GlcNAc–inhibited conditions.


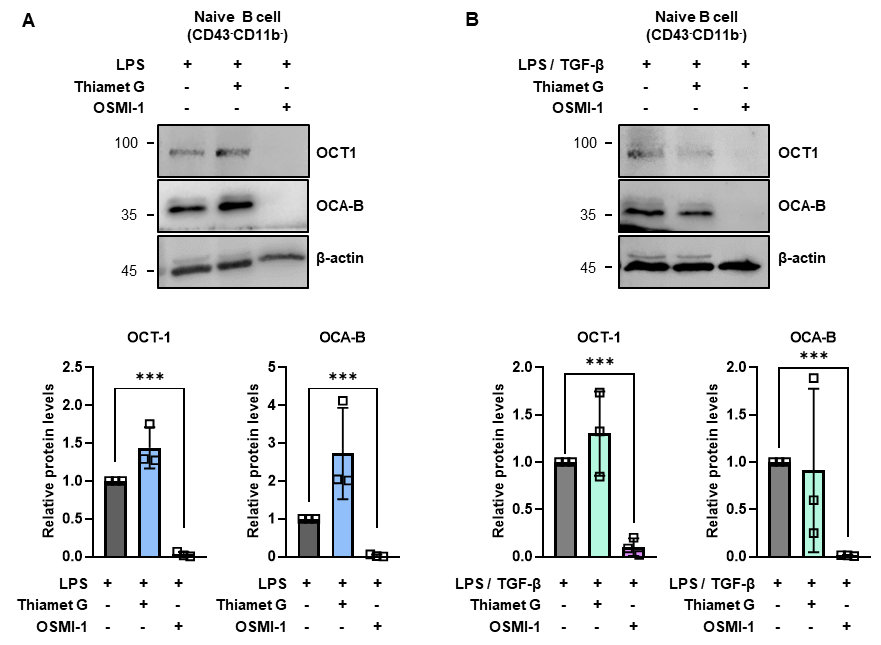


**Fig. S4: O-GlcNAcylation maintains OCT-1 and OCA-B protein levels in activated primary B cells**

**A** Representative immunoblot showing OCT-1 and OCA-B protein expression levels in naive splenic B cells (CD43⁻CD11b⁻) stimulated with LPS for 72 h in the presence or absence of O-GlcNAcylation-modulating compounds, including Thiamet G (OGA inhibitor) or OSMI-1 (OGT inhibitor). Quantification of relative band intensities is shown below. **B** Representative immunoblot showing OCT-1 and OCA-B protein expression levels in naïve splenic B cells stimulated with LPS and TGF-β for 72 h under the same treatment conditions as in (A). Quantification of relative band intensities is shown below. β-actin was used as a loading control for normalization. Data are presented as mean ± S.D. from three independent experiments. Statistical significance was determined by a two-tailed Student’s *t*-test (ns: not significant, *: p < 0.05, **: p < 0.01, ***: p < 0.001).


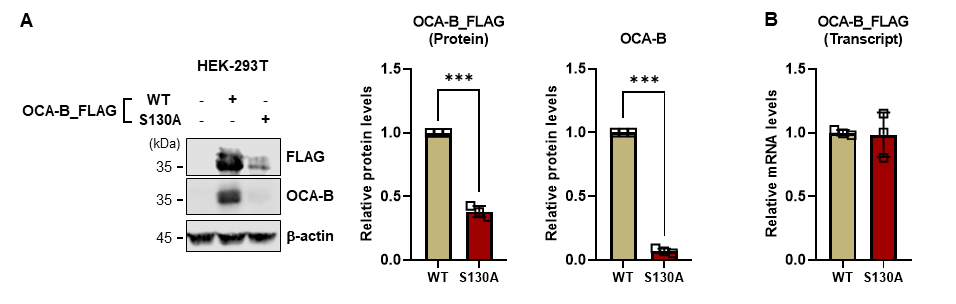


**Fig. S5: OCA-B S130A mutation reduces protein abundance without affecting transcript levels in HEK293T cells**

**A** Representative immunoblot showing overexpressed FLAG-tagged OCA-B wild-type (WT) or S130A mutant proteins in HEK293T cells. Quantification of relative band intensities is shown on the right. **B** Real-time RT–qPCR analysis of FLAG-tagged OCA-B–specific mRNA expression levels in HEK293T cells transfected with WT or S130A constructs. Transcript levels were normalized to *Gapdh*. All data are presented as mean ± S.D. from three independent experiments. Statistical significance was determined by a two-tailed Student’s t-test (ns: not significant, *: p < 0.05, **: p < 0.01, ***: p < 0.001).


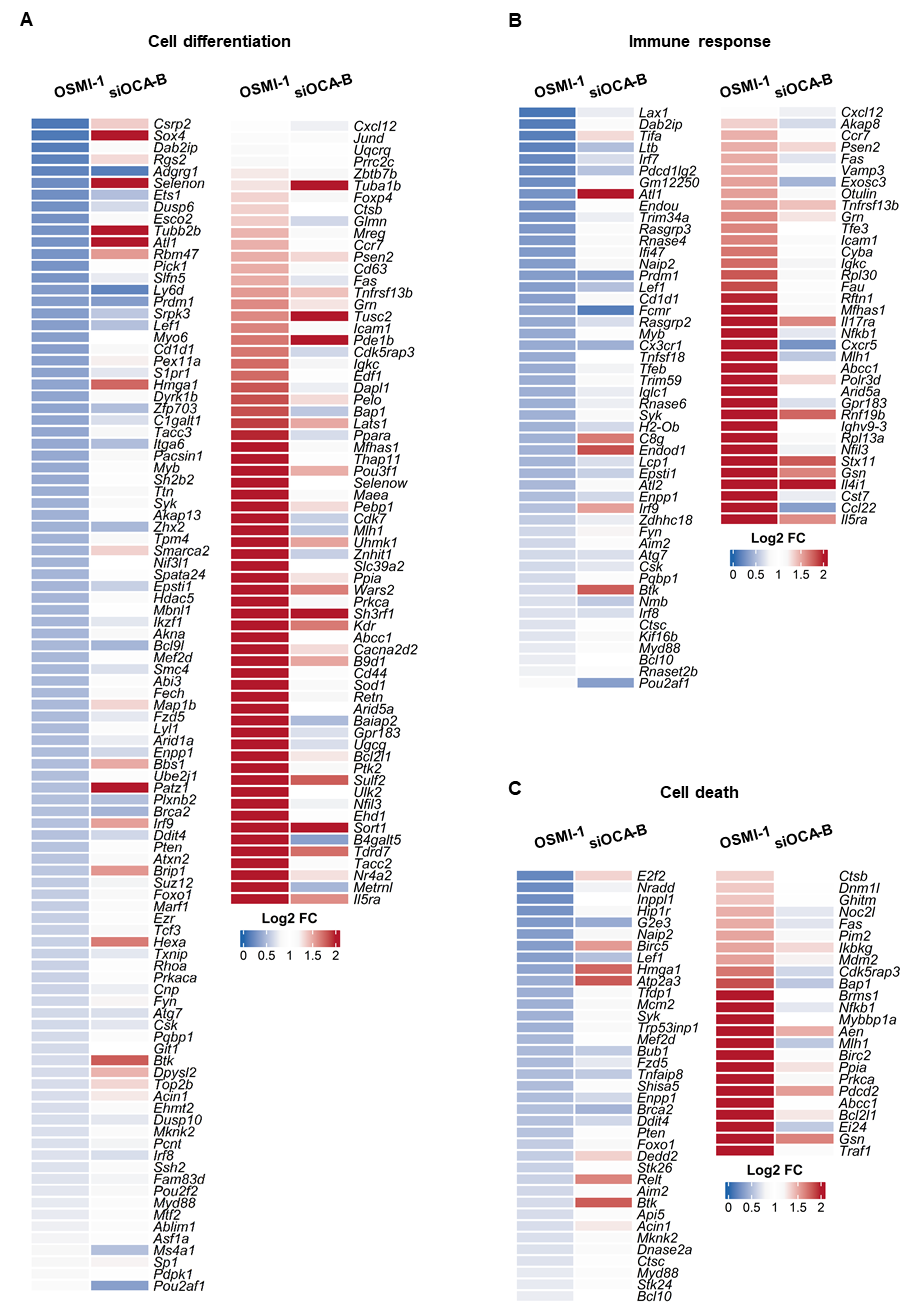


**Fig. S6: Shared transcriptional programs downregulated by O-GlcNAc inhibition and OCA-B depletion**

**A-C** Heatmaps showing representative genes across selected biological programs that are commonly regulated in both OSMI-1–treated and siOCA-B–transfected B cells. Relative gene expression levels are displayed as log2 fold changes (log2 FC) compared with the corresponding control conditions (DMSO or siNC). The color scale indicates relative upregulation (red) or downregulation (blue).


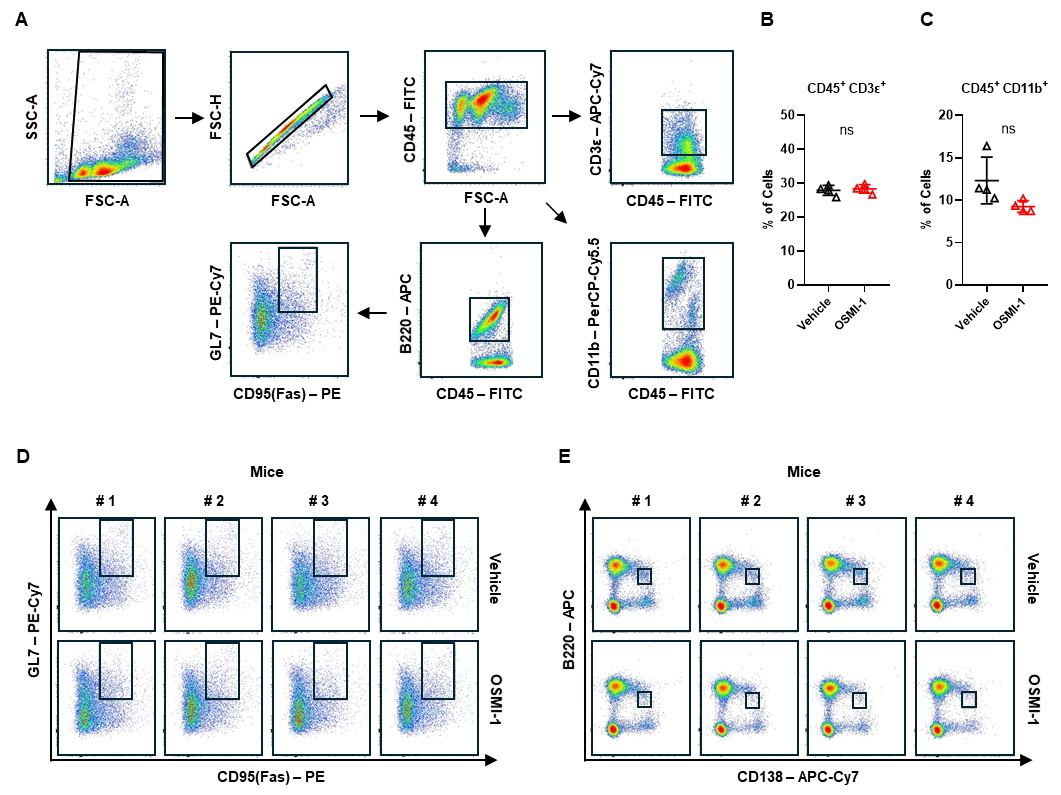


**Fig. S7: Flow cytometric gating strategies and representative plots for splenic immune cell subsets**

**A** Gating strategy used to identify major splenic immune cell populations. Total splenocytes were sequentially gated for singlets (FSC-H vs. FSC-A), CD45⁺ leukocytes, and subsequently subdivided into T cells (CD45⁺CD3ε⁺), myeloid-enriched cells (CD45⁺CD11b⁺), and B-cell subsets based on the indicated surface markers. **B, C** Flow cytometric quantification of major splenic immune populations. Shown are the percentages of CD45⁺CD3ε⁺ T cells (**B**) and CD45⁺CD11b⁺ myeloid-enriched cells (**C**) within total splenocytes. Data are presented as mean ± S.D. Statistical significance was determined by a two-tailed Student’s t-test (ns: not significant, *: p < 0.05, **: p < 0.01, ***: p < 0.001). **D** Representative flow cytometric plots identifying germinal center (GC) B cells. Splenocytes were stained for B220, GL7, and CD95 (Fas), and GC B cells were defined as B220⁺GL7⁺CD95⁺. Individual plots from four representative mice per group (#1–#4) are shown. These data correspond to the quantification presented in Fig. 7J. **E** Representative flow cytometric plots identifying plasma cells. Splenocytes were stained for B220 and CD138, and plasma cells were defined as B220lowCD138⁺. Individual plots from four representative mice per group (#1–#4) are shown. These data correspond to the quantification presented in Fig. 7K.
