# Supplementary material
Source: Research Square preprint supplement (doi:10.21203/rs.3.rs-8924149/v1)
Supplement: Supplementary file 2 [file 1a7f09aef5e10457ebc36e98.docx]

**O-GlcNAcylation stabilizes OCA-B to sustain humoral immunity**

**Yu Ri Jung 1,2,*, Ki Myeong Na1,3,*, Liu Yue 1,2,*, Junghyun Lim 4,*, Mi-Ran Song1, Haeun Lee1, Heeyoun Hwang5, Kee K. Kim2*****, and Sung-Kyun Park1,3***

1Infectious Disease Research Center, Korea Research Institute of Bioscience and Biotechnology (KRIBB), Daejeon 34141, Republic of Korea

2Department of Biochemistry, College of Natural Sciences, Chungnam National University, Daejeon 34134, Republic of Korea

3Department of Functional Genomics, KRIBB School of Bioscience, Korea University of Science and Technology (UST), Daejeon 34113, Republic of Korea

4Department of Pharmacy, School of Pharmacy and Institute of New Drug Development, Jeonbuk National University, Jeonju 54907, Republic of Korea

5Ochang Bio-Environment Research Center, Korea Basic Science Institute, Cheongju 28119, Republic of Korea

6Bio-Analytical School, Korea University of Science and Technology (UST), Daejeon 34113, Republic of Korea

*****These authors contributed equally to this work

*Corresponding author.

Lead contact: [skpark@kribb.re.kr](mailto:skpark@kribb.re.kr) (S.-K. Park)

**Running title: O-GlcNAc regulation of OCA-B and B-cell fate**

**ABSTRACT**

Protein O-GlcNAcylation is a nutrient-sensitive post-translational modification implicated in immune regulation, yet its role in humoral immunity is poorly defined. Here we show that O-GlcNAcylation is required for effective antibody production downstream of B-cell activation. Pharmacologic inhibition of O-GlcNAc transferase markedly reduced immunoglobulin secretion across T cell–dependent and T cell–independent stimulation conditions. This defect was associated with impaired accumulation of activated B cells, reflecting both diminished expansion and increased cell death, as well as suppression of plasmablast-associated transcriptional programs including BLIMP1 and IRF4. Class-switch–associated germline transcription was largely preserved, whereas productive expression of immunoglobulin transcripts and secreted antibodies was substantially reduced, indicating a failure to sustain high-output antibody production. Mechanistically, O-GlcNAcylation stabilized the transcriptional regulators OCT-1 and OCA-B by preventing proteasome-dependent degradation. Mutation of a predicted O-GlcNAc site on OCA-B reduced protein stability, and OCA-B depletion recapitulated key defects in differentiation-linked antibody output. Transcriptomic analyses revealed substantial overlap between gene programs affected by O-GlcNAc inhibition and OCA-B loss, alongside additional OCA-B–independent changes. In vivo, systemic OGT inhibition diminished antigen-specific antibody responses, reduced germinal center and plasma cell populations, and lowered OCT-1 and OCA-B protein abundance without broadly depleting lymphocytes. These findings identify O-GlcNAcylation as a metabolic regulatory layer that sustains humoral immunity by stabilizing transcriptional programs required for differentiation into antibody-secreting cells.

**INTRODUCTION**

The generation of protective antibodies is a defining feature of adaptive immunity. Following antigen encounter, B cells undergo activation, clonal expansion, and differentiation into germinal center (GC) B cells and antibody-secreting plasma cells (1, 2). Within the GC, iterative cycles of proliferation, somatic hypermutation, and affinity-based selection yield high-affinity antibodies that provide durable immune protection. This process lies at the heart of vaccine-induced immunity, and defects in B-cell activation or antibody synthesis can severely compromise immune defense (3, 4). Thus, understanding how the metabolic state of B cells governs antibody production remains a central question in immunology.

Beyond genetic and signaling cues, nutritional status profoundly influences humoral immunity. Malnutrition, nutrient restriction, and metabolic stress are associated with impaired vaccine responses and reduced antibody titers across multiple clinical contexts (5-7). Epidemiological studies consistently reveal that nutrient deprivation leads to poor seroconversion after vaccination, diminished germinal center formation, and compromised antibody longevity (6, 8). However, despite strong epidemiological and experimental links between nutritional deprivation and impaired humoral responses, the proximal, cell-intrinsic mechanism by which nutrient availability is encoded into the immunoglobulin transcriptional and differentiation machinery remains poorly defined. In particular, it is unclear how systemic metabolic inputs are translated into stability and activity changes in lineage-defining transcriptional modules that gate class switching and antibody-secreting cell differentiation.

Recent years have brought increasing appreciation of the metabolic wiring of B cells, revealing that energy flux and biosynthetic capacity shape antibody responses. Glycolysis, oxidative phosphorylation, and amino-acid metabolism all change dynamically as B cells transition from naïve to activated and plasma-cell states (9-11). Upon antigen encounter, B cells rapidly up-regulate glycolysis to fuel biosynthetic demands associated with clonal expansion and immunoglobulin synthesis, providing ATP and intermediates for nucleotide and lipid production. In parallel, mitochondrial oxidative phosphorylation (OXPHOS) is enhanced to sustain energy supply and redox balance, particularly in germinal center and memory B cells, where mitochondrial fitness supports survival and antibody affinity maturation. Furthermore, amino-acid metabolism, including glutamine and serine catabolism, supplies carbon and nitrogen for anabolic reactions and epigenetic cofactors, while also maintaining mTORC1 signaling and unfolded-protein-response capacity critical for plasma-cell differentiation.

Among nutrient-sensing pathways, protein O-GlcNAcylation has emerged as a particularly versatile regulator that integrates glucose, amino-acid, and lipid metabolism with cellular signaling and transcriptional control. O-GlcNAcylation is the reversible attachment of O-linked N-acetylglucosamine to serine/threonine residues, catalyzed by O-GlcNAc transferase (OGT) and removed by O-GlcNAcase (OGA). Because the donor substrate UDP-GlcNAc derives from the hexosamine biosynthetic pathway, which integrates inputs from glucose, glutamine, acetyl-CoA, and nucleotide metabolism, O-GlcNAc functions as a nutrient and stress sensor that dynamically couples metabolic flux to protein stability and gene expression (12-14).

In the immune system, O-GlcNAcylation acts as a central metabolic integrator that fine-tunes immune activation and effector function. Notably, lymphocyte activation itself can be accompanied by a rapid increase in global O-GlcNAc levels (15-17), consistent with the concept that O-GlcNAc is dynamically tuned during immune stimulation. In T cells, O-GlcNAc modification of signaling intermediates such as LCK and NFAT supports early activation, calcium signaling, and IL-2 transcription (18). At the transcriptional level, O-GlcNAcylation stabilizes and enhances the activity of NF-κB subunits (p65/RelA), promoting cytokine gene expression and survival signaling downstream of antigen receptor engagement (19). Genetic manipulation of OGT enhances NK cell–mediated cytotoxicity *in vivo* by stabilizing O-GlcNAcylation, demonstrating that O-GlcNAc regulatory pathways can modulate innate lymphocyte function (17). Beyond these cell-specific examples, systemic analyses have established that O-GlcNAc integrates metabolic inputs with immune effector programs across multiple leukocyte subsets, positioning it as a nutrient-sensitive regulator of inflammation and adaptive immunity (20).

In B cells, emerging evidence suggests that O-GlcNAcylation is indispensable for normal development and antibody responses. Conditional deletion of *Ogt* in B cells impairs humoral immunity by disrupting both signaling and survival pathways. Loss of O-GlcNAcylation diminishes B-cell receptor (BCR) signaling through defective modification of the Src-family kinase Lyn, leading to attenuated calcium mobilization and reduced activation. In parallel, *Ogt*-deficient B cells fail to maintain germinal-center and memory B-cell populations, resulting in defective antibody production and markedly reduced serum immunoglobulin levels (16, 21). Elevation of O-GlcNAcylation promotes pre-B-cell proliferation via c-Myc activation (22), and recent work demonstrated that O-GlcNAcylation modulates long-range chromatin architecture and V(D)J recombination at the IgH locus (23). These studies collectively underscore O-GlcNAc as a central immunometabolic regulatory node that coordinates metabolic input with B-cell fate and antibody output. However, direct evidence linking O-GlcNAcylation to productive immunoglobulin gene transcription following activation and class switching or to B-cell activation programs, as well as clear mechanistic insight into the molecular pathways that mediate this coupling, remains limited.

Here, we set out to define how O-GlcNAcylation regulates antibody production in activated B cells. Using defined *ex vivo* and *in vivo* models, we show that inhibition of O-GlcNAcylation markedly reduces both unswitched and class-switched antibody secretion across multiple activation contexts. This impairment reflects defects evident at the level of immunoglobulin gene transcription and is accompanied by disrupted activation- and differentiation-associated transcriptional programs required for effective antibody production. Mechanistically, we identify the octamer transcriptional module, comprising POU domain transcription factors OCT-1 (*POU2F1*) and the B cell–specific co-activator OCA-B (*POU2AF1*; also known as OBF-1/Bob-1), as a metabolically sensitive regulatory axis. OCA-B is a well-established amplifier of immunoglobulin gene transcription and a key regulator of B-cell differentiation and germinal center responses (24-26). Our data demonstrate that O-GlcNAcylation is required to maintain OCT-1 and OCA-B protein stability without altering their mRNA expression and identify a critical O-GlcNAc site within OCA-B that governs its abundance. Transcriptomic analyses further reveal substantial overlap between gene expression programs disrupted by O-GlcNAc inhibition and OCA-B depletion, particularly within pathways controlling B-cell activation, differentiation, and effector function. Together, these findings support a model in which O-GlcNAcylation functions as a nutrient-sensitive regulatory layer that constrains B cell activation and antibody output, in part through stabilization of OCA-B and the octamer transcriptional module. By uncovering O-GlcNAc–dependent control of a lineage-defining B-cell transcriptional axis, this work provides a mechanistic framework for understanding how metabolic state shapes humoral immunity and vaccine responsiveness.

**RESULTS**

**O-GlcNAcylation supports antibody production downstream of B cell activation**

To determine whether O-GlcNAcylation directly regulates antibody production in activated B cells, we first examined antibody secretion under defined *in vitro* stimulation conditions that recapitulate physiological B-cell activation and class-switch recombination. Primary naive B cells (CD43-CD11b-) from mouse spleen were stimulated with CD40 ligand, IL-4, and IL-21, a combination that mimics T cell–derived signals and robustly induces B-cell proliferation, class switching, and antibody secretion. Pharmacologic inhibition of O-GlcNAc transferase (OGT) with OSMI-1 effectively suppressed global O-GlcNAcylation (Fig. 1A), which was accompanied by a pronounced reduction in the secretion of both IgM and class-switched IgG1 (Fig. 1B). In contrast, pharmacologic inhibition of O-GlcNAcase (OGA) with Thiamet G markedly increased global O-GlcNAcylation but had minimal impact on antibody secretion (Fig. 1A, B), suggesting that antibody output may already be operating near a functional saturation point with respect to O-GlcNAc levels. These findings indicate that O-GlcNAcylation is required to maintain efficient antibody output during B-cell responses that model T cell–dependent activation. Notably, O-GlcNAc dependence was not restricted to T cell–dependent-like stimulation. Triggering Toll-like receptor 4 with lipopolysaccharide (LPS), a canonical driver of T cell–independent antibody production, similarly revealed a strong requirement for O-GlcNAc cycling, as OGT inhibition resulted in a substantial decrease in IgM secretion (Fig. 1C, D). Extending this analysis to switching conditions, LPS plus TGF-β stimulation demonstrated that O-GlcNAc inhibition reduced both IgA and residual unswitched IgM production (Fig. 1E, F). Collectively, these results identify O-GlcNAcylation as a core, B cell–intrinsic determinant of antibody secretory output across multiple activation modalities, motivating subsequent mechanistic dissection of the transcriptional or differentiation programs that couple O-GlcNAc cycling to effector antibody production.

To begin dissecting the cellular processes underlying the reduced antibody output, we first assessed the overall expansion of primary B cells following stimulation with CD40L, IL-4, and IL-21. Under these conditions, inhibition of O-GlcNAcylation resulted in an approximately 70% reduction in the number of viable cells recovered after stimulation, indicating a profound defect in B cell accumulation during activation. (Fig. 2A, B). Consistent with our previous work identifying O-GlcNAcylation as a critical regulator of early B-cell growth control (22), cytokine stimulation robustly induced c-Myc protein expression, whereas OGT inhibition markedly attenuated this induction (Fig. 2B, C). This was accompanied by reduced expression of downstream cell-cycle–associated regulators, including Cyclin A2 (Fig. 2D). In contrast, pharmacologic inhibition of OGA with Thiamet G had minimal impact on B cell accumulation, c-Myc induction or cyclin expression under the same conditions (Fig. 2A-C). Together, these data indicate that O-GlcNAcylation supports the expansion of activated B cells, at least in part through sustaining c-Myc–associated growth programs, while not excluding additional contributions from impaired cell survival. However, reduced cell numbers alone did not fully account for the observed defect in antibody secretion. While the decrease in unswitched IgM production was broadly proportional to the reduction in viable B cells, the suppression of class-switched IgG1 secretion exceeded what would be predicted from cell loss alone (Fig. 1B and 2A), suggesting an additional defect in differentiation-linked antibody production. To directly assess whether class-switch recombination (CSR) was compromised, we quantified germline and post-switch immunoglobulin transcripts (Fig. 2E). Under O-GlcNAc–inhibited conditions, germline transcription from the IgG1 locus was largely preserved, indicating that activation of the Iγ1 promoter or accessibility of the switch region might be retained (Fig. 2E, F). In contrast, post-CSR IgG1 transcripts were markedly reduced (Fig. 2E, G), in agreement with the reduced IgG1 protein secretion observed in Figure 1B. Notably, transcription of unswitched IgM was also decreased, albeit to a lesser extent than post-switch IgG1 (Fig. 2E, H), indicating that O-GlcNAcylation broadly supports productive immunoglobulin gene expression rather than simply dictating the choice of isotype. A similar pattern was observed at the IgE locus under CD40L, IL-4, and IL-21 stimulation. Germline ε transcription was unchanged or modestly increased (Fig. 2E, I), whereas post-CSR IgE transcripts were strongly reduced (Fig. 2E, J), accompanied by a corresponding decrease in secreted IgE (Fig. 2K). Together, these data indicate that O-GlcNAcylation is not the dominant determinant of germline transcription under these conditions, but is required to sustain efficient transcriptional output from switched immunoglobulin loci, thereby controlling the magnitude of antibody secretion across multiple isotypes. We next examined whether O-GlcNAcylation influences transcriptional programs governing plasmablast differentiation. Among key regulators of B-cell fate transitions, BLIMP1 (*Prdm1*) transcription showed the most pronounced suppression under OGT-inhibited conditions, despite being robustly induced by cytokine stimulation in control cells, accompanied by a parallel reduction in IRF4, whereas BCL6 and AID exhibited only modest, non-significant decreases (Fig. 2L, M and Fig. S1). This selective pattern indicates that O-GlcNAcylation is not broadly required for early activation or germinal center entry programs, but is instead critical for sustaining the transcriptional switch toward the plasmablast and antibody-secreting cell fate. In particular, the marked loss of BLIMP1 provides a plausible molecular basis for the impaired generation of high-output antibody-secreting cells under O-GlcNAc–limited conditions. Taken together, these data demonstrate that O-GlcNAcylation emerges as a central, B cell–intrinsic regulator that integrates proliferative capacity, class-switch recombination, immunoglobulin expression and differentiation-associated transcriptional programs to enable efficient antibody production following B-cell activation.

**O-GlcNAc-dependent regulation of antibody production is recapitulated in the CH12F3-2A B-cell model**

To further validate the cell-intrinsic role of O-GlcNAcylation in a homogeneous and genetically tractable system, we employed the CH12F3-2A B-cell line, which undergoes robust IgA class-switch recombination and plasmablast-like differentiation upon combined stimulation with LPS, IL-4, and TGF-β (27) (Fig. 3A, B). This well-established model enables quantitative dissection of intrinsic mechanisms governing immunoglobulin production downstream of activation. In line with the results obtained in primary splenic B cells from mouse, pharmacologic inhibition of O-GlcNAcylation in stimulated CH12F3-2A cells led to a marked reduction in the expression of both IgA and residual unswitched IgM (Fig. 3C–E), whereas OGA inhibition exerted minimal effects. These findings indicate that the O-GlcNAc dependency of antibody production is preserved across distinct B-cell systems. We next examined whether the reduced antibody output observed in CH12F3-2A cells was also associated with altered cell accumulation, proliferation, or survival following cytokine stimulation. Upon stimulation with LPS, IL-4, and TGF-β, O-GlcNAc inhibition resulted in a greater than twofold reduction in total cell numbers compared with control conditions (Fig. 3F, left). Assessment of cell viability by propidium iodide (PI) staining revealed a concomitant increase in dead cells under O-GlcNAc–inhibited conditions (Fig. 3F, right), indicating that reduced cell accumulation reflects contributions from both impaired expansion and increased cell death. At the molecular level, induction of the proliferation-associated regulator c-Myc was markedly attenuated upon O-GlcNAc inhibition (Fig. 3G), whereas expression of *Ccnd2* (Cyclin D2) was only modestly reduced (Fig. 3H, left). In contrast, expression of *Lef1*, a downstream effector of Wnt/β-catenin signaling with established roles in B-cell survival and activation (28, 29), was robustly induced upon stimulation but was strongly suppressed under O-GlcNAc–inhibited conditions, returning to near-baseline levels (Fig. 3H, right). These findings indicate that O-GlcNAcylation supports B-cell accumulation during activation by sustaining both proliferative and survival-associated transcriptional programs in this cellular context. To further delineate the impact of O-GlcNAcylation on IgA class-switch recombination at the transcriptional level, we quantified both germline and post-switch transcripts at the IgA locus (Fig. 3I). Under O-GlcNAc-inhibited conditions, IgA germline transcription was modestly decreased, whereas expression of switched IgA transcripts was markedly reduced (Fig. 3J). Similar to primary B cells, unswitched IgM transcripts were also decreased (Fig. 3K), further supporting the notion that O-GlcNAcylation broadly supports productive immunoglobulin gene expression rather than selectively regulating isotype choice. Together, these data establish O-GlcNAcylation as a common intrinsic determinant of B cell activation and effector antibody production, acting consistently across diverse B cell systems.

**O-GlcNAcylation stabilizes OCT-1 and OCA-B in B cells**

Proteomic profiling using WGA (wheat-germ agglutinin) lectin pull-down, which selectively enriches O-GlcNAcylated proteins (30) (Fig. 4A), revealed both OCT-1 and OCA-B within the O-GlcNAc-enriched fraction of B-cell lysates (Fig. 4B). In addition, consistent with their well-established functional partnership in immunoglobulin gene regulation (31), co-immunoprecipitation analysis confirmed that OCT-1 and OCA-B are physically associated in B cells (Fig. 4C). OCT-1 has previously been shown to be modified by O-GlcNAc, with its transcriptional activity influenced by this modification (32), and our chromatin immunoprecipitation (ChIP) assays also revealed that OCT-1 occupancy at the immunoglobulin heavy-chain gene promoter was markedly reduced under conditions of O-GlcNAc inhibition in B cells, whereas OGT-competent control cells maintained strong promoter binding (Fig. S2). However, O-GlcNAc modification of OCA-B has not been reported, prompting us to investigate whether O-GlcNAcylation contributes to the activity of this lineage-defining co-activator that sits at the core of B-cell identity and antibody gene regulation (24, 33). Upon treatment with an OGT inhibitor in CH12F3-2A B cells, mRNA expression of *POU2F1* (OCT-1) and *POU2AF1* (OCA-B) remained largely unchanged (Fig. 4D), whereas immunoblot analyses revealed a marked reduction in OCT-1 and OCA-B protein levels (Fig. 4E, F). In addition, siRNA-mediated OGT knockdown in CH12F3-2A B cells similarly resulted in a pronounced decrease in OCT-1 and OCA-B protein abundance, consistent with the reduction in O-GlcNAcylation observed with chemical OGT inhibition (Fig. 4G, H). Importantly, co-treatment with the proteasome inhibitor MG132 prevented this reduction even in the presence of O-GlcNAc inhibitor (Fig. S3), indicating that loss of O-GlcNAcylation promotes proteasome-dependent degradation of both factors. To validate these findings in a primary setting, splenic B cells isolated from mice and cultured under *ex vivo* cytokine stimulation showed a similar decrease in OCT-1 and OCA-B protein abundance upon pharmacologic O-GlcNAc inhibition (Fig. 4I, J and Fig. S4). Collectively, these findings indicate that O-GlcNAcylation preserves the stability of OCT-1 and OCA-B, two central regulators of immunoglobulin production and B cell activation, thereby linking O-GlcNAc dynamics to the coordinated expression of factors required for efficient antibody secretion in B cells.

**O-GlcNAc–dependent OCA-B expression sustains plasmablast-like differentiation and antibody production**

Given that OCA-B (OBF-1/Bob-1) is not only critical for immunoglobulin gene transcription but also plays essential roles in B-cell differentiation, germinal center (GC) formation, and high-affinity antibody responses (24-26, 34), the link between its protein stability and O-GlcNAcylation represents a striking finding. To explore this connection more deeply, we generated OCA-B expression constructs comprising wild-type (WT) and a serine-to-alanine mutant (S130A) at a site predicted to be O-GlcNAc-modified according to publicly available glycoproteomic databases (*O-GlcNAcAtlas* and *GlyCosmos*) (35, 36) (Fig. 5A). When expressed in either the B-cell line CH12F3-2A or the heterologous HEK293T system, the S130A mutant exhibited more than a ten-fold reduction in protein abundance relative to WT OCA-B (Fig. 5B and Fig. S5A), despite comparable mRNA expression levels in both cell types (Fig. 5C and Fig. S5B). This consistent reduction across both B-cell and non–B-cell environments suggests that the instability caused by the S130A mutation arises from intrinsic properties of OCA-B, rather than from the absence of B-cell–specific stabilizing factors.

To investigate the functional consequences of O-GlcNAc–dependent OCA-B regulation in a defined B-cell activation model, we employed the CH12F3-2A cell line, which has been widely used to study cytokine-driven B-cell activation and class-switch recombination (CSR) (27). Although CH12F3-2A cells are frequently utilized as a model of IgA CSR, cytokine stimulation with LPS, IL-4, and TGF-β also induced transcriptional features characteristic of plasmablast-like differentiation (Fig. 3A, B). Specifically, stimulation resulted in robust upregulation of the plasma-cell–associated transcription factors Blimp1 and IRF4, as well as increased expression of CD138, whereas expression of the germinal center–associated factor BCL6 remained largely unchanged (Fig. 5D). This pattern indicates that, under these conditions, CH12F3-2A cells preferentially engage a differentiation program aligned with antibody-secreting cell fate rather than a canonical germinal center state. Concomitant with this differentiation program, cytokine stimulation markedly increased antibody production, including both IgM and IgA (Fig. 5E). Notably, pharmacologic inhibition of O-GlcNAcylation with OSMI-1 led to a pronounced reduction in OCA-B protein abundance (Fig. 5E) and resulted in a strong suppression of stimulation-induced Blimp1, IRF4, and CD138 expression, reducing their levels to those observed under unstimulated conditions (Fig. 5D). In parallel, production of both IgM and IgA was substantially diminished (Fig. 5E), consistent with impaired plasmablast-like differentiation. These findings indicate that maintenance of O-GlcNAc homeostasis is required to sustain OCA-B expression and to support the transcriptional programs underlying antibody-secreting cell differentiation in this model. To more directly assess the contribution of OCA-B to these O-GlcNAc–dependent effects, we next suppressed OCA-B expression using siRNA-mediated knockdown under cytokine-stimulated conditions (Fig. 5F, G). While OCA-B knockdown did not alter global O-GlcNAc levels, it effectively reduced OCA-B protein expression and recapitulated several key features of O-GlcNAc inhibition. In particular, expression of Blimp1 was markedly reduced (Fig. 5H), accompanied by a significant decrease in both IgM and IgA production (Fig. 5G, I). At the transcript level, both IgM and IgA were diminished, with IgA showing a more pronounced reduction (Fig. 5J-L). In contrast to OSMI-1 treatment, OCA-B knockdown did not significantly affect c-Myc expression (Fig. 5F, G) or overall cell expansion (Fig. 5M), indicating that OCA-B selectively governs differentiation-associated transcriptional outputs rather than proliferative capacity in this context. Collectively, these results indicate that O-GlcNAcylation contributes to plasmablast-like differentiation in CH12F3-2A cells, at least in part through maintenance of OCA-B protein levels and associated transcriptional programs.

**O-GlcNAcylation and OCA-B shape overlapping transcriptional program during B-cell activation and differentiation**

To define the cell-intrinsic transcriptional programs regulated by O-GlcNAcylation during B-cell activation, we performed genome-wide expression profiling of primary splenic B cells stimulated with CD40 ligand, IL-4, and IL-21 in the presence of either the OGT inhibitor OSMI-1 or siRNA-mediated depletion of OCA-B (Fig. 6A). This stimulation condition recapitulates key features of T cell–dependent B-cell activation and differentiation toward antibody-producing states. To sensitively capture changes in productive mRNA output associated with activation and differentiation, we employed QuantSeq 3′ mRNA sequencing (Fig. 6A), enabling robust gene-level quantification of polyadenylated transcripts across defined perturbations within a uniform activation context. Global inspection of transcriptional changes by volcano plot analysis revealed that OGT inhibition induced substantially broader gene expression remodeling than OCA-B depletion, with a strong bias toward downregulation. (Fig. 6B). In contrast, OCA-B knockdown affected a more restricted gene set, yet the overall directionality of change closely mirrored that observed under O-GlcNAc inhibition (Fig. 6C). These findings suggest that O-GlcNAcylation exerts broad transcriptional control during B-cell activation, while OCA-B contributes to a substantial subset of these effects. Gene ontology analysis of differentially expressed genes highlighted cell differentiation–related pathways as the most prominently altered category under both conditions (Fig. 6D, E). Notably, genes associated with cell differentiation were predominantly downregulated rather than upregulated (Fig. 6D, E and Fig. S6A), consistent with impaired progression toward activated and effector B-cell states. Additional enriched categories included immune response, apoptosis or cell death regulation (Fig. 6D, E and Fig. S6B, C). Across all major functional classes, downregulated genes outnumbered upregulated genes, with OGT inhibition producing the strongest magnitude of suppression and OCA-B depletion yielding a qualitatively similar, though quantitatively reduced, pattern.

To further resolve B-cell–specific transcriptional effects, we curated and reanalyzed gene sets associated with defined B-cell programs. Genes involved in B-cell activation were broadly and consistently downregulated under both OGT inhibition and OCA-B depletion (Fig. 6F-H), displaying highly concordant expression patterns. Likewise, transcriptional regulators and effector genes linked to B-cell differentiation were strongly suppressed in both conditions (Fig. 6F-H). Notably, RNA-seq analysis revealed that the mRNA level of the OCA-B–encoding gene *Pou2af1* remained largely unchanged following OGT inhibition by OSMI-1, whereas it was markedly reduced upon OCA-B knockdown (Fig. 6H). This observation supports our biochemical data indicating that O-GlcNAcylation regulates OCA-B primarily at the protein stability level rather than at transcription (Figs. 4 and 5), reinforcing a post-translational control mechanism. Despite preserved *Pou2af1* transcript abundance, numerous genes associated with key B-cell programs were similarly downregulated in both conditions. These included cell-cycle–associated proliferative genes such as *Lef1* and *Smc4* (37), lineage-defining transcription factors including *Irf8* and *Ikzf1* (38, 39), and signaling or metabolic-associated regulators exemplified by *Enpp1* (40). In contrast, a subset of genes, including the hematopoietic regulators *Myb* (37, 41) and *Lyl1* (42, 43) and the epigenetic modulator *Hdac5*, were selectively reduced only under OGT inhibition but not upon OCA-B depletion, indicating the presence of OCA-B–independent transcriptional effects of O-GlcNAcylation. Particularly noteworthy, O-GlcNAc inhibition disrupted multiple components of the Oct transcriptional machinery required for OCA-B function. In addition to the marked reduction of OCA-B protein stability, OCT-1 protein abundance was similarly decreased under OSMI-1 treatment (Figs. 4 and 5), consistent with a shared dependence on O-GlcNAcylation for protein stability. At the transcriptional level, expression of *Pou2f2* (Oct-2), the principal B-cell–specific DNA-binding partner of OCA-B (44, 45), was selectively diminished in OSMI-1–treated cells but remained largely unchanged following OCA-B knockdown. These findings indicate that O-GlcNAc inhibition impairs OCA-B–dependent activation programs not only by destabilizing OCA-B itself but also by weakening the broader Oct-1/Oct-2–OCA-B transcriptional axis through combined post-translational and transcriptional mechanisms. Together, these results indicate that O-GlcNAc inhibition disrupts B-cell transcriptional programs partly through destabilization of OCA-B and associated Oct factors, while additional gene-expression changes not reproduced by OCA-B depletion suggest parallel OCA-B–independent effects. Thus, OCA-B represents a major, but not exclusive, mediator of O-GlcNAc–dependent regulation of B-cell activation.

***In vivo* inhibition of O-GlcNAcylation impairs B cell activation and antibody responses**

To evaluate the physiological relevance of O-GlcNAcylation in humoral immune responses *in vivo*, we employed a pharmacologic inhibition model in which mice were immunized with NP-CGG in alum and concurrently treated with the OGT inhibitor OSMI-1 via daily intraperitoneal injection throughout the immunization period (Fig. 7A). This approach allowed us to assess the impact of sustained O-GlcNAc suppression on antigen-driven B-cell activation and antibody production in an intact immune system. Analysis of splenic B cells isolated from OSMI-1–treated mice revealed a marked reduction in global O-GlcNAcylation levels, accompanied by a pronounced decrease in the protein abundance of OCT-1 and OCA-B compared with vehicle-treated controls (Fig. 7B, C), consistent with our *in vitro* and *ex vivo* findings that O-GlcNAcylation is required to maintain the stability of these key regulatory factors. In addition, antibody production was significantly diminished in OSMI-1–treated mice (Fig. 7B, C), indicating that systemic inhibition of O-GlcNAcylation compromises humoral output *in vivo*. To further examine the cellular basis of this defect, we quantified NP-specific antibody-secreting cells (ASCs) within total splenocyte preparations. OSMI-1 treatment of immunized mice resulted in a marked reduction in the frequency of NP-specific ASCs (Fig. 7D), suggesting impaired establishment and/or maintenance of antigen-specific antibody-secreting populations during the immune response *in vivo*. Notably, splenocytes were subsequently plated and cultured under identical, OSMI-1–free conditions for ELISpot assays, such that this assay reflects defects imprinted *in vivo*. While this analysis captures systemic alterations in B-cell activation and differentiation, we next asked whether O-GlcNAcylation also directly regulates the intrinsic capacity of antigen-experienced B cells to produce antibodies. To address this, splenocytes from NP-CGG–immunized mice were plated at equal cell numbers and cultured *ex vivo* in the presence or absence of OSMI-1, followed by ELISpot analysis of NP(30)- and NP(8)-specific IgG responses. Under these controlled conditions, OSMI-1 treatment led to a modest reduction in spot numbers, but a more pronounced decrease in spot intensity was observed for both NP(30)- and NP(8)-specific IgG (Fig. 7E, F). These results indicate that O-GlcNAcylation contributes not only to the generation of antigen-specific ASCs in vivo but also to the per-cell antibody secretion capacity of differentiated B cells. Importantly, flow cytometric analysis of splenic immune compartments revealed that total splenocyte numbers (Fig. 7G) and the overall abundance of CD45+ leukocytes were not significantly altered following systemic OSMI-1 administration (Fig. 7H and Fig. S7A), and that the frequencies of total B cells (CD45+B220+) (Fig. 7I) and T cells (CD45+CD3ε+) were largely preserved (Fig. S7B), indicating that O-GlcNAc inhibition does not result in broad depletion of lymphoid populations. In contrast, a modest reduction was observed in the CD45⁺CD11b⁺ myeloid-enriched population (Fig. S7C), suggesting differential sensitivity of select immune subsets to systemic O-GlcNAc perturbation. Notably, despite the relative preservation of total B cell numbers (Fig. 7I), OSMI-1 treatment caused a selective reduction in germinal center (GC) B cells, as defined by the canonical GL7⁺CD95(Fas)⁺ phenotype (Fig. 7J and Fig. S7D). This decrease was accompanied by a corresponding increase in B220⁺GL7⁻CD95⁻ cells, indicating a redistribution of B-cell subsets rather than global B-cell loss and suggesting impaired differentiation into, or maintenance of, the GC compartment. In parallel, the frequency of B220lowCD138⁺ antibody-secreting plasma cells was also significantly decreased (Fig. 7K and Fig. S7E). These findings indicate that O-GlcNAcylation is preferentially required for activation-associated B-cell subsets and differentiation toward antibody-secreting states, rather than for maintenance of overall immune cell homeostasis. Collectively, these *in vivo* data demonstrate that O-GlcNAcylation is tightly linked to antigen-driven B-cell activation and antibody responses, coinciding with reduced OCT-1 and OCA-B protein abundance and impaired formation of germinal center and plasma cell compartments. Together with our cell-intrinsic analyses, these findings support a model in which O-GlcNAcylation functions as a metabolic regulatory layer that sustains transcriptional programs required for effective humoral immunity *in vivo*.

**DISCUSSION**

Nutritional deprivation is well recognized to impair vaccine efficacy and humoral immunity, yet the molecular pathways linking nutrient sensing to antibody production have remained obscure (46-48). Here we identify O-GlcNAcylation, a nutrient-responsive post-translational modification (13, 14), as a critical determinant of B-cell antibody output. Our data demonstrate that decreased O-GlcNAcylation under pharmacologic OGT inhibition attenuates antibody secretion both *in vivo* and *ex vivo*. A key insight from this study is that O-GlcNAcylation controls the stability of OCT-1 and OCA-B, two core components of the octamer-dependent regulatory module that drives immunoglobulin (Ig) gene expression and activation in B cells (24, 44, 49, 50). Both proteins were identified within the O-GlcNAc-enriched proteome of B cells, and their abundance was selectively diminished when O-GlcNAcylation was suppressed, without changes in transcript levels. This decrease was rescued by proteasome inhibition, indicating that O-GlcNAcylation is associated with reduced proteasome-dependent turnover of these transcription factors (51). Such stabilization mechanisms are consistent with the broader role of O-GlcNAc as a guardian of protein homeostasis, previously observed for p53, c-Myc, and EZH2, where the modification antagonizes proteasomal turnover and preserves transcriptional activity (22, 52-54).

The strong O-GlcNAc dependency of OCA-B protein stability also highlights an additional layer of metabolic control over B-cell activation. Our findings that OCA-B S130A mutants exhibit severe instability establish O-GlcNAc as a molecular switch that restrains proteasomal degradation. Given that OCA-B is indispensable for plasma-cell differentiation and germinal-center maintenance (24-26, 34), this regulation provides a direct route through which fluctuations in nutrient flux could translate into altered humoral output. Indeed, our previous work demonstrated that suppression of O-GlcNAcylation impairs early B-cell development and proliferation (22) and disrupts long-range chromatin interaction in V(D)J recombination (23). Together with the current findings, these results position O-GlcNAcylation as a central metabolic checkpoint spanning B-cell ontogeny, activation, and antibody synthesis. Beyond B cells, OCA-B has recently been shown to modulate T cell differentiation, particularly T follicular helper (Tfh) cell programming and effector cytokine production (55-57). These processes are also highly sensitive to cellular metabolic cues (58). The O-GlcNAc dependence of OCA-B stability uncovered here therefore suggests a potential mechanism by which nutrient sensing may coordinately influence both B- and T-cell arms of the adaptive immune response. In this context, fluctuations in O-GlcNAcylation could synchronize the timing and magnitude of germinal-center reactions by simultaneously influencing B-cell antibody production and Tfh-cell helper capacity.

An intriguing observation emerging from our study is that, although antibody secretion was broadly reduced upon suppression of O-GlcNAcylation, the decline was more pronounced for class-switched isotypes such as IgG1 and IgA than for IgM. This differential sensitivity suggests that O-GlcNAc signaling may intersect not only with the transcriptional machinery driving immunoglobulin heavy-chain gene expression but also with the molecular circuits governing class switch recombination (CSR). CSR is a complex process involving chromatin looping between switch (S) regions, regulated by architectural proteins such as cohesin, CTCF, and YY1, and requiring coordinated activation of AID, Spt5, and the 53BP1 complex (59-61). Perturbations in chromatin topology or transcriptional pausing can markedly reduce recombination efficiency, leading to lower production of downstream IgG and IgA isotypes. Recent studies have shown that several CSR-associated factors, including the cohesin complex (SMC1/SMC3) and YY1, are themselves modified by O-GlcNAcylation (23, 62), which influences their chromatin-binding stability and higher-order genome organization. O-GlcNAc addition to these factors has been proposed to regulate enhancer–promoter interactions, DNA loop extrusion, and histone modification recruitment mechanisms that are also crucial for establishing accessibility at immunoglobulin switch regions. Together, these observations raise the possibility that reduced O-GlcNAc flux may influence the structural and transcriptional environment of the IgH locus

Nutritional restriction, aging, and metabolic disorders such as diabetes are all characterized by lowered O-GlcNAc flux and diminished vaccine responsiveness (46, 63-65). These systemic conditions share a common metabolic signature of reduced glucose and amino-acid availability, which limits substrate flow through the hexosamine biosynthetic pathway and consequently decreases global O-GlcNAcylation. Such metabolic insufficiency has been associated with impaired germinal-center formation, weakened seroconversion, and poor memory B-cell persistence in animal models (21). Consistent with the idea that immune tissues may lose metabolic flexibility with age, we and others have noted trends consistent with reduced O-GlcNAcylation in lymphoid tissues under aging-associated metabolic stress. This observation motivates future work testing whether restoring O-GlcNAc homeostasis can preferentially rescue humoral immunity under age- or nutrient-limited conditions (66-68). An important nuance is that raising O-GlcNAcylation above an already elevated activation baseline may yield modest effects in nutrient-replete, strongly stimulated settings. Indeed, in multiple lymphocyte activation paradigms, global O-GlcNAcylation increases rapidly upon stimulation, and OGA inhibition can show limited incremental benefit depending on the baseline state. This consideration aligns with our observation that Thiamet-G robustly elevates global O-GlcNAcylation yet does not substantially increase antibody output under our standard *ex vivo* stimulation conditions. We therefore propose that strategies aimed at elevating O-GlcNAcylation may be most impactful in contexts where O-GlcNAc flux is pathologically constrained, such as nutritional deprivation, aging-associated metabolic inflexibility, or other stress states that lower baseline O-GlcNAc availability (19, 69, 70).

By stabilizing the OCT-1/OCA-B octamer module, O-GlcNAcylation provides a molecular scaffold that enables activated B cells to convert recombined immunoglobulin loci into high-output antibody production and to engage the BLIMP1-dependent plasmablast differentiation program. Our data indicate that O-GlcNAcylation is not strictly required for the initial induction of germline transcription but is essential for sustaining productive post-switch immunoglobulin transcription, but be essential for sustaining post-switch Ig transcription, plasma-cell commitment, and the per-cell magnitude of antibody secretion. This places O-GlcNAcylation not at the level of lineage choice, but at the critical amplification step that transforms activated B cells into efficient effector cells. Together, these findings establish O-GlcNAcylation as a previously unrecognized metabolic control layer that couples cellular nutrient status to the transcriptional and post-transcriptional machinery governing humoral immunity. Disruption of this axis collapses OCT-1/OCA-B stability, blunts BLIMP1 induction, and ultimately limits immunoglobulin output across isotypes. Conversely, maintaining appropriate O-GlcNAc dynamics emerges as a key determinant of productive antibody responses, with potential implications for vaccine responsiveness and immune competence in settings where metabolic signaling or glycosylation homeostasis is perturbed.

**MATERIALS AND METHODS**

**Animal experimental models**

C57BL/6 male mice (6 weeks of age) were purchased from Koatech (Pyeongtaek, Republic of Korea) and housed in a specific pathogen-free animal facility at the Korea Research Institute of Bioscience and Biotechnology (KRIBB, Daejeon, Republic of Korea). Animals were maintained under controlled environmental conditions, including a 12-hour light/12-hour dark cycle at a constant temperature of 23°C, with unrestricted access to standard chow and water. All animal procedures were conducted in accordance with institutional guidelines and were approved by the KRIBB Animal Experiments Ethics Committee (approval number: KRIBB-AEC-23102). For Immunization, mice were immunized by intraperitoneal injections of 100 μg of NP28-CGG (Biosearch Technologies, N-5055C-5) dissolved in 100 μL of PBS together with 100 μL of Alhydrogel® adjuvant 2% (InvivoGen, vac-alu-50). For pharmacologic inhibition of O-GlcNAcylation in vivo, mice received daily intraperitoneal injections of OSMI-1 (MedChemExpress, HY-119738) at a dose of 1 mg per mouse for 7 consecutive days. OSMI-1 was freshly prepared in a vehicle solution consisting of 5% DMSO and 7% Tween-80 (MilliporeSigma, P8074) diluted in distilled water, and a total volume of 150 μL was administered per injection.

**Isolation of primary B cells**

Primary naive B cells were isolated from the spleens of 6–8-week-old male C57BL/6 mice (Koatech, Republic of Korea). Spleens were mechanically dissociated by gentle disruption through a 40-µm cell strainer (Corning, 352235) to generate single-cell suspensions. Red blood cells were removed by incubation with 1× red blood cell lysis buffer (BioLegend, 420301) at room temperature for 5–10 min, followed by washing and centrifugation. Cell pellets were resuspended in sorting buffer consisting of HBSS supplemented with 0.5% bovine serum albumin (BSA) and 2 mM EDTA. To prevent nonspecific antibody binding, Fc receptors were blocked by incubation with anti-mouse CD16/32 Antibody (BioLegend, 101302) at 4°C for 20 min. For negative selection of naïve B cells, splenocytes were stained with biotin-conjugated antibodies against lineage markers, including CD11b (BioLegend, 101204) and CD43 (Miltenyi Biotec, 130-101-954), at 4°C for 20 min. After washing, cells were incubated with streptavidin-conjugated magnetic microbeads (Miltenyi Biotec, 130-048-101) and subjected to magnetic separation using MACS LD columns (Miltenyi Biotec, 130-042-901), according to the manufacturer’s instructions. The unlabeled fraction, depleted of CD11b⁺ myeloid cells and CD43⁺ activated or immature lymphocytes, was collected and used as the naïve B-cell population. Purity of isolated cells was routinely assessed by flow cytometry and confirmed by high expression of B220 and absence of activation markers, including CD43 and CD11b. These negatively selected splenic B cells were subsequently used for ex vivo stimulation and downstream functional and transcriptional analyses.

**Cell culture**

Primary naive B cells were isolated from mouse spleens by negative selection based on the absence of CD43 and CD11b expression and cultured in RPMI 1640 medium (Corning, 10-040-CVRC) supplemented with 10% heat-inactivated fetal bovine serum (FBS; ThermoFisher, 16000-044), 50 μM 2-mercaptoethanol (ThermoFisher, 31350010), 1x Non-essential amino acids (ThermoFisher, 11140050), 1 mM sodium pyruvate (ThermoFisher, 11360070), 2 mM GlutaMAX™ Supplement (ThermoFisher, 35050061), and 1× Antibiotic–Antimycotic solution (ThermoFisher, 15240062). The murine B lymphoma cell line CH12F3-2A (Cell Bank Riken BioResource Research Center, Tsukuba, Japan) (71) was maintained under similar culture conditions using RPMI 1640 medium supplemented with the same components, except for the further addition of 20 mM HEPES (ThermoFisher, 15630-808). HEK-293T cells (ATCC) were cultured in Dulbecco’s Modified Eagle Medium (DMEM; Corning, 10-013-CVRC) supplemented with 10% heat-inactivated FBS and 1× Antibiotic–Antimycotic solution, and maintained under standard conditions. All cell types were cultured at 37°C in a humidified incubator with 5% CO₂. Where indicated, pharmacologic modulation of O-GlcNAc cycling was achieved by treating cells with the OGT inhibitor OSMI-1, dissolved in DMSO, or the OGA inhibitor Thiamet G, dissolved in DMSO. Final working concentrations were 20 μM for OSMI-1 and 2 μM for Thiamet G, and equivalent volumes of vehicle were used as controls.

**Immunoblot**

Cells were collected and lysed in SDS-based lysis buffer composed of 0.5% SDS, 50 mM Tris-HCl (pH 6.8), 1 mM EDTA, 1 mM DTT, and a protease inhibitor cocktail (GenDepot, P3100-005). Lysates were incubated on ice for 5 min and subsequently diluted with an ice-cold detergent-containing buffer (1.25% NP-40, 0.625% sodium deoxycholate, 62.5 mM Tris-HCl [pH 8.0], 2.25 mM EDTA, 187.5 mM NaCl, and protease inhibitors) at a 1:4 ratio, followed by further incubation on ice for 15 min. To ensure efficient disruption of genomic DNA and homogenization of lysates, samples were subjected either to mechanical shearing using a QIAshredder column (Qiagen, 79654) by passing the lysate through the column twice, or to sonication using a probe sonicator (100–150 μL volume, 20% amplitude, 1 s on/1 s off pulses for 10 cycles) on ice. Cellular debris was removed by centrifugation at 13,000 rpm for 10 min at 4°C, and the clarified supernatants were collected for downstream analysis. Protein concentrations were determined using the Pierce™ BCA Protein Assay Kit (ThermoFisher, 23225). Equal amounts of protein (5–20 μg per sample) were mixed with 5× SDS-PAGE sample buffer (TransLab, TLP-102.1), resolved on 4–12% Tris–glycine SDS-PAGE gels, and transferred onto nitrocellulose membranes (Amersham, 10600002) using a semi-dry Power Blotter system (Thermo Fisher, PB0012).

Membranes were blocked in Tris-buffered saline (TBS) supplemented with 5% bovine serum albumin (BSA) for 30 min at room temperature and incubated overnight at 4°C with primary antibodies diluted in TBS containing 0.05% Tween-20 and 5% BSA (TBS-T). Following five washes with TBS-T, membranes were incubated with horseradish peroxidase– or infrared dye–conjugated secondary antibodies for 1-2 h at room temperature. After additional washes, protein signals were detected using the Odyssey Fc Imaging System and quantified with Image Studio software (LI-COR Biosciences).

The following antibodies were used in this study: O-GlcNAc (RL2; ThermoFisher, MA1-072 or CTD110.6; SantaCruz Biotechnology, SC-59623), FLAG (Sigma, F1804), c-Myc (CST, 9402S), IgM-conjugated HRP (Abcam, ab97230), IgG1-conjugated HRP (Southern Biotech, 1071-05), IgA-conjugated HRP (Southern Biotech, 1040-05), OCT1 (SantaCruz Biotechnology, sc-8024), OCA-B (SantaCruz Biotechnology, sc-23932), ubiquitin (CST, 3936T), β-actin (SantaCruz Biotechnology, SC-47778), GAPDH(CST, 5174S).

**WGA-lectin based pull-down assay and immunoprecipitation**

O-GlcNAc–modified proteins were enriched using a wheat germ agglutinin (WGA) lectin–based affinity approach with the Glycoprotein Isolation Kit, WGA (Thermo Fisher Scientific, 89805), according to the manufacturer’s instructions with minor modifications. Whole cell lysates from CH12F3-2A were prepared as described in the Immunblot section. For WGA pull-down, 300 μg of clarified protein lysate was combined with 5× Binding/Wash buffer to a final 1× concentration. WGA lectin resin (200 μL of 50% slurry) was equilibrated by washing three times with 1× Binding/Wash buffer and subsequently incubated with lysates for 30 min at room temperature under end-over-end rotation. Control agarose resin (Pierce™ Control Agarose Resin, Thermo Fisher Scientific, 26150) was processed in parallel to assess nonspecific binding. After incubation, resins were washed four times with 1× Binding/Wash buffer, and bound proteins were eluted by boiling the beads in 2× SDS-PAGE sample buffer prepared in RIPA buffer at 95°C for 10 min with shaking. Eluted fractions were then subjected to SDS-PAGE and immunoblot analysis.

For immunoprecipitation assays, 100–200 μg of total protein lysate was used per reaction. Appropriate antibodies (2–5 μg) were incubated with 40 μL of Pierce™ Protein A/G Magnetic Beads (ThermoFisher, 88802) for 20 min at room temperature with gentle rotation to allow antibody coupling. To reduce nonspecific interactions, lysates were pre-cleared by incubation with isotype-matched antibody–bead complexes at 4°C for 1 h. Pre-cleared lysates were then incubated with antibody-bound beads overnight at 4°C under continuous rotation. Following immunoprecipitation, beads were washed five times with PBS containing 0.1% Tween-20, and bound proteins were eluted by heating in SDS-PAGE sample buffer as described above.

**Quantitative RT-PCR**

Total RNA was isolated from cells cultured under the indicated conditions using TRIzol™ Reagent (ThermoFisher, 1596018), followed by removal of residual genomic DNA through treatment with RQ1 DNase (Promega) according to the manufacturer’s instructions. Purified RNA was subsequently reverse-transcribed, and cDNA amplification was performed using a RealHelixTM qRT–PCR kit [Green] (NanoHelix, QRT2-S500). Quantitative PCR analysis was carried out on a CFX96™ Real-Time PCR Detection System (Bio-Rad) using green fluorescent dye–based detection chemistry. The amplification protocol consisted of an initial reverse transcription step at 50°C for 30 min, followed by enzyme activation at 95°C for 15 min. This was followed by 45 cycles of denaturation at 95°C for 20 s, annealing at 60°C for 30 s and extension at 72°C for 30s. Relative gene expression levels were calculated using the comparative Ct method and normalized to β-actin or GAPDH as an internal reference. Primer sequences used for quantitative PCR are provided in Table S1.

**Chromatin Immunoprecipitation (ChIP)-qPCR assays**

Chromatin immunoprecipitation experiments were performed using CH12F3-2A cells treated with or without OSMI-1. Briefly, 5 × 106 cells per condition were processed for ChIP using a commercial ChIP assay kit (Sigma, 17-295) according to the manufacturer’s instructions. Cells were cross-linked, lysed, and chromatin was fragmented as specified in the kit protocol. Immunoprecipitation was carried out using an antibody against OCT-1 (SantaCruz, sc-8024), and normal mouse IgG (Santa Cruz, sc-2025) was used during the pre-clearing step to minimize nonspecific binding. Following immunoprecipitation and reversal of cross-links, recovered DNA was purified and subjected to quantitative real-time PCR analysis.

qPCR was performed under the following cycling conditions: an initial denaturation step at 95°C for 10 min, followed by 45–55 cycles of denaturation at 95°C for 20 s and annealing/extension at 58–60°C for 60 s, with a final extension at 72°C for 10 min. Enrichment of the IGHV1-74 promoter region was calculated relative to input DNA and normalized to a β-actin genomic region used as an internal control. Primer sequences used for ChIP-qPCR analysis are provided in Table S1.

**Plasmid construction**

A cDNA encoding murine OCA-B (Pou2af1) was obtained in the pCMV6-Entry expression vector from OriGene (Rockville, MD, USA; MR203298). An O-GlcNAc–deficient mutant of OCA-B (S130A) was generated by site-directed mutagenesis using a commercial mutagenesis service (Bioneer, Republic of Korea). All constructs were verified by DNA sequencing prior to use.

**Plasmid transfection**

Transient overexpression of wild-type or mutant OCA-B constructs was achieved using the Neon™ Transfection System (ThermoFisher, MPK5000) or TransIT-X2 reagents (Mirus, MIR6000) according to the manufacturers’ instructions with minor adjustments.

For CH12F3-2A cells (2 × 106 cells per reaction) were washed once with PBS and pelleted by centrifugation. Cells were resuspended in a mixture containing 110 μL of Neon Resuspension Buffer R and 2.5 μL of plasmid DNA (2.5 pmol). A 100 μL aliquot of the cell–DNA suspension was aspirated into a Neon pipette tip and electroporated twice at 1,350 V with a pulse width of 20 ms in Neon Electrolytic Buffer E. Immediately after electroporation, cells were transferred into pre-warmed complete culture medium in 6-well plates and allowed to recover under standard culture conditions.

For HEK-293T cells, 3 × 105 cells were seeded into 12‐well plates in DMEM supplemented with 10% FBS at 37°C in a humidified incubator containing 5% CO2 for 24 h prior to transfection. For transfection, 1 μg of plasmid and 3 μl of TransIT-X2 were added to 100 μl of Opti-MEM Reduced Serum Medium (Thermo, 31985062) and incubated at room temperature for 30 min. The TransIT‐X2-plasmid complexes were added dropwise to each well and incubated for 24 h.

**siRNA-mediated gene silencing**

For CH12F3-2A cells, 2 × 106 cells were collected and resuspended in 100 μL of Neon Resuspension Buffer R containing 10 μL of siRNA solution (100 nM final concentration). The cell–siRNA mixture was loaded into a 100 μL Neon pipette tip and electroporated twice at 1,400 V with a pulse width of 20 ms, using the Neon™ Transfection System. Electroporated cells were immediately transferred into 100-mm culture dishes containing standard culture media. For primary naive B cells, transfection was performed using the same protocol but with Neon Resuspension Buffer T.

The following siRNAs were used in this study:

AccuTargetTM Negative Control siRNA (Bioneer, SN-1003), mouse OCA-B siRNA (#1: 5’-GAUAUGGUAUGGAGGAUAA-3’, #2: 5’-GAGAAGAAAGCGUGGCCAU-3’), and mouse OGT siRNA (5’-CCUGAUAGAUCUGGCAAUA-3’).

**Enzyme-linked immunosorbent assay (ELISA)**

The levels of secreted antibodies in cell culture supernatants were determined by ELISA. Briefly, 96-well half-area plates (Corning, 3690) were coated with 0.5 μg/mL of purified antibodies (BioLegend; mouse anti-IgM, 406502; anti-IgG1, 406602; anti-IgE, 406902; anti-IgA, 407002) in PBS (50 μL/well) overnight at 4°C. The plates were washed three times with PBS-T (0.05% Tween-20) followed by blocking with 0.5 % BSA in PBS for 1h at room temperature. After blocking, 1/10 diluted samples were added to the wells and incubated for 2 h at room temperature After five washes with PBS-T, appropriate HRP-conjugated secondary antibodies were added for detection. The reaction was developed with TMB substrate reagent set (BD, 555214) and stopped with 2N H2SO4. The optical density (OD) was measured at 450 nm using a microplate reader.

**Enzyme-linked ImmunoSpot (ELISpot)**

For ELISpot, Multi Screen-IP Filter 96-well plates (Millipore, MAIPSWU10) were treated with 70% ethanol at RT for 1 min followed by three washes with distilled water and coated with 30 μg/mL NP30 or NP8–BSA (100 μL/well, Biosearch, N-5050H, N-5050L) in PBS overnight at 4 °C. After washing sequentially four times with PBS and two times with culture media described above, the plates were incubated with 200 μl per well of the culture media at RT for 2 h. Mouse splenocytes isolated from the immunized mice were serially diluted and added to the plates and then incubated at 37 °C for 48 h in a humidified incubator with 5% CO₂. After incubation, the plates were washed twice with PBS and thrice with PBS-T (0.05 % Tween-20), incorporating a 1-min soaking period between washes. 100 μL of HRP-conjugated anti-mouse IgG (CST, 7076) diluted 1:1,000 using 10 % FBS in PBS was added to the plates and incubated at RT for 1 h. The plates were washed five times with PBS-T (0.05 % Tween-20) and two times with PBS. After washing, 3-amino-9-ethyl-carbazole (AEC) substrate solution (BD, 551015) was added to the plates for the development of spots. The development of spots was monitored until distinct spots would emerge, then stopped by washing extensively with water. After drying the plates in air completely, the spots were inspected and counted automatically using ImmunoSpot Analyzer (Cellular Technology Limited).

**Flow cytometry analysis**

For flow cytometric analysis, cells were harvested, washed, and resuspended in staining buffer consisting of 1× HBSS supplemented with 0.5% BSA and 2 mM EDTA. Cells were incubated with fluorochrome-conjugated antibodies for 20–30 min at 4°C in the dark. Where indicated, Fc receptors were blocked prior to antibody staining using anti-CD16/32 to minimize nonspecific binding. Following staining, cells were washed twice with staining buffer and resuspended in the same buffer for acquisition. For experiments requiring viability assessment, appropriate live/dead discrimination dyes were included according to the manufacturer’s instructions. Data were acquired on a BD FACS Verse flow cytometer (BD Biosciences) and analyzed using Floreada.io (https://floreada.io) or FlowJo software (Tree Star). Gating strategies were established based on fluorescence-minus-one (FMO) and isotype controls, and representative gating schemes are provided in the corresponding figures or supplementary materials. The following antibodies were used in this study: PerCP-Cy5.5(406511) or PE-Cy7 anti-mouse IgM (406514), APC anti-mouse IgA (Southern Biotech, 1165-11), PE-Cy7 anti-mouse GL7 (144620), PE anti-mouse CD95 (Fas) (152608), FITC anti-mouse CD86 (105006), APC-Cy7 anti-mouse CD138 (142530), FITC anti-mouse CD45 (147709), PerCP-Cy5.5 anti-mouse CD11b (101227), APC-Cy7 anti-mouse CD3 (100329), and APC anti-mouse CD45R/B220 (103212). All antibodies were purchased from BioLegend unless otherwise specified.

**mRNA-sequencing analysis**

All RNA-sequencing experiments, except RNA isolation, were conducted by ebiogen Inc. Total RNA was isolated from naive B (CD43-CD11b-) cells isolated from mouse spleens cultured under the indicated conditions using TRIzol™ Reagent (ThermoFisher, 1596018), followed by removal of residual genomic DNA through treatment with RQ1 DNase (Promega) according to the manufacturer’s instructions. RNA quantification was performed using Micro volume spectrophotometer (FC-3100, Life Real). The construction of library was performed using QuantSeq 3' mRNA Seq V2 Library Prep Kit FWD (Lexogen) according to the manufacturer’s instructions. In brief, each total RNA were prepared and an oligo-dT primer containing an Illumina compatible sequence at its 5’ end was hybridized to the RNA and reverse transcription was performed. After degradation of the RNA template, second strand synthesis was initiated by a random primer containing an Illumina compatible linker sequence at its 5’ end. The double stranded library was purified by using magnetic beads to remove all reaction components. The library was amplified to add the complete adapter sequences required for cluster generation. The finished library is purified from PCR components. High-throughput sequencing was performed as single-end 100bp sequencing using NextSeq 2000 (Illumina Inc.). Raw sequencing reads were preprocessed using fastp v0.23.1 (72) to remove adapter sequences and low-quality reads. The filtered reads were then aligned to the reference genome using STAR v2.7.10b (73). The read counts were quantified using featureCounts v2.0.6 (74). For differential gene expression analysis, edgeR package v3.42.4 (75) was used, applying TMM normalized log2(CPM + 1) transformation to normalize the data. All of RNA sequencing analysis were performed by R programming (v.4.5.1) or ExDEGA (Ebiogen Inc., Korea). Functional annotation and classification of the differentially expressed genes (DEGs) were performed using Gene Ontology (GO) analysis, and the detailed gene lists are summarized in Table S2.

**Statistical analysis**

Data analysis was performed using Microsoft Excel and GraphPad Prism 8. To determine statistical significance, a two-tailed Student’s ***t***-test was used for comparisons between two groups. A Mann-Whitney ***U*** test was used for non-parametric comparisons. Detailed information on statistical tests and replicates is provided in each figure legend. Significance is annotated as ns: not significant, *: *p* ≤ 0.05, **: *p* ≤ 0.01, and ***: *p* ≤ 0.001.

**Supplementary Materials**

Figs. S1 to S7

Table S1 to S2

**Acknowledgments**

This work was supported by a National Research Foundation (NRF) grant of Korea funded by the Ministry of Education (2021R1I1A2057945), the Ministry of Science & ICT (2710080467, 2021R1A2C1012477), the National Research Council of Science & Technology (NST) grant (GTL24021-000), and the Korea Research Institute of Bioscience and Biotechnology (KRIBB) Research Initiative Program (KGM9942623).

**Author Contributions**

Conceptualization: J.L, S.-K.P. Methodology: Y.R.J., K.M.N., L.Y., J.L., M.-R.S., H.L., S.-K.P. Investigation: Y.R.J., K.M.N., L.Y., J.L., M.-R.S., H.L. Visualization: Y.R.J., K.M.N., L.Y., M.-R.S., H.L., S.-K.P. Funding acquisition: J.L, S.-K.P. Project administration: J.L., H.H., K.K.K., S.-K.P. Supervision: K.K.K., S.-K.P. Writing – original draft: S.-K.P. Writing – review & editing: Y.R.J., K.M.N., L.Y., J.L., M.-R.S., H.L., H.H., K.K.K., S.-K.P.

**Conflict of Interest**

The authors declare that they have no competing interests.

**Availability of Data and Materials**

Data deposition: Quantseq 3’ mRNA-seq data from this study (Fig. 6) are available at the Gene Expression Omnibus under accession no. GSE318696. (<https://www.ncbi.nlm.nih.gov/geo/>) Further information and requests for resources and reagents should be directed to and will be fulfilled by the lead contact, Sung-Kyun Park (skpark@kribb.re.kr).

**Figure legends**

**Fig. 1: Inhibition of O-GlcNAcylation in stimulated B cells impairs antibody production.**

**A** Representative immunoblot showing global O-GlcNAc levels in naïve splenic B cells (CD43⁻CD11b⁻) isolated from mice. Cells were either left unstimulated or stimulated for 72 h with CD40L, IL-4, and IL-21, in the presence or absence of O-GlcNAc–modulating compounds, including the OGA inhibitor Thiamet G or the OGT inhibitor OSMI-1. Quantification of relative O-GlcNAc signal intensities is shown on the right. **B** ELISA quantification of IgM (left) and IgG1 (right) levels in culture supernatants from cells treated as in (**A**). **C** Representative immunoblot showing global O-GlcNAc levels in naïve splenic B cells (CD43⁻CD11b⁻) stimulated for 72 h with LPS, in the presence or absence of Thiamet G or OSMI-1. Quantification of relative O-GlcNAc signal intensities is shown on the right. **D** ELISA quantification of IgM secretion in culture supernatants from LPS-stimulated B cells treated as in (**C**). **E** Representative immunoblot showing global O-GlcNAc levels in naïve splenic B cells stimulated for 72 h with LPS and TGF-β, in the presence or absence of Thiamet G or OSMI-1. Quantification of relative O-GlcNAc signal intensities is shown on the right. **F** ELISA quantification of IgM (left) and IgA (right) secretion in culture supernatants from cells treated as in (**E**). For all immunoblots, β-actin was used as a loading control for normalization. All data are presented as mean ± S.D. from three independent experiments. Statistical significance was determined by a two-tailed Student’s t-test (ns: not significant, *: p < 0.05, **: p < 0.01, ***: p < 0.001).

**Fig. 2: O-GlcNAcylation supports antibody production by sustaining B-cell expansion and IgH transcriptional programs under cytokine stimulation**

**A** Cell growth of naïve splenic B cells (CD43⁻CD11b⁻) stimulated for 72 h with CD40L, IL-4, and IL-21 in the presence or absence of O-GlcNAc–modulating compounds, including Thiamet G (OGA inhibitor) or OSMI-1 (OGT inhibitor). **B** Representative immunoblot analysis of global O-GlcNAc levels and c-Myc protein expression under the stimulation conditions described in (**A**). **C** Quantification of c-Myc band intensities shown in (**B**), normalized to β-actin as a loading control. **D** RT–qPCR analysis of *Ccna2* (Cyclin A2) mRNA expression, a canonical transcriptional target of c-Myc, normalized to *Gapdh*. **E** Schematic representation of the immunoglobulin heavy-chain (IgH) constant-region locus, indicating the relative positions of primer sets used to detect germline and post-class-switch recombination (post-CSR) transcripts. Green and red arrows denote primers for germline and post-CSR transcripts, respectively. **F–J** RT–qPCR analysis of IgH transcripts in naïve B cells treated as in (**A**). Relative mRNA expression of germline IgG1 (**F**), post-CSR IgG1 (**G**), IgM (germline only) (**H**), germline IgE (**I**), and post-CSR IgE (**J**). All values were normalized to *Gapdh*. **K** ELISA analysis of secreted IgE levels in culture supernatants from naïve B cells treated as in (**A**). **L–M** RT–qPCR analysis of *Prdm1* (BLIMP-1) (**L**) and *Aicda* (AID) (**M**) mRNA expression in naïve B cells treated as in (A), normalized to *Gapdh*. All data are presented as mean ± S.D. from three independent experiments. Statistical significance was determined by a two-tailed Student’s t-test (ns: not significant, *: p < 0.05, **: p < 0.01, ***: p < 0.001).

**Fig. 3: O-GlcNAcylation sustains B-cell activation, survival, and antibody production in CH12F3-2A cells**

**A** Representative flow cytometric analysis of IgA class-switch recombination in CH12F3-2A cells stained with IgM–PE-Cy7 and IgA–APC 48 h after stimulation with LPS, IL-4, and TGF-β. Quantification of IgM⁻IgA⁺ cells is shown on the right. **B** RT–qPCR analysis of plasmablast differentiation markers *Prdm1* (BLIMP1), *Irf4*, and *Sdc1* (CD138) in CH12F3-2A cells treated as in (**A**). Expression levels were normalized to *Gapdh*. **C** Representative immunoblot analysis of global O-GlcNAc levels and protein expression of IgM and IgA in CH12F3-2A cells stimulated for 48 h with LPS, IL-4, and TGF-β in the presence or absence of Thiamet G (OGA inhibitor) or OSMI-1 (OGT inhibitor). **D** Quantification of band intensities shown in (**C**), normalized to β-actin. **E** ELISA analysis of secreted IgA levels in culture supernatants from CH12F3-2A cells treated as in (**C**). **F** Total cell numbers of CH12F3-2A cells stimulated for 48 h with LPS, IL-4, and TGF-β in the presence or absence of OSMI-1 (left), and quantification of propidium iodide(PI)–positive dead cells (right). **G** Representative immunoblot analysis of O-GlcNAc and c-Myc protein expression in CH12F3-2A cells stimulated as in (**F**). Quantification is shown on the right. **H** RT–qPCR analysis of *Ccnd2* (Cyclin D2) and *Lef1* mRNA expression levels in CH12F3-2A cells treated as in (**F**), normalized to *Gapdh*. **I** Schematic representation of the immunoglobulin heavy-chain (IgH) constant-region locus indicating primer positions used to detect germline and post–class-switch recombination (post-CSR) transcripts. **J** RT–qPCR analysis of germline IgA (left) and post-CSR IgA (right) transcripts in CH12F3-2A cells stimulated for 48 h with LPS, IL-4, and TGF-β in the presence or absence of OSMI-1. **K** RT–qPCR analysis of unswitched IgM transcripts under the same conditions as in (**J**). For all immunoblots, β-actin was used as a loading control. Data are presented as mean ± S.D. from three independent experiments. Statistical significance was determined using a two-tailed Student’s t-test (ns: not significant, *: p < 0.05, **: p < 0.01, ***: p < 0.001).

**Fig. 4: O-GlcNAcylation preserves OCT-1 and OCA-B protein stability in B cells**

**A** Schematic overview of the WGA (wheat-germ agglutinin) lectin–based pull-down strategy used to enrich O-GlcNAcylated proteins from B-cell lysates. **B** Representative immunoblot analysis demonstrating the presence of OCT-1 and OCA-B in WGA-enriched protein fractions isolated from CH12F3-2A cells. **C** Co-immunoprecipitation analysis showing physical association between OCT-1 and OCA-B in CH12F3-2A cells. Cell lysates were immunoprecipitated with anti–OCT-1 antibodies and probed for OCT-1, OCA-B and β-actin. **D** RT–qPCR analysis of *Pou2f1* (OCT-1) and *Pou2af1* (OCA-B) mRNA expression in CH12F3-2A cells treated for 24 h with Thiamet G (OGA inhibitor) or OSMI-1 (OGT inhibitor). Expression levels were normalized to *Gapdh*. **E** Representative immunoblot analysis of global O-GlcNAc levels, OCT-1, and OCA-B protein expression in CH12F3-2A cells treated as in (**D**). **F** Quantification of protein expression levels shown in (**E**), normalized to β-actin. **G** Representative immunoblot analysis of O-GlcNAc, OCT-1, and OCA-B protein levels in CH12F3-2A cells following siRNA-mediated OGT knockdown (siOGT). **H** Quantification of protein expression levels shown in (**G**), normalized to β-actin. **I** Representative immunoblot analysis of OCT-1 and OCA-B protein expression in primary naive splenic B cells (CD43⁻CD11b⁻) stimulated *ex vivo* under the cytokine conditions described in Fig. 1A, in the presence or absence of OGT inhibition. **J** Quantification of OCT-1 and OCA-B protein levels shown in (**I**), normalized to β-actin. For all immunoblots, β-actin was used as a loading control. Data are presented as mean ± S.D. from three independent experiments. Statistical significance was determined using a two-tailed Student’s t-test (ns: not significant, *: p < 0.05, **: p < 0.01, ***: p < 0.001).

**Fig. 5: Loss of O-GlcNAcylation destabilizes OCA-B and disrupts plasmablast-associated transcriptional programs**

**A** Schematic representation of the OCA-B serine-to-alanine substitution at residue 130 (S130A), a site predicted to undergo O-GlcNAc modification based on glycoproteomic databases. **B** Representative immunoblot showing expression of FLAG-tagged OCA-B (WT or S130A) in CH12F3-2A cells. GFP was co-expressed as a transfection efficiency control. Quantification of relative OCA-B protein abundance is shown on the right, normalized to GFP and β-actin. **C** RT–qPCR analysis of FLAG-tagged OCA-B mRNA expression in cells transfected with WT or S130A constructs. Expression levels were normalized to *Gapdh*. **D** RT–qPCR analysis of differentiation-associated genes [*Prdm1* (BLIMP1), *Irf4*, *Sdc1* (CD138), and *Bcl6*) in CH12F3-2A cells stimulated with LPS, IL-4, and TGF-β in the presence or absence of OSMI-1. Expression levels were normalized to *Gapdh*. **E** Representative immunoblot analysis of OCT-1 and OCA-B protein expression in CH12F3-2A cells treated as in (**D**). Quantification of relative protein abundance is shown on the right. **F** Representative immunoblot showing O-GlcNAc levels and protein expression of IgM, IgA, c-Myc and OCA-B following siRNA-mediated OCA-B knockdown (siOCA-B) in CH12F3-2A cells. **G** Quantification of protein expression levels shown in (**F**), normalized to loading controls. **H** RT–qPCR analysis of *Prdm1* (BLIMP1) mRNA expression following OCA-B knockdown. **I** ELISA quantification of IgA secretion from CH12F3-2A cells treated as in (**F**). **J–L** RT–qPCR analysis of immunoglobulin transcripts in CH12F3-2A cells treated as in (**F**). Relative mRNA levels of germline IgA (**J**), post-switch IgA (**K**), and IgM (**L**) were normalized to *Gapdh*. **M** Quantification of cell accumulation in CH12F3-2A cells following OCA-B knockdown.

β-actin or GAPDH was used as a loading control for immunoblot normalization. Data are presented as mean ± SD from three independent experiments. Statistical significance was assessed using a two-tailed Student’s t-test (ns: not significant, *: p < 0.05, **: p < 0.01, ***: p < 0.001).

**Fig. 6. Transcriptomic impact of O-GlcNAc inhibition and OCA-B depletion during B-cell activation**

**A** Schematic overview of the experimental design for QuantSeq 3′ mRNA sequencing in naive splenic B cells (CD43⁻CD11b⁻) stimulated with CD40 ligand, IL-4, and IL-21 in the presence of OGT inhibition (OSMI-1) or siRNA-mediated OCA-B depletion. **B, C** Volcano plots depicting differentially expressed genes (DEGs) in OSMI-1–treated cells versus DMSO controls (**B**) and siOCA-B–transfected cells versus siRNA negative controls (siNC) (**C**). Genes meeting the criteria of fold change ≥ 1.3 and *P* < 0.05 are shown. The top 10 upregulated (red) and downregulated (blue) genes are labeled. **D, E** Gene ontology (GO) enrichment analysis of total DEGs identified in OSMI-1–treated (**D**) and siOCA-B–transfected (**E**) B cells. Bar graphs represent gene counts for the top-ranked biological process categories. **F, G** B cell program–focused GO enrichment analysis of DEGs in OSMI-1–treated (**F**) and siOCA-B–transfected (**G**) cells, highlighting pathways related to B-cell activation, differentiation, and proliferation. **H** Heatmap showing representative genes associated with B-cell activation, differentiation, proliferation, germinal center–related programs, and plasma-cell differentiation that are commonly regulated under both OSMI-1 treatment and OCA-B depletion. Relative expression levels are presented as log₂ fold changes compared with respective controls (DMSO or siNC). Color scale indicates relative up- or downregulation.

**Fig. 7: Systemic O-GlcNAc inhibition selectively impairs antigen-specific B-cell responses *in vivo***

**A** Experimental design for *in vivo* OGT inhibition during NP-CGG immunization. Six-week-old male C57BL/6 mice were immunized with NP-CGG in alum and administered vehicle or OSMI-1 (1 mg/day) by intraperitoneal injection for 7 consecutive days. **B** Representative immunoblot showing O-GlcNAc (RL2), IgM, OCT-1, and OCA-B protein levels in splenic B cells isolated from vehicle- or OSMI-1–treated mice. **C** Quantification of protein abundance shown in B, normalized to GAPDH. Data are presented as mean ± SD (*n* = 5). **D** Representative ELISpot images (top) and quantification (bottom) of NP(8)-specific IgG antibody-secreting cells (ASCs) per 10⁷ splenocytes isolated from immunized mice. Statistical significance was assessed by Mann–Whitney U test. **E, F** ELISpot analysis of NP(30)-specific (**E**) and NP(8)-specific (**F**) IgG ASCs following *ex vivo* culture of splenocytes at equal cell numbers in the presence or absence of OSMI-1. Representative images are shown on the left, with quantification of ASC numbers and spot intensity on the right. **G** Total splenocyte numbers recovered from vehicle- or OSMI-1–treated mice. **H–K** Flow cytometric analysis of splenic immune populations. Frequencies of CD45⁺ leukocytes (**H**), CD45⁺B220⁺ B cells (**I**), germinal center B cells (B220⁺GL7⁺CD95⁺) (**J**), and plasma cells (B220lowCD138⁺) (**K**) within total splenocytes are shown. Gating strategies are provided in Fig. S7. All data are presented as mean ± SD. Statistical significance was determined using two-tailed Student’s t-test unless otherwise indicated (ns, not significant; *P < 0.05; **P < 0.01; ***P < 0.001).

**Fig. S1. *Irf4* and *Bcl6* transcript levels in cytokine-stimulated B cells under O-GlcNAc–modulating conditions**

Real-time RT-qPCR analysis of *Irf4* and *Bcl6* mRNA expression levels in naive B (CD43-CD11b-) cells. The cells were stimulated for 72 hours with CD40L, IL-4, and IL-21 in the presence or absence of O-GlcNAcylation inhibitors, including Thiamet G (OGA inhibitor) or OSMI-1 (OGT inhibitor). The results were normalized to *Gapdh.* Data are presented as mean ± S.D. from three independent experiments. Statistical significance was determined by a two-tailed Student’s t-test (ns: not significant, *: p < 0.05, **: p < 0.01, ***: p < 0.001).

**Fig. S2. Inhibition of O-GlcNAcylation by OGT inhibitor impairs the binding affinity of OCT-1 to the *IgH* gene promoter.**

**A** Representative western blot showing O-GlcNAc levels in CH12F3-2A cells treated with or without OSMI-1(OGT inhibitor). **B** ChIP-qPCR assay using α-OCT-1 antibody, showing changes in OCT-1 binding to the *IgH* gene promoter in CH12F3-2A cells. Quantitative data for the enrichment of OCT-1 at the *IgH* gene promoter are presented as the relative input ratio following normalization against the *Actg1* promoter region. Data are presented as mean ± S.D. from three independent experiments. Statistical significance was determined by a two-tailed Student’s t-test (ns: not significant, *: p < 0.05, **: p < 0.01, ***: p < 0.001).

**Fig. S3: Proteasome inhibition prevents O-GlcNAc–dependent loss of OCT-1 and OCA-B in CH12F3-2A cells**

Representative immunoblot showing O-GlcNAc, ubiquitin, OCT-1, and OCA-B protein levels in CH12F3-2A cells treated with or without the OGT inhibitor OSMI-1, in the presence or absence of the proteasome inhibitor MG132. Accumulation of ubiquitinated proteins was assessed to verify effective proteasome inhibition by MG132. These data support the involvement of proteasome-dependent degradation in the reduction of OCT-1 and OCA-B under O-GlcNAc–inhibited conditions.

**Fig. S4: O-GlcNAcylation maintains OCT-1 and OCA-B protein levels in activated primary B cells**

**A** Representative immunoblot showing OCT-1 and OCA-B protein expression levels in naive splenic B cells (CD43⁻CD11b⁻) stimulated with LPS for 72 h in the presence or absence of O-GlcNAcylation-modulating compounds, including Thiamet G (OGA inhibitor) or OSMI-1 (OGT inhibitor). Quantification of relative band intensities is shown below. **B** Representative immunoblot showing OCT-1 and OCA-B protein expression levels in naïve splenic B cells stimulated with LPS and TGF-β for 72 h under the same treatment conditions as in (A). Quantification of relative band intensities is shown below. β-actin was used as a loading control for normalization. Data are presented as mean ± S.D. from three independent experiments. Statistical significance was determined by a two-tailed Student’s *t*-test (ns: not significant, *: p < 0.05, **: p < 0.01, ***: p < 0.001).

**Fig. S5: OCA-B S130A mutation reduces protein abundance without affecting transcript levels in HEK293T cells**

**A** Representative immunoblot showing overexpressed FLAG-tagged OCA-B wild-type (WT) or S130A mutant proteins in HEK293T cells. Quantification of relative band intensities is shown on the right. **B** Real-time RT–qPCR analysis of FLAG-tagged OCA-B–specific mRNA expression levels in HEK293T cells transfected with WT or S130A constructs. Transcript levels were normalized to *Gapdh*. All data are presented as mean ± S.D. from three independent experiments. Statistical significance was determined by a two-tailed Student’s t-test (ns: not significant, *: p < 0.05, **: p < 0.01, ***: p < 0.001).

**Fig. S6: Shared transcriptional programs downregulated by O-GlcNAc inhibition and OCA-B depletion**

**A-C** Heatmaps showing representative genes across selected biological programs that are commonly regulated in both OSMI-1–treated and siOCA-B–transfected B cells. Relative gene expression levels are displayed as log2 fold changes (log2 FC) compared with the corresponding control conditions (DMSO or siNC). The color scale indicates relative upregulation (red) or downregulation (blue).

**Fig. S7: Flow cytometric gating strategies and representative plots for splenic immune cell subsets**

**A** Gating strategy used to identify major splenic immune cell populations. Total splenocytes were sequentially gated for singlets (FSC-H vs. FSC-A), CD45⁺ leukocytes, and subsequently subdivided into T cells (CD45⁺CD3ε⁺), myeloid-enriched cells (CD45⁺CD11b⁺), and B-cell subsets based on the indicated surface markers. **B, C** Flow cytometric quantification of major splenic immune populations. Shown are the percentages of CD45⁺CD3ε⁺ T cells (**B**) and CD45⁺CD11b⁺ myeloid-enriched cells (**C**) within total splenocytes. Data are presented as mean ± S.D. Statistical significance was determined by a two-tailed Student’s t-test (ns: not significant, *: p < 0.05, **: p < 0.01, ***: p < 0.001). **D** Representative flow cytometric plots identifying germinal center (GC) B cells. Splenocytes were stained for B220, GL7, and CD95 (Fas), and GC B cells were defined as B220⁺GL7⁺CD95⁺. Individual plots from four representative mice per group (#1–#4) are shown. These data correspond to the quantification presented in Fig. 7J. **E** Representative flow cytometric plots identifying plasma cells. Splenocytes were stained for B220 and CD138, and plasma cells were defined as B220lowCD138⁺. Individual plots from four representative mice per group (#1–#4) are shown. These data correspond to the quantification presented in Fig. 7K.

**REFERENCES**

1. Elsner RA, Shlomchik MJ. Germinal Center and Extrafollicular B Cell Responses in Vaccination, Immunity, and Autoimmunity. Immunity. 2020;53(6):1136-50.

2. Shlomchik MJ, Weisel F. Germinal center selection and the development of memory B and plasma cells. Immunol Rev. 2012;247(1):52-63.

3. Victora GD, Nussenzweig MC. Germinal centers. Annu Rev Immunol. 2012;30:429-57.

4. Mesin L, Ersching J, Victora GD. Germinal Center B Cell Dynamics. Immunity. 2016;45(3):471-82.

5. Lin TY, Hung NK, Hung SC. Association of malnutrition with SARS-CoV-2 vaccine response in patients undergoing hemodialysis. Clin Nutr. 2022;41(12):2683-90.

6. Prendergast AJ. Malnutrition and vaccination in developing countries. Philos Trans R Soc Lond B Biol Sci. 2015;370(1671).

7. Rytter MJ, Kolte L, Briend A, Friis H, Christensen VB. The immune system in children with malnutrition--a systematic review. PLoS One. 2014;9(8):e105017.

8. Boothby MR, Brookens SK, Raybuck AL, Cho SH. Supplying the trip to antibody production-nutrients, signaling, and the programming of cellular metabolism in the mature B lineage. Cell Mol Immunol. 2022;19(3):352-69.

9. Waters LR, Ahsan FM, Wolf DM, Shirihai O, Teitell MA. Initial B Cell Activation Induces Metabolic Reprogramming and Mitochondrial Remodeling. iScience. 2018;5:99-109.

10. Johnstone JC, Yazicioglu YF, Clarke AJ. Fuelling B cells: dynamic regulation of B cell metabolism. Curr Opin Immunol. 2024;91:102484.

11. Fu Y, Wang L, Yu B, Xu D, Chu Y. Immunometabolism shapes B cell fate and functions. Immunology. 2022;166(4):444-57.

12. Hart GW, Housley MP, Slawson C. Cycling of O-linked beta-N-acetylglucosamine on nucleocytoplasmic proteins. Nature. 2007;446(7139):1017-22.

13. Hart GW, Slawson C, Ramirez-Correa G, Lagerlof O. Cross talk between O-GlcNAcylation and phosphorylation: roles in signaling, transcription, and chronic disease. Annu Rev Biochem. 2011;80:825-58.

14. Yang X, Qian K. Protein O-GlcNAcylation: emerging mechanisms and functions. Nat Rev Mol Cell Biol. 2017;18(7):452-65.

15. Lund PJ, Elias JE, Davis MM. Global Analysis of O-GlcNAc Glycoproteins in Activated Human T Cells. J Immunol. 2016;197(8):3086-98.

16. Wu JL, Wu HY, Tsai DY, Chiang MF, Chen YJ, Gao S, et al. Temporal regulation of Lsp1 O-GlcNAcylation and phosphorylation during apoptosis of activated B cells. Nat Commun. 2016;7:12526.

17. Oh SC, Jeon BC, Jang IH, Song MR, Hwang H, An D, et al. Genetic manipulation of OGT enhances NK cell-mediated cytotoxicity in tumor immunity. J Adv Res. 2025.

18. Swamy M, Pathak S, Grzes KM, Damerow S, Sinclair LV, van Aalten DM, et al. Glucose and glutamine fuel protein O-GlcNAcylation to control T cell self-renewal and malignancy. Nat Immunol. 2016;17(6):712-20.

19. Chang YH, Weng CL, Lin KI. O-GlcNAcylation and its role in the immune system. J Biomed Sci. 2020;27(1):57.

20. Ramakrishnan P. O-GlcNAcylation and immune cell signaling: A review of known and a preview of unknown. J Biol Chem. 2024;300(6):107349.

21. Wu JL, Chiang MF, Hsu PH, Tsai DY, Hung KH, Wang YH, et al. O-GlcNAcylation is required for B cell homeostasis and antibody responses. Nat Commun. 2017;8(1):1854.

22. Lee DH, Kwon NE, Lee WJ, Lee MS, Kim DJ, Kim JH, et al. Increased O-GlcNAcylation of c-Myc Promotes Pre-B Cell Proliferation. Cells. 2020;9(1).

23. Jeon BC, Kim YJ, Park AK, Song MR, Na KM, Lee J, et al. Dynamic O-GlcNAcylation governs long-range chromatin interactions in V(D)J recombination during early B-cell development. Cell Mol Immunol. 2025;22(1):68-82.

24. Kim U, Qin XF, Gong S, Stevens S, Luo Y, Nussenzweig M, et al. The B-cell-specific transcription coactivator OCA-B/OBF-1/Bob-1 is essential for normal production of immunoglobulin isotypes. Nature. 1996;383(6600):542-7.

25. Teitell MA. OCA-B regulation of B-cell development and function. Trends Immunol. 2003;24(10):546-53.

26. Song S, Cao C, Choukrallah MA, Tang F, Christofori G, Kohler H, et al. OBF1 and Oct factors control the germinal center transcriptional program. Blood. 2021;137(21):2920-34.

27. Nakamura M, Kondo S, Sugai M, Nazarea M, Imamura S, Honjo T. High frequency class switching of an IgM+ B lymphoma clone CH12F3 to IgA+ cells. Int Immunol. 1996;8(2):193-201.

28. Reya T, O'Riordan M, Okamura R, Devaney E, Willert K, Nusse R, et al. Wnt signaling regulates B lymphocyte proliferation through a LEF-1 dependent mechanism. Immunity. 2000;13(1):15-24.

29. Choi SY, Pi JH, Park SK, Kang CJ. Crlz-1 Controls Germinal Center Reaction by Relaying a Wnt Signal to the Bcl-6 Expression in Centroblasts during Humoral Immune Responses. J Immunol. 2019;203(10):2630-43.

30. Zachara NE, Vosseller K, Hart GW. Detection and analysis of proteins modified by O-linked N-acetylglucosamine. Curr Protoc Mol Biol. 2011;Chapter 17:Unit 17 6.

31. Gstaiger M, Knoepfel L, Georgiev O, Schaffner W, Hovens CM. A B-cell coactivator of octamer-binding transcription factors. Nature. 1995;373(6512):360-2.

32. Kang J, Shen Z, Lim JM, Handa H, Wells L, Tantin D. Regulation of Oct1/Pou2f1 transcription activity by O-GlcNAcylation. FASEB J. 2013;27(7):2807-17.

33. Schubart DB, Rolink A, Kosco-Vilbois MH, Botteri F, Matthias P. B-cell-specific coactivator OBF-1/OCA-B/Bob1 required for immune response and germinal centre formation. Nature. 1996;383(6600):538-42.

34. Schubart K, Massa S, Schubart D, Corcoran LM, Rolink AG, Matthias P. B cell development and immunoglobulin gene transcription in the absence of Oct-2 and OBF-1. Nat Immunol. 2001;2(1):69-74.

35. Hou C, Li W, Li Y, Ma J. O-GlcNAcAtlas 4.0: An Updated Protein O-GlcNAcylation Database with Site-specific Quantification. J Mol Biol. 2025;437(15):169033.

36. Yamada I, Shiota M, Shinmachi D, Ono T, Tsuchiya S, Hosoda M, et al. The GlyCosmos Portal: a unified and comprehensive web resource for the glycosciences. Nat Methods. 2020;17(7):649-50.

37. Jin ZX, Kishi H, Wei XC, Matsuda T, Saito S, Muraguchi A. Lymphoid enhancer-binding factor-1 binds and activates the recombination-activating gene-2 promoter together with c-Myb and Pax-5 in immature B cells. J Immunol. 2002;169(7):3783-92.

38. Wang H, Lee CH, Qi C, Tailor P, Feng J, Abbasi S, et al. IRF8 regulates B-cell lineage specification, commitment, and differentiation. Blood. 2008;112(10):4028-38.

39. Sellars M, Kastner P, Chan S. Ikaros in B cell development and function. World J Biol Chem. 2011;2(6):132-9.

40. Yoon J, Wang H, Kim YC, Yoshimoto M, Abbasi S, Morse Iii HC. Plasma cell alloantigen ENPP1 is expressed by a subset of human B cells with potential regulatory functions. Immunol Cell Biol. 2016;94(8):719-28.

41. Thomas MD, Kremer CS, Ravichandran KS, Rajewsky K, Bender TP. c-Myb is critical for B cell development and maintenance of follicular B cells. Immunity. 2005;23(3):275-86.

42. Zhong Y, Jiang L, Hiai H, Toyokuni S, Yamada Y. Overexpression of a transcription factor LYL1 induces T- and B-cell lymphoma in mice. Oncogene. 2007;26(48):6937-47.

43. Shen X, Chen J, Qiu R, Fan X, Xin Y. Effect of camptothecin on inducible nitric oxide synthase expression in the colon cancer SW480 cell line. Oncol Lett. 2015;10(5):3157-60.

44. Salas M, Eckhardt LA. Critical role for the Oct-2/OCA-B partnership in Ig-secreting cells. J Immunol. 2003;171(12):6589-98.

45. Hodson DJ, Shaffer AL, Xiao W, Wright GW, Schmitz R, Phelan JD, et al. Regulation of normal B-cell differentiation and malignant B-cell survival by OCT2. Proc Natl Acad Sci U S A. 2016;113(14):E2039-46.

46. Dunbar CL, Aukema HM, Calder PC, Gibson DL, Henrickson SE, Khan S, et al. Nutrition and immunity: perspectives on key issues and next steps. Appl Physiol Nutr Metab. 2023;48(7):484-97.

47. Zimmermann P, Curtis N. Factors That Influence the Immune Response to Vaccination. Clin Microbiol Rev. 2019;32(2).

48. Calder PC. Nutrition and immunity: lessons for COVID-19. Eur J Clin Nutr. 2021;75(9):1309-18.

49. Wang VE, Tantin D, Chen J, Sharp PA. B cell development and immunoglobulin transcription in Oct-1-deficient mice. Proc Natl Acad Sci U S A. 2004;101(7):2005-10.

50. Di Bartolo DL, Hyjek E, Keller S, Guasparri I, Deng H, Sun R, et al. Role of defective Oct-2 and OCA-B expression in immunoglobulin production and Kaposi's sarcoma-associated herpesvirus lytic reactivation in primary effusion lymphoma. J Virol. 2009;83(9):4308-15.

51. Ruan HB, Nie Y, Yang X. Regulation of protein degradation by O-GlcNAcylation: crosstalk with ubiquitination. Mol Cell Proteomics. 2013;12(12):3489-97.

52. Chou TY, Hart GW, Dang CV. c-Myc is glycosylated at threonine 58, a known phosphorylation site and a mutational hot spot in lymphomas. J Biol Chem. 1995;270(32):18961-5.

53. Chu CS, Lo PW, Yeh YH, Hsu PH, Peng SH, Teng YC, et al. O-GlcNAcylation regulates EZH2 protein stability and function. Proc Natl Acad Sci U S A. 2014;111(4):1355-60.

54. Yang WH, Kim JE, Nam HW, Ju JW, Kim HS, Kim YS, et al. Modification of p53 with O-linked N-acetylglucosamine regulates p53 activity and stability. Nat Cell Biol. 2006;8(10):1074-83.

55. Betzler AC, Ezic J, Abou Kors T, Hoffmann TK, Wirth T, Brunner C. T Cell Specific BOB.1/OBF.1 Expression Promotes Germinal Center Response and T Helper Cell Differentiation. Front Immunol. 2022;13:889564.

56. Yanagi M, Ikegami I, Kamekura R, Sato T, Sato T, Kamiya S, et al. Bob1 maintains T follicular helper cells for long-term humoral immunity. Commun Biol. 2024;7(1):185.

57. Kearse KP, Hart GW. Lymphocyte activation induces rapid changes in nuclear and cytoplasmic glycoproteins. Proc Natl Acad Sci U S A. 1991;88(5):1701-5.

58. Mayberry CL, Logan NA, Wilson JJ, Chang CH. Providing a Helping Hand: Metabolic Regulation of T Follicular Helper Cells and Their Association With Disease. Front Immunol. 2022;13:864949.

59. Thomas-Claudepierre AS, Schiavo E, Heyer V, Fournier M, Page A, Robert I, et al. The cohesin complex regulates immunoglobulin class switch recombination. J Exp Med. 2013;210(12):2495-502.

60. Stavnezer J, Schrader CE. IgH chain class switch recombination: mechanism and regulation. J Immunol. 2014;193(11):5370-8.

61. Feldman S, Wuerffel R, Achour I, Wang L, Carpenter PB, Kenter AL. 53BP1 Contributes to Igh Locus Chromatin Topology during Class Switch Recombination. J Immunol. 2017;198(6):2434-44.

62. Hiromura M, Choi CH, Sabourin NA, Jones H, Bachvarov D, Usheva A. YY1 is regulated by O-linked N-acetylglucosaminylation (O-glcNAcylation). J Biol Chem. 2003;278(16):14046-52.

63. Jozwiak P, Forma E, Brys M, Krzeslak A. O-GlcNAcylation and Metabolic Reprograming in Cancer. Front Endocrinol (Lausanne). 2014;5:145.

64. Wang A, Young M, Jiang J. The Glyco-Switch of life: O-GlcNAcylation in cell fate decision. Glycobiology. 2025;35(11).

65. Ciabattini A, Nardini C, Santoro F, Garagnani P, Franceschi C, Medaglini D. Vaccination in the elderly: The challenge of immune changes with aging. Semin Immunol. 2018;40:83-94.

66. Haas RH. Mitochondrial Dysfunction in Aging and Diseases of Aging. Biology (Basel). 2019;8(2).

67. Kim HH, Dixit VD. Metabolic regulation of immunological aging. Nat Aging. 2025;5(8):1425-40.

68. Banerjee PS, Lagerlof O, Hart GW. Roles of O-GlcNAc in chronic diseases of aging. Mol Aspects Med. 2016;51:1-15.

69. Ma J, Hart GW. Protein O-GlcNAcylation in diabetes and diabetic complications. Expert Rev Proteomics. 2013;10(4):365-80.

70. Mojaddidi MA, Aboonq M, Alqahtani SA. Glycemic control and vaccine response: the role of mucosal immunity after vaccination in diabetic patients. Front Immunol. 2025;16:1577523.

71. Kinoshita K, Harigai M, Fagarasan S, Muramatsu M, Honjo T. A hallmark of active class switch recombination: transcripts directed by I promoters on looped-out circular DNAs. Proc Natl Acad Sci U S A. 2001;98(22):12620-3.

72. Chen S, Zhou Y, Chen Y, Gu J. fastp: an ultra-fast all-in-one FASTQ preprocessor. Bioinformatics. 2018;34(17):i884-i90.

73. Dobin A, Davis CA, Schlesinger F, Drenkow J, Zaleski C, Jha S, et al. STAR: ultrafast universal RNA-seq aligner. Bioinformatics. 2013;29(1):15-21.

74. Liao Y, Smyth GK, Shi W. featureCounts: an efficient general purpose program for assigning sequence reads to genomic features. Bioinformatics. 2014;30(7):923-30.

75. Robinson MD, McCarthy DJ, Smyth GK. edgeR: a Bioconductor package for differential expression analysis of digital gene expression data. Bioinformatics. 2010;26(1):139-40.
