# Supplementary material
Source: Research Square preprint supplement (doi:10.21203/rs.3.rs-8924149/v1)
Supplement: Supplementary file 4 [file db5b03aa563d9f64802f9fe2.xlsx]

## Sheet: Table S2-1.
Table S2-1. Total gene lists in naive B cells treated with or without OSMI-1(OGT inhibitor) (Normalized data ≥1)
P-values were calculated using the Welch's t-test. q-values were calculated using the FDR(Benjamini Hochberg)
	Average of normalized data (Log 2)		Log2 fold change
Gene name	DMSO	OSMI-1	OSMI-1/DMSO	p-value	q-value
Pacsin1	9.592	8.234	0.39	0.000121111	1
Neil1	6.774	4.796	0.254	0.000175651	1
Irf9	5.846	4.897	0.518	0.000269735	1
Lef1	5.663	4.054	0.328	0.000281987	1
Snhg15	6.375	8.364	3.968	0.000289519	1
Slx1b	1.578	3.204	3.087	0.000412987	1
Arid5a	7.013	8.344	2.514	0.0004684	1
Atp6v1e1	7.181	7.07	0.926	0.000684178	1
9430062P05Rik	2.629	4.329	3.249	0.000817969	1
Aim2	5.708	5.057	0.637	0.000828773	1
Abcc1	4.648	5.922	2.419	0.00102699	1
Stx11	4.259	5.999	3.34	0.00103469	1
Aco1	3.643	4.486	1.793	0.0011011	1
Prkca	6.818	8.023	2.306	0.00111395	1
Brms1	3.835	4.859	2.033	0.00118193	1
Pomp	8.562	9.08	1.432	0.00123671	1
Neurl1b	4.694	1.444	0.105	0.00126703	1
Cep162	5.913	5.467	0.734	0.00133347	1
Nif3l1	3.835	2.673	0.447	0.00150463	1
Bsdc1	3.853	4.589	1.666	0.00155602	1
Sox4	8.334	5.248	0.118	0.00160029	1
Jakmip1	7.239	5.287	0.259	0.00162915	1
Slc25a19	9.163	8.266	0.537	0.00171492	1
Bcl9l	6.258	5.164	0.468	0.00172126	1
Sf3b5	6.384	6.848	1.379	0.00176739	1
Polr1g	4.418	5.499	2.116	0.00177265	1
Nop2	5.347	6.01	1.583	0.00180917	1
Dmac1	5.118	5.712	1.51	0.00181652	1
Larp1	8.722	8.437	0.821	0.00182836	1
Iscu	2.591	4.825	4.704	0.00182844	1
Gtpbp1	7.403	6.912	0.711	0.00185086	1
Tifa	5.467	2.709	0.148	0.00185122	1
Adgre5	6.479	5.624	0.553	0.00196485	1
Glt28d2	5.162	2.665	0.177	0.00215498	1
Trim59	4.297	3.039	0.418	0.002228	1
Mlh1	3.606	4.72	2.164	0.00222965	1
Fam117a	6.669	4.217	0.183	0.00226799	1
Spata24	4.945	3.801	0.452	0.00238479	1
Znhit3	2.227	3.062	1.784	0.00240387	1
Ctsz	7.846	8.64	1.734	0.0024287	1
Arl4c	4.307	5.414	2.154	0.00244803	1
Gm26129	1.344	2.473	2.186	0.00245618	1
Skp1	6.15	6.48	1.257	0.00256316	1
Rae1	6.113	6.844	1.66	0.0025657	1
Hmga1	5.489	4.038	0.366	0.00259033	1
Nmb	2.675	2.123	0.682	0.0027842	1
Syk	6.652	5.435	0.43	0.00281885	1
Atp5md	5.722	7.593	3.658	0.00287138	1
Slain2	6.176	5.742	0.74	0.00288434	1
Cyb5rl	3.14	3.878	1.667	0.00301893	1
Sdhb	7.147	7.677	1.444	0.00312028	1
Zzz3	4.35	6.047	3.241	0.00344143	1
Dnase2a	6.687	6.142	0.685	0.00346954	1
Otulin	7.943	8.569	1.544	0.00349932	1
Ikbkg	4.355	4.958	1.519	0.00353596	1
Dot1l	7.196	7.595	1.319	0.00353629	1
Champ1	4.846	5.211	1.288	0.00357105	1
Myl6	4.912	6.277	2.575	0.0036427	1
C1galt1	4.454	3.051	0.378	0.00373308	1
Dbf4	6.246	4.831	0.375	0.00380005	1
Themis2	3.93	4.542	1.528	0.00397293	1
Prrc2c	8.308	8.549	1.182	0.00407665	1
Ikzf1	8.846	7.731	0.462	0.00428245	1
Smc4	8.293	7.216	0.474	0.00430822	1
Slc45a4	4.638	3.683	0.516	0.00437831	1
Pias4	5.232	4.358	0.546	0.00462992	1
Ogfrl1	4.535	7.129	6.035	0.00468746	1
Slfn10-ps	4.826	3.691	0.455	0.00476304	1
Iqgap2	4.206	1.535	0.157	0.00490373	1
Enpp1	4.292	3.281	0.496	0.00494308	1
Arid1a	8.471	7.452	0.494	0.00495321	1
Rgs2	7.758	5.215	0.172	0.00500961	1
Lpl	3.365	4.959	3.019	0.00513905	1
Ltb	6.519	3.962	0.17	0.00535106	1
Gm23924	1.551	3.986	5.41	0.0054415	1
Gm47438	3.154	5.395	4.73	0.00547463	1
Ets1	7.147	5.089	0.24	0.00556353	1
Plekhg2	5.052	4.009	0.485	0.00560676	1
Prdm1	8.084	6.442	0.32	0.00565032	1
Zfand3	5.788	5.151	0.643	0.00565194	1
Paics	8.118	6.809	0.403	0.00582537	1
Golt1b	3.038	4.816	3.427	0.00582708	1
Ctsb	6.18	6.616	1.352	0.00588086	1
Ms4a6b	4.559	3.13	0.372	0.00599759	1
Rnf19b	7.492	8.924	2.699	0.00600215	1
Atad2	5.909	5.071	0.559	0.00608144	1
Dedd2	4.403	3.617	0.58	0.00627209	1
Cd63	6.478	7.051	1.488	0.00628762	1
Dok3	7.368	5.061	0.202	0.00632029	1
Prr11	4.521	2.763	0.296	0.00655291	1
Irf8	10.574	10.037	0.689	0.00660368	1
Slf1	4.364	3.327	0.487	0.00661229	1
Tspan13	7.258	6.471	0.58	0.00674792	1
Zc3h12c	3.266	5.692	5.372	0.00677939	1
B3gnt7	5.194	4.134	0.48	0.00679247	1
Ms4a4a	5.276	1.473	0.072	0.00697464	1
Vamp3	5.62	6.2	1.495	0.0069838	1
Anapc15	5.012	4.522	0.712	0.00702443	1
Ppip5k1	3.862	5.055	2.286	0.00708115	1
Ndufa9	5.811	6.334	1.437	0.00720276	1
Tbrg4	5.051	5.836	1.723	0.00731269	1
Irs2	7.471	5.384	0.235	0.00733177	1
Gm40860	3.906	1.065	0.14	0.00782228	1
Erdr1x_1	5.556	6.216	1.58	0.00789463	1
Rpl36	8.88	9.477	1.513	0.00789577	1
Dnajc16	3.305	4.818	2.855	0.00799493	1
Iqsec2	4.781	2.763	0.247	0.00822524	1
Taf15	6.316	6.486	1.125	0.00833886	1
Slc46a3	2.48	1.326	0.449	0.00836679	1
Copz1	6.62	7.152	1.446	0.00848614	1
Gm53938	1.434	2.141	1.631	0.00850294	1
Hpgds	7.879	6.605	0.413	0.00854466	1
Rpl30	9.865	10.724	1.814	0.00861224	1
Mef2d	7.435	6.343	0.469	0.00866028	1
Itga6	5.853	4.495	0.39	0.00867029	1
Rbm12b1	1.859	2.56	1.626	0.00871061	1
Lxn	2.855	2.41	0.735	0.00889193	1
Ipo13	3.308	4.297	1.984	0.00889583	1
Atp1b1	6.68	4.084	0.165	0.00907142	1
Jund	10.017	10.151	1.097	0.00914082	1
Fas	5.232	5.809	1.492	0.00916966	1
Suz12	6.971	6.165	0.572	0.00917571	1
Bub1	3.953	2.903	0.483	0.00922497	1
Fam133b	6.154	7.072	1.889	0.00928385	1
Acin1	9.455	8.872	0.668	0.00952957	1
Rpusd4	4.471	4.786	1.244	0.00957577	1
Arhgef18	4.15	1.134	0.124	0.00967142	1
Lpxn	8.139	8.595	1.372	0.00968273	1
Dpy19l4	3.896	3.308	0.665	0.00975211	1
Api5	7.111	6.516	0.662	0.00990239	1
Cdc42ep3	4.782	3.248	0.345	0.00995896	1
Micos10	6.614	7.193	1.494	0.0099729	1
Nudt16l1	6.739	7.026	1.221	0.00998475	1
Glcci1	6.717	4.691	0.246	0.0100109	1
Stk24	6.844	6.393	0.732	0.0100345	1
Glrx3	6.109	6.79	1.603	0.0101489	1
Tomm22	6.293	6.901	1.524	0.0103151	1
Tpm3	7.717	8.061	1.269	0.0103197	1
Psma1	6.143	6.517	1.296	0.0105212	1
Dnajc2	6.946	7.33	1.304	0.0105447	1
Shisa5	9.809	8.79	0.493	0.0105852	1
Rnf115	5.199	5.793	1.509	0.0105901	1
Il4ra	8.739	10.076	2.527	0.0107373	1
Colgalt1	6.913	6.63	0.822	0.0107871	1
Atp13a2	6.274	5.599	0.627	0.010814	1
a	7.087	4.791	0.204	0.0108804	1
Lman2l	3.785	4.103	1.246	0.0109058	1
Maea	4.786	5.896	2.159	0.0110586	1
Birc2	6.342	7.471	2.186	0.0110676	1
Rbm47	6.812	4.925	0.27	0.0111291	1
Gsn	5.086	6.899	3.515	0.0111312	1
Trappc11	3.168	4.09	1.895	0.0111517	1
Sipa1l1	5.511	4.53	0.507	0.0114857	1
Il5ra	2.965	5.935	7.835	0.0115043	1
Midn	7.86	6.83	0.49	0.0115465	1
Cops9	7.301	8.367	2.093	0.0115522	1
Nip7	4.994	5.611	1.533	0.0116062	1
Arhgef6	7.14	5.867	0.414	0.0116251	1
Cpox	8.239	10.311	4.205	0.0117085	1
Chmp4b	8.136	8.07	0.956	0.0117483	1
Kifc1	3.222	1.924	0.407	0.0117729	1
Hmgn3	6.481	7.177	1.62	0.0118002	1
H2az2	8.403	7.977	0.744	0.0119144	1
Klhl42	3.029	2.063	0.512	0.0119833	1
Stx6	4.971	5.893	1.894	0.012013	1
Rcor2	4.759	1.93	0.141	0.0120429	1
Hnrnpm	9.184	8.58	0.658	0.012093	1
Slfn5	3.172	1.32	0.277	0.0122008	1
Clint1	7.577	6.252	0.399	0.0122402	1
Tfe3	4.576	5.292	1.642	0.0123622	1
H2-Ob	8.63	7.427	0.435	0.0124536	1
Arhgap4	5.63	3.672	0.257	0.0124849	1
Stard10	4.891	3.773	0.461	0.0124992	1
Nudt3	6.753	6.977	1.168	0.0125521	1
Tspan31	4.384	5.47	2.123	0.0126061	1
Ndfip1	6.42	7.265	1.796	0.0128335	1
Zfp703	5.535	4.088	0.367	0.0128352	1
Ndufa5	6.109	7.229	2.174	0.01296	1
Mideas	5.558	3.997	0.339	0.0134307	1
Dyrk1b	4.714	3.267	0.367	0.0134966	1
Pagr1a	5.922	5.425	0.709	0.0135929	1
Rab40c	4.678	5.269	1.507	0.0137303	1
Mindy2	7.9	7.245	0.635	0.0137541	1
Pde1b	4.845	5.609	1.698	0.0138892	1
Atad1	7.386	6.474	0.532	0.0140007	1
Lsp1	6.929	7.068	1.101	0.0141255	1
Naca	7.592	8.893	2.465	0.0141262	1
Gm53222	1.975	4.16	4.547	0.0141692	1
Dgkd	8.153	7.336	0.568	0.0142153	1
Bub3	7.955	7.325	0.646	0.0142461	1
Chmp2a	5.158	6.634	2.782	0.0142638	1
Rasgrp3	7.893	6.136	0.296	0.0143585	1
Nfkb1	6.165	7.244	2.113	0.0144185	1
Acaa1a	4.395	5.525	2.189	0.0146162	1
Ppig	7.817	7.972	1.114	0.0147051	1
Parm1	6.767	4.94	0.282	0.0149247	1
Samd10	4.594	3.345	0.421	0.0150171	1
Ssh3	4.663	2.638	0.246	0.0150673	1
Rps23	8.738	10.435	3.242	0.0151476	1
Tceal9	8.446	7.136	0.403	0.015468	1
Fis1	7.502	7.369	0.912	0.0155094	1
Tnfaip8	6.989	5.966	0.492	0.0155682	1
Lsm8	5.565	6.001	1.353	0.0156383	1
Arid3b	7.014	6.255	0.591	0.0158472	1
Atox1	5.531	6.28	1.681	0.0158534	1
Tacc3	6.011	4.616	0.38	0.0158841	1
Clcn7	4.918	5.205	1.22	0.0159352	1
Ppia	6.3	7.491	2.284	0.0160043	1
Rpl41	9.523	10.225	1.627	0.0160485	1
Mki67	7.465	5.518	0.259	0.0161299	1
3110021A11Rik	1.091	2.145	2.075	0.01614	1
Ehmt2	6.636	6.053	0.668	0.0162808	1
Polr3d	4.552	5.847	2.454	0.0164898	1
Iglc1	9.075	7.825	0.421	0.0166258	1
Cox17	6.696	7.598	1.869	0.0166991	1
AU040320	6.172	5.827	0.787	0.0168787	1
Csk	8.253	7.619	0.644	0.0169058	1
Dgke	4.387	3.749	0.642	0.01694	1
Ralgps2	7.5	5.731	0.293	0.0169842	1
Foxo1	8.682	7.888	0.577	0.0169853	1
H4c4	3.236	1.438	0.288	0.0171219	1
Stk11ip	4.551	2.998	0.341	0.0171282	1
Selenoh	6.58	5.911	0.629	0.0171886	1
St8sia4	6.293	5.544	0.595	0.017352	1
Akna	6.679	5.566	0.462	0.0173759	1
Aldh7a1	2.705	4.31	3.043	0.0174212	1
Ctsa	7.436	7.812	1.298	0.0174711	1
Grn	8.359	9.058	1.623	0.0175878	1
Exosc3	3.8	4.418	1.534	0.0176211	1
Scand1	6.707	5.899	0.571	0.0176536	1
Zhx2	4.652	3.452	0.435	0.017666	1
Mreg	8.648	9.194	1.46	0.0176733	1
Foxp4	6.225	6.646	1.338	0.0176945	1
Sh3rf1	4.524	5.742	2.327	0.0177067	1
Pabpn1	7.883	8.488	1.521	0.017755	1
Mfhas1	5.612	6.615	2.003	0.0178195	1
Rpl22l1	8.689	7.595	0.469	0.0179471	1
Tmem170b	2.37	3.638	2.407	0.0181287	1
Gm54195	1.955	2.607	1.572	0.0182546	1
Esco2	3.542	1.569	0.255	0.0183	1
Pfdn5	7.741	8.456	1.641	0.0183029	1
Pdcd2	4.027	5.299	2.415	0.0183395	1
E330033B04Rik	5.109	3.563	0.342	0.0183593	1
Creb3	4.904	6.413	2.847	0.0184023	1
Psmc2	6.502	6.883	1.302	0.0184279	1
Ckmt2	1.324	2.494	2.25	0.0184523	1
Tubb2b	7.947	6.027	0.264	0.0184605	1
Inppl1	6.631	4.568	0.239	0.0185561	1
Tusc2	4.966	5.669	1.629	0.0186134	1
Fscn1	3.039	3.928	1.852	0.0186666	1
Hip1r	6.237	4.312	0.263	0.0189088	1
Pif1	4.125	1.285	0.14	0.0189366	1
Rsrp1	8.003	8.38	1.298	0.0190835	1
Bcl2l1	5.098	6.48	2.606	0.0191105	1
Uhmk1	6.009	7.134	2.181	0.019492	1
D6Wsu163e	5.155	4.367	0.579	0.019516	1
Rhoa	8.941	8.214	0.604	0.0196206	1
Rnf122	6.36	4.658	0.307	0.0196218	1
Map1lc3b	6.943	7.509	1.481	0.0197065	1
Ufsp1	3.169	4.139	1.959	0.0197308	1
Gm23547	2.482	3.987	2.838	0.019816	1
Mtf2	6.949	6.508	0.736	0.0198849	1
Slc48a1	6.589	7.14	1.465	0.0199438	1
G6pc3	4.671	5.825	2.225	0.0200006	1
Pex11a	3.425	1.895	0.346	0.0200711	1
Clcn5	5.559	6.637	2.111	0.0201183	1
Actr3b	4.314	2.686	0.324	0.0201188	1
Mknk2	7.673	7.11	0.677	0.0201208	1
Ube2c	7.274	5.556	0.304	0.0202246	1
Dennd1a	4.584	3.974	0.655	0.0203258	1
Ly6d	9.651	7.967	0.311	0.0203495	1
Abi3	6.052	4.976	0.474	0.0203667	1
Dapp1	4.671	5.15	1.394	0.0204575	1
Gdpgp1	3.164	1.039	0.229	0.0204764	1
Top2b	8.125	7.529	0.662	0.0205538	1
Abhd17c	5.848	4.95	0.537	0.0206248	1
Klhdc2	9.341	8.738	0.659	0.0206663	1
Hypk	6.759	7.62	1.816	0.0207684	1
Tmed7	5.535	5.421	0.924	0.0208099	1
Ghitm	8.243	8.722	1.393	0.0209371	1
Thap2	3.722	4.761	2.054	0.0210516	1
Cdk5rap3	4.641	5.406	1.699	0.0210536	1
Akap8	5.654	6.086	1.349	0.021085	1
Atxn2	5.802	4.912	0.54	0.0211394	1
Atg2a	5.878	6.448	1.485	0.0212205	1
Lgals3bp	3.905	2.051	0.277	0.0212778	1
Hnrnpul1	9.185	7.945	0.423	0.021351	1
Gm10224	5.057	4.069	0.504	0.0213955	1
Anp32a	6.74	5.74	0.5	0.0215707	1
1110038B12Rik	5.932	5.433	0.707	0.0215708	1
Cpsf2	6.954	6.749	0.868	0.0216086	1
Icam2	5.516	3.747	0.293	0.0216425	1
Ndufs7	5.619	6.333	1.64	0.0216683	1
Gm4610	6.719	5.55	0.445	0.0216903	1
Fzd5	2.511	1.466	0.485	0.0217787	1
B4galnt1	7.313	6.387	0.526	0.0218767	1
Pebp1	6.041	7.152	2.159	0.0219688	1
Pelo	4.963	5.844	1.842	0.0219812	1
Dpysl2	5.671	5.067	0.658	0.0220154	1
Rasgrp2	6.228	4.876	0.392	0.0220865	1
Anp32b	8.594	7.613	0.506	0.0220874	1
Elovl1	6.087	6.741	1.573	0.0221567	1
Bcl10	6.743	6.321	0.746	0.0221904	1
Gm32819	6.442	7.133	1.614	0.0222028	1
Psmg4	4.781	5.938	2.23	0.022295	1
Srpk3	5.393	3.774	0.326	0.0223377	1
Sypl	7.016	6.589	0.744	0.0223539	1
Mvp	4.39	5.119	1.657	0.0224068	1
Ints15	5.606	5.302	0.81	0.0224642	1
Ube2j1	7.57	6.573	0.501	0.0225646	1
Mrpl36	5.433	5.888	1.371	0.022769	1
Tecpr1	6.02	5.176	0.557	0.023176	1
Smarca2	8.112	6.944	0.445	0.0232593	1
Relt	4.084	3.37	0.61	0.0232852	1
Ddit4	7.792	6.845	0.519	0.0233062	1
Grap	7.964	8.872	1.876	0.0233278	1
Kat2b	4.989	4.262	0.604	0.023421	1
Zmynd8	7.694	7.183	0.701	0.0235544	1
Fahd2a	2.25	3.871	3.075	0.023564	1
Bcat1	4.266	5.243	1.97	0.0236165	1
Tdrd7	2.078	4.085	4.019	0.0236186	1
Rps13	10.847	11.135	1.22	0.0237043	1
Klf6	5.913	6.594	1.602	0.0239262	1
Pcnt	7.07	6.512	0.68	0.0239542	1
Zdhhc18	6.249	5.453	0.576	0.0240404	1
Ccdc50	7.913	7.358	0.681	0.0241438	1
Ttn	5.386	4.116	0.415	0.0242096	1
Manea	6.544	5.467	0.474	0.0242227	1
Uqcrq	8.375	8.566	1.142	0.0242497	1
Cnbp	7.378	7.902	1.438	0.0243378	1
Fbxo4	5.333	5.954	1.538	0.024396	1
Fbxl12	6.28	5.166	0.462	0.0244429	1
Ugcg	4.738	6.103	2.575	0.0244799	1
Chpf	5.576	4.525	0.483	0.024548	1
Rpl35a	6.666	8.082	2.669	0.0245867	1
Rassf2	7.566	6.864	0.615	0.0246335	1
Sesn3	4.511	4.123	0.764	0.0246963	1
Pfdn1	6.63	5.968	0.632	0.0247877	1
Ccl22	3.396	6.259	7.275	0.0248174	1
Atl2	5.484	4.397	0.471	0.0249866	1
Csrp2	4.675	1.579	0.117	0.0250538	1
Tuba1b	8.752	9.106	1.278	0.0250583	1
Fam120c	2.908	4.478	2.969	0.0250925	1
Zfp637	3.937	1.7	0.212	0.0251467	1
Ulk2	3.469	5.046	2.983	0.0251715	1
Lgals9	5.8	4.365	0.37	0.0252164	1
Rnase6	6.694	5.456	0.424	0.0252299	1
Fam83d	2.73	2.207	0.696	0.0253582	1
Itprip	4.223	3.147	0.474	0.0253917	1
Rp9	7.105	7.398	1.225	0.025504	1
Endou	6.334	4.429	0.267	0.025517	1
Asf1a	5.188	4.842	0.787	0.0255423	1
Endod1	3.108	1.933	0.443	0.0255432	1
Arf1	7.416	8.472	2.079	0.0255523	1
Impa2	3.656	2.601	0.481	0.0256559	1
Trim34a	4.512	2.611	0.268	0.0258886	1
Smarcc2	7.048	5.818	0.426	0.0260304	1
Orc2	4.735	5.41	1.597	0.0260548	1
Chd9	5.742	6.614	1.831	0.0262766	1
Nop14	6.166	6.758	1.507	0.0263522	1
Pctp	3.416	1.842	0.336	0.0264045	1
Zfp281	5.821	4.976	0.557	0.026418	1
Rcsd1	6.308	5.434	0.546	0.0264691	1
Erlin1	2.805	4.049	2.369	0.0265848	1
Gm6637	4.13	1.129	0.125	0.0266092	1
Phf2	6.604	5.817	0.579	0.0267439	1
Txnip	7.63	6.898	0.602	0.0267467	1
Tagap	5.934	8.226	4.9	0.0267817	1
Ccr7	6.887	7.448	1.475	0.0268313	1
Akap12	6.644	2.797	0.069	0.0268686	1
Phospho2	3.742	4.883	2.205	0.0269625	1
Sgsh	4.644	3.084	0.339	0.0269662	1
Sf3b6	6.734	7.469	1.665	0.0270222	1
Cdc42se1	6.537	7.078	1.455	0.0270977	1
Sod1	8.673	10	2.509	0.0271736	1
Pdcd1lg2	3.846	1.617	0.213	0.027271	1
Lcp1	8.898	7.754	0.453	0.0274169	1
Rps11	8.005	9.48	2.779	0.0274628	1
Txnrd1	5.642	5.85	1.155	0.0276497	1
Patz1	4.684	3.707	0.508	0.0277793	1
Tacc2	3.193	5.384	4.566	0.0279373	1
Tmem256	7.88	7.092	0.579	0.0280139	1
Tmem131l	6.745	5.657	0.47	0.0281037	1
Fbxl19	4.129	3.153	0.508	0.0281861	1
Arhgap9	5.798	3.852	0.259	0.0282055	1
Usp48	6.821	7.827	2.009	0.0282108	1
Gm51671	1.051	3.478	5.381	0.0282442	1
Derl1	6.886	7.54	1.574	0.0282445	1
Sec63	6.745	7.12	1.297	0.0282626	1
Klf13	8.329	6.437	0.27	0.0282998	1
Cytip	7.048	5.077	0.255	0.0284295	1
Pqbp1	7.568	6.944	0.649	0.0285527	1
Arhgef1	8.452	7.759	0.619	0.0287711	1
Eef1d	7.074	7.928	1.807	0.0287716	1
Rhbdd2	3.706	4.824	2.17	0.028806	1
Tfeb	5.834	4.533	0.406	0.0288149	1
D8Ertd738e	6.552	6.929	1.299	0.028849	1
Selenow	6.291	7.384	2.134	0.0288785	1
Grhl1	2.852	4.185	2.52	0.0288938	1
Tprgl	6.15	7.11	1.945	0.0289321	1
Rftn1	7.73	8.709	1.97	0.0289445	1
Rpl17	9.596	10.584	1.983	0.029021	1
Baiap2	2.845	4.202	2.561	0.0290903	1
Usf2	8.733	7.836	0.537	0.0290956	1
Farsb	7.719	7.3	0.748	0.029103	1
Sh2b2	3.344	2.006	0.396	0.0291036	1
Phxr4	3.077	2.097	0.507	0.0292769	1
Ndfip2	4.994	5.44	1.362	0.0292778	1
Dnajc19	2.925	4.4	2.781	0.0292812	1
Pde7a	6.016	5.18	0.56	0.0292963	1
Cd1d1	4.051	2.472	0.335	0.0295121	1
Sh3bgrl	5.501	4.788	0.61	0.0297384	1
Knl1	5.61	3.58	0.245	0.0298241	1
Ngp	1.008	1.593	1.5	0.0299151	1
Stk26	4.95	4.218	0.602	0.0300623	1
Gvin3	5.608	4.207	0.379	0.0301287	1
Lax1	5.623	2.319	0.101	0.0301434	1
Fau	9.909	10.801	1.856	0.0304099	1
Plekhf2	5.644	6.161	1.431	0.0304178	1
Leng8	4.353	5.584	2.347	0.030424	1
Pten	7.84	6.922	0.529	0.0304533	1
Tm9sf4	5.709	6.573	1.82	0.0305104	1
Arpc2	9.542	9.34	0.869	0.0307186	1
Uvrag	7.123	6.363	0.591	0.0309774	1
E2f2	8.113	5.8	0.201	0.0309791	1
Mrps15	5.585	6.659	2.106	0.0309841	1
Ddx18	5.579	6.51	1.907	0.0310191	1
Itpr3	5.489	2.817	0.157	0.0310203	1
Fgfr1op2	6.362	6.715	1.277	0.0310767	1
Trp53inp1	7.371	6.159	0.432	0.0310832	1
Eprs	8.432	9.431	1.998	0.0312231	1
Ankrd33b	4.258	5.599	2.533	0.0312883	1
Ddx19a	4.998	3.925	0.475	0.0313718	1
Gm36738	1.033	3.755	6.598	0.031377	1
Wbp4	5.986	6.797	1.756	0.031524	1
Snx30	7.107	6.667	0.737	0.0316217	1
Cxcr5	5.107	6.186	2.113	0.0316275	1
Lockd	6.267	4.505	0.295	0.0316467	1
Gm41410	1.35	2.677	2.509	0.0317154	1
Cdk7	3.988	5.099	2.16	0.031744	1
Rps15	10.764	10.138	0.648	0.031829	1
Sh3bgrl3	9.523	9.9	1.298	0.0318334	1
Cst7	6.832	8.725	3.712	0.0318723	1
Ei24	4.323	6.018	3.239	0.0319184	1
Nup210	6.946	5.562	0.383	0.031928	1
Hsd17b11	5.361	4.818	0.687	0.0319369	1
Socs3	4.865	5.438	1.487	0.0320482	1
Mdm2	6.524	7.141	1.534	0.0321464	1
Kansl3	4.843	5.785	1.921	0.0321707	1
Mbnl1	8.78	7.651	0.457	0.0321758	1
Edf1	7.378	8.184	1.749	0.0321818	1
Inpp1	4.867	4.709	0.896	0.0322197	1
Kif16b	3.066	2.558	0.704	0.0324607	1
Cog8	4.533	2.861	0.314	0.0324681	1
Gm16973	3.577	2.884	0.618	0.032487	1
Kif15	6.308	4.652	0.317	0.0325514	1
Aebp2	6.684	7.865	2.267	0.0326095	1
Atp5j	5.434	6.549	2.166	0.0326222	1
Phyhd1	3.738	5.313	2.98	0.0326917	1
Fndc10	2.876	4.232	2.56	0.0326921	1
Siae	4.477	1.923	0.17	0.0326931	1
Adgrg1	5.329	2.873	0.182	0.0328258	1
Dennd5b	6.14	4.56	0.334	0.0329778	1
Atp2a3	6.225	4.952	0.414	0.0331676	1
Epn1	7.763	6.87	0.538	0.0331963	1
Txndc16	6.013	3.98	0.244	0.0332483	1
Birc5	7.479	5.844	0.322	0.0333111	1
Pdrg1	5.975	6.888	1.882	0.0334499	1
Dync1h1	7.959	8.254	1.226	0.0334917	1
Ufsp2	5.592	5.305	0.82	0.0336878	1
Ciao1	4.059	4.993	1.91	0.0337325	1
Fcmr	8.084	6.662	0.373	0.0338548	1
Fech	3.646	2.576	0.476	0.0338815	1
Mcm2	6.729	5.505	0.428	0.033886	1
Rps2	10.021	10.489	1.384	0.0340461	1
4930526I15Rik	3.478	4.466	1.984	0.0341973	1
Cnih1	6.079	5.77	0.807	0.0342821	1
Dnm1l	5.319	5.782	1.379	0.0343485	1
Tmed9	7.499	8.365	1.822	0.03461	1
Brd8	6.423	7.366	1.921	0.0346196	1
Cmss1	3.466	2.591	0.545	0.0346982	1
Ggcx	1.338	3.62	4.863	0.0347099	1
Rpl9	9.983	10.676	1.617	0.0347123	1
Uqcr10	7.003	7.635	1.55	0.0348088	1
Ipp	2.635	3.526	1.855	0.034815	1
Pim2	6.861	7.464	1.519	0.0348575	1
Traf1	6.041	8.518	5.565	0.0349173	1
Gnb2	7.57	6.381	0.439	0.0350895	1
Glmn	3.551	4.001	1.366	0.035213	1
Wdr73	3.837	4.353	1.43	0.0352146	1
Selenop	5.759	3.178	0.167	0.0354671	1
Fam118a	4.102	3.689	0.751	0.0355369	1
Ube2g2	5.79	6.134	1.269	0.0355821	1
Git1	6.007	5.389	0.651	0.0359594	1
Btk	5.853	5.248	0.658	0.0360092	1
Gpr107	5.355	6.368	2.018	0.0361062	1
Gstt3	3.485	5.383	3.727	0.0361215	1
Sgo1	5.425	4.206	0.429	0.0361871	1
Ehd1	6.113	7.827	3.281	0.0362871	1
Emc3	5.871	6.435	1.479	0.0363539	1
Psma4	5.703	6.798	2.136	0.0363567	1
Ptk2	2.88	4.331	2.734	0.0364042	1
Ddx54	7.257	6.654	0.659	0.036485	1
Marf1	6.798	6.015	0.581	0.0367575	1
Hexim2	4.103	3.098	0.498	0.036843	1
Eif3i	8.117	8.934	1.762	0.0369349	1
Igkc	9.793	10.595	1.744	0.0369461	1
Uty	4.463	2.892	0.337	0.0370126	1
Pwwp3a	6.144	5	0.453	0.0370481	1
Ercc6l2	5.724	7.008	2.436	0.0371361	1
Pdap1	7.823	7.201	0.65	0.0373636	1
Ndufa2	7.831	8.382	1.466	0.0374754	1
Myd88	5.351	4.899	0.731	0.0375341	1
G2e3	5.405	3.691	0.305	0.0375556	1
Tpm4	7.938	6.755	0.441	0.0375775	1
Pou2f2	7.202	6.715	0.713	0.0376777	1
Chchd2	9.095	9.423	1.255	0.0376995	1
Vps4a	4.877	5.391	1.428	0.0377287	1
Fyn	8.37	7.715	0.635	0.0378661	1
Fam120a	8.436	8.031	0.755	0.0379401	1
2810013P06Rik	4.448	3.774	0.627	0.0379584	1
Agk	3.544	1.018	0.174	0.0380878	1
St3gal5	3.938	1.936	0.25	0.038121	1
Sertad2	5.251	6.278	2.037	0.0381265	1
Polk	4.334	4.995	1.581	0.0381703	1
Ezr	8.273	7.515	0.591	0.0382097	1
Serp1	8.754	8.381	0.772	0.038219	1
Ranbp3	5.966	5.299	0.63	0.0382502	1
Cdkn2aipnl	6.559	5.604	0.516	0.0382692	1
Bap1	4.43	5.312	1.842	0.0383017	1
Rnd2	2.214	1.809	0.755	0.0383074	1
Ftl1	9.358	10.197	1.789	0.0383294	1
Sec61b	7.192	8.034	1.792	0.0383556	1
Arl5c	7.983	5.42	0.169	0.0383729	1
Cd37	8.824	9.128	1.234	0.0384787	1
Pbk	5.264	2.471	0.144	0.0385524	1
Tfdp1	5.604	4.359	0.422	0.0387103	1
Ndst1	6.45	4.858	0.332	0.0387968	1
Rpl26	10.361	11.164	1.745	0.0389086	1
Rpl13a	10.969	12.503	2.895	0.0389543	1
Czib	4.057	4.682	1.542	0.0390144	1
Gosr2	4.266	5.258	1.99	0.0390355	1
Ppp2r5d	3.95	5.395	2.723	0.0390703	1
Gpr183	6.006	7.367	2.569	0.0392767	1
Akap13	7.675	6.465	0.432	0.0393133	1
Snx13	3.967	3.233	0.601	0.0393546	1
Myb	7.283	5.941	0.394	0.0393615	1
Naip2	3.14	1.493	0.319	0.039475	1
Wars2	2.717	3.919	2.302	0.0395046	1
Dusp10	6.128	5.548	0.669	0.0395314	1
Eif5a2	2.789	3.261	1.387	0.0395337	1
2700038G22Rik	4.107	2.55	0.34	0.0395788	1
Sephs2	5.714	4.656	0.48	0.0395792	1
Laptm4a	7.403	8.676	2.417	0.0396055	1
Sp1	6.952	6.63	0.8	0.0396222	1
Atg7	4.954	4.317	0.643	0.0396408	1
Rbms2	5.694	4.765	0.526	0.0397995	1
Brca2	4.715	3.751	0.513	0.039853	1
Sulf2	1.806	3.298	2.813	0.039905	1
H2aj	6.416	7.161	1.676	0.0399538	1
Rnaset2b	6.524	6.143	0.768	0.0400112	1
Snrpe	7.327	7.695	1.291	0.0400927	1
Tnfrsf8	2.928	5.586	6.311	0.0401622	1
Blmh	7.675	7.146	0.693	0.0402583	1
Slc25a17	4.804	5.687	1.845	0.0403416	1
Rps18	10.062	11.218	2.229	0.040422	1
Pik3ip1	6.17	3.751	0.187	0.040483	1
Emc8	5.687	6.095	1.326	0.0405205	1
Ly75	7.891	8.859	1.956	0.0405709	1
Eci1	3.168	5.71	5.825	0.0406336	1
Vps13c	4.155	5.266	2.159	0.0408167	1
Rpl17-ps8	3.038	2.748	0.818	0.0408363	1
Slu7	6.679	7.171	1.406	0.040909	1
Dusp6	5.392	3.402	0.252	0.0409371	1
Hdac5	5.926	4.794	0.456	0.040944	1
Tab3	3.202	1.966	0.425	0.0409663	1
Ms4a1	9.25	8.926	0.799	0.0410211	1
Psen2	6.605	7.173	1.483	0.0411016	1
Nradd	3.959	1.826	0.228	0.0413055	1
Ppm1m	6.066	5.692	0.771	0.0414886	1
Il17ra	5.538	6.594	2.078	0.0415425	1
S1pr1	6.622	5.121	0.353	0.0415528	1
Gypc	2.244	4.196	3.868	0.0415757	1
Polr2k	1.452	4.086	6.209	0.0416591	1
Tlnrd1	6.146	4.861	0.41	0.041762	1
Osgep	5.241	5.531	1.223	0.0418208	1
Ndufs1	5.143	5.68	1.451	0.0418476	1
Gabra1	2.317	3.821	2.836	0.0419461	1
Uqcc3	5.339	6.335	1.994	0.0420347	1
Lyl1	6.77	5.732	0.487	0.0421229	1
Tomm20	3.282	4.513	2.348	0.0422178	1
Agbl5	3.375	1.78	0.331	0.0422504	1
Ssrp1	9.113	8.353	0.59	0.0422776	1
Cbx4	7.156	5.56	0.331	0.0423777	1
Icam1	5.793	6.514	1.649	0.0424859	1
Plgrkt	6.614	5.593	0.493	0.0424951	1
Ddx28	3.363	4.428	2.093	0.0425235	1
Trib1	5.193	4.593	0.66	0.0425627	1
Ldlrap1	6.297	5.208	0.47	0.0427371	1
Lasp1	7.408	7.191	0.86	0.042816	1
Copa	7.715	8.26	1.459	0.0429422	1
Snn	7.734	9.026	2.449	0.0429666	1
Ablim1	8.164	7.768	0.76	0.0430288	1
Cd164	6.582	7.426	1.794	0.0430436	1
Gm46624	1.636	4.14	5.673	0.0431024	1
Tnrc18	5.812	5.306	0.704	0.0431468	1
Tapbpl	5.259	6.272	2.018	0.0432004	1
Pdpk1	7.063	6.765	0.813	0.0432331	1
Lsm14a	6.203	6.678	1.39	0.0432684	1
Thap11	3.947	4.984	2.052	0.0433024	1
Ndufs5	1.169	2.734	2.959	0.0433319	1
Brip1	5.745	4.879	0.548	0.0433419	1
Cd44	7.708	8.996	2.443	0.0434085	1
Mfsd10	6.709	5.24	0.361	0.0434295	1
Polr1a	5.017	5.819	1.744	0.0434355	1
Epsti1	5.084	3.949	0.455	0.0435157	1
Cacna1d	3.771	1.485	0.205	0.0435208	1
Rrp9	4.72	5.432	1.638	0.0435373	1
Siglecg	6.271	6.09	0.882	0.0436109	1
Pick1	6.609	4.721	0.27	0.0437119	1
Garre1	3.655	4.276	1.538	0.0438334	1
Oaz2	5.204	5.673	1.384	0.043872	1
Tnfrsf13b	7.254	7.897	1.562	0.0440984	1
Fam216a	3.344	2.986	0.78	0.0441535	1
Ctsc	6.752	6.224	0.693	0.04418	1
Tspoap1	3.469	4.379	1.879	0.0442612	1
Gem	4.896	4.41	0.714	0.0442968	1
Dcbld2	2.214	3.663	2.73	0.0443029	1
Zfp143	4.372	3.482	0.539	0.0443378	1
Mtdh	10.56	11.104	1.458	0.0444093	1
Noc2l	5.975	6.539	1.479	0.0444908	1
Oip5	3.985	2.378	0.328	0.0445162	1
Per1	5.707	4.183	0.348	0.0445374	1
Zbtb7b	4.702	5.029	1.255	0.0446786	1
Acp5	2.938	1.052	0.27	0.0446988	1
Ap2m1	5.378	6.11	1.661	0.044748	1
Niban1	5.409	6.333	1.898	0.0447574	1
Dusp3	4.705	4.012	0.618	0.0447728	1
Pde7b	3.013	1.765	0.421	0.0448322	1
Eif4enif1	5.985	5.636	0.785	0.0448782	1
Ints3	5.376	4.827	0.683	0.044973	1
Hexa	7.476	6.743	0.601	0.0451156	1
Arhgdib	9.074	8.846	0.854	0.0451732	1
Fam185a	2.687	3.429	1.672	0.0451958	1
Gstm1	6.103	3.365	0.15	0.0453394	1
Lats1	3.109	4.036	1.901	0.045344	1
Fxyd5	4.954	5.972	2.024	0.0453484	1
Uchl3	6.347	5.432	0.53	0.0454601	1
Fam219a	2.878	2.437	0.737	0.045462	1
B4galt5	3.98	5.755	3.422	0.0455522	1
Yars2	3.241	3.644	1.322	0.0458181	1
Wdr5b	2.825	3.919	2.135	0.0458589	1
Lcmt1	4.443	4.8	1.28	0.0458777	1
Chchd7	3.45	5.217	3.404	0.0459393	1
Zbtb45	3.237	1.865	0.386	0.046011	1
Ccdc71	6.052	4.923	0.457	0.0460687	1
Lztr1	4.772	5.362	1.506	0.0461694	1
Coa7	4.405	3.975	0.742	0.0462353	1
Kif14	5.503	4.024	0.359	0.0462869	1
Ppfia4	1.813	1.058	0.593	0.0465225	1
Dhrs1	6.076	5.258	0.567	0.0466545	1
Atg10	2.378	3.468	2.128	0.0468506	1
Atrnl1	1.339	3.489	4.44	0.0468991	1
Nfil3	6.174	7.839	3.173	0.0469759	1
Hmces	4.514	1.218	0.102	0.0470665	1
Ifi47	5.34	3.622	0.304	0.047097	1
Kpna3	6.144	5.795	0.785	0.0472014	1
Adap1	5.581	5.023	0.679	0.0473218	1
Gstt2	7.741	8.918	2.261	0.0473675	1
Rpl7a	9.567	10.161	1.509	0.0473727	1
Aen	2.826	3.937	2.16	0.0474273	1
Sap30l	4.427	5.762	2.523	0.0474522	1
Rbm17	7.278	7.736	1.374	0.0476375	1
Osbpl2	4.005	4.525	1.434	0.0476472	1
Usp2	6.341	5.62	0.607	0.0479641	1
Plxnb2	5.042	4.076	0.512	0.0479694	1
Znhit1	4.162	5.291	2.186	0.0480063	1
Cdca8	7.314	5.126	0.219	0.0481264	1
Fbxo3	6.123	5.535	0.665	0.0481509	1
Prkaca	6.66	5.938	0.606	0.0482057	1
Dbp	4.984	4.105	0.544	0.0482727	1
Dym	3.494	4.577	2.119	0.0482828	1
Edc4	4.793	5.449	1.576	0.0482851	1
Tlcd2	3.087	1.767	0.401	0.0485373	1
Tcf3	7.466	6.724	0.598	0.048557	1
Abraxas2	5.431	5.814	1.303	0.0486955	1
Gm32092	3.174	4.619	2.723	0.048734	1
Clasp1	5.299	5.84	1.455	0.048762	1
Timm23	4.701	4.102	0.66	0.0488328	1
Ccdc14	3.782	2.645	0.455	0.0488575	1
Cnpy4	5.35	3.957	0.381	0.0490026	1
Pou2af1	11.418	11.21	0.866	0.0490422	1
Cyba	9.251	10.022	1.706	0.049043	1
S1pr4	6.392	5.547	0.557	0.0490916	1
Ssh2	6.959	6.424	0.69	0.0492636	1
Dhx38	5.888	5.389	0.707	0.0494228	1
Pdgfa	4.432	5.218	1.725	0.0495044	1
Cnp	6.716	6.015	0.615	0.0497477	1
Mybbp1a	6.428	7.523	2.136	0.0498026	1
LOC115488671	1.546	2.924	2.6	0.0498935	1
Tyw5	3.148	2.303	0.557	0.050021	1
Usp8	5.772	6.765	1.991	0.0502235	1
Bysl	4.902	5.312	1.329	0.0502471	1
Surf6	3.909	4.999	2.129	0.0503181	1
Cox7c	8.109	8.643	1.448	0.0503248	1
Cxcr4	7.284	6.642	0.641	0.0503835	1
Trim30a	6.669	5.661	0.497	0.0504642	1
Uhrf1	6.073	4.74	0.397	0.0505211	1
Mpv17l2	6.347	6.939	1.508	0.0505337	1
Cd83	9.252	10.058	1.748	0.0505415	1
Miip	5.179	4.507	0.628	0.0505679	1
AI504432	5.563	5.032	0.692	0.0506646	1
Zfp580	3.65	1.67	0.253	0.0507823	1
Mogs	5.698	4.842	0.553	0.0508101	1
Rab2a	5.949	6.512	1.478	0.0508999	1
Ndufb3	6.671	7.697	2.037	0.0509574	1
Umad1	2.948	3.559	1.527	0.0509615	1
Bdh1	5.78	4.449	0.398	0.0510178	1
Ddx1	6.017	6.22	1.151	0.0510362	1
Stx2	3.954	3.219	0.601	0.0510412	1
Ino80d	6.059	5.413	0.639	0.0510716	1
Rps6kb1	6.68	6.488	0.875	0.0511402	1
Clcn3	7.421	7.797	1.298	0.0512989	1
Dgcr8	4.667	5.315	1.567	0.0514279	1
Mettl1	4.509	5.622	2.164	0.0514951	1
Rpl4	10.812	11.539	1.655	0.0514988	1
Arf6	9.308	8.744	0.676	0.0515068	1
Rnpc3	4.531	5.116	1.5	0.0515825	1
Limk2	5.762	5.329	0.741	0.0515829	1
Mef2c	10.774	10.402	0.773	0.0516491	1
Cert1	3.877	5.956	4.225	0.0517259	1
Mrpl12	6.451	7.247	1.736	0.0517327	1
Psrc1	4.697	5.514	1.762	0.0517566	1
Znhit6	4.589	5.388	1.739	0.051763	1
Epop	2.679	4.456	3.426	0.0518811	1
Anp32e	7.85	7.331	0.698	0.0519735	1
Cnpy3	6.593	7.746	2.224	0.0519839	1
Ift122	3.771	3.17	0.659	0.0520459	1
Amigo2	5.563	7.03	2.766	0.0520621	1
Igsf3	6.434	4.647	0.29	0.052294	1
Cerk	7.989	6.934	0.481	0.0523336	1
H2-Aa	12.982	12.451	0.692	0.0523467	1
H2-D1	9.36	9.779	1.337	0.0524815	1
Egfl6	3.823	1.594	0.213	0.0524951	1
Jmjd1c	6.683	5.855	0.563	0.052551	1
Slc19a1	4.76	3.959	0.574	0.0525519	1
Ring1	3.003	4.527	2.877	0.0525845	1
Daxx	6.716	6.115	0.659	0.052637	1
Jtb	5.127	6.606	2.788	0.0527429	1
Slc19a2	2.057	4.149	4.263	0.0528528	1
Kdm2a	7.821	7.409	0.752	0.0529104	1
Ubqln2	3.389	3.722	1.259	0.0529172	1
Abcf3	3.415	5.124	3.269	0.0529766	1
Kynu	4.763	6.166	2.645	0.0529846	1
Slc31a2	4.858	5.898	2.056	0.0529993	1
Calm3	8.52	8.104	0.749	0.0530239	1
Cbarp	1.216	2.743	2.883	0.0530642	1
Rpl23	10.047	11.506	2.749	0.0530716	1
Cdc42se2	7.306	6.718	0.665	0.0531382	1
Ska1	6.016	4.318	0.308	0.0531758	1
Uba7	5.622	4.613	0.497	0.0532431	1
S100a10	5.22	4.436	0.581	0.0533232	1
Scn3a	6.199	3.646	0.17	0.0534606	1
Mpp1	6.034	4.555	0.359	0.0534786	1
Slc29a1	5.284	3.56	0.303	0.0535318	1
Rassf5	6.373	5.129	0.422	0.0536039	1
Snrpg	6.871	7.554	1.605	0.0536677	1
Sirt1	4.937	4.04	0.537	0.0536688	1
Memo1	4.269	4.728	1.374	0.0537016	1
Gm41461	2.616	4.181	2.959	0.0537339	1
Zmym2	5.397	4.915	0.716	0.0537487	1
Pip5k1b	4.261	3.363	0.537	0.053763	1
Cd24a	7.809	5.239	0.168	0.0539012	1
Kcna3	6.3	5.38	0.529	0.0540004	1
Zfyve19	2.939	3.367	1.345	0.0540851	1
Dap	7.301	5.804	0.354	0.0541259	1
Dock10	7.803	8.223	1.337	0.0542061	1
Ankrd13c	4.831	5.491	1.579	0.0542686	1
Zpr1	5.536	6.739	2.302	0.054418	1
Sepsecs	3.506	4.541	2.05	0.054509	1
Trim56	6.404	5.63	0.585	0.0545205	1
Cdc42	9.349	9.114	0.85	0.0545525	1
Pot1a	4.457	3.742	0.609	0.0545634	1
Ccpg1	4.623	5.24	1.534	0.0545697	1
Ndufb9	6.661	7.481	1.765	0.0546069	1
Psma7	8.044	8.501	1.373	0.0547605	1
Rpl28	10.581	10.817	1.177	0.0548153	1
Psmf1	5.057	5.863	1.748	0.0548547	1
Rel	5.982	6.705	1.65	0.0548642	1
Snhg9	6.965	6.459	0.704	0.0548971	1
Senp7	5.469	4.384	0.471	0.0549088	1
Ccdc134	5.564	4.607	0.515	0.0550447	1
Ndufaf7	3.034	4.273	2.36	0.055089	1
Zfp36l1	8.917	8.163	0.593	0.0551186	1
LOC115487097	2.549	1.056	0.355	0.0551459	1
Dbt	3.828	4.86	2.045	0.0551527	1
Phldb3	3.194	1.448	0.298	0.0551922	1
Lactb	5.119	4.992	0.915	0.0551991	1
Wsb1	5.332	5.632	1.231	0.0552561	1
Rnf7	5.03	5.954	1.897	0.055297	1
Lmo4	7.702	6.71	0.503	0.0553177	1
Spata13	5.972	4.31	0.316	0.0554012	1
Tdp1	5.218	4.272	0.519	0.0554033	1
Tmem106c	3.413	4.133	1.647	0.05552	1
H1f5	4.534	2.629	0.267	0.0555839	1
Mcts1	5.378	6.473	2.136	0.0556082	1
Tmed5	5.935	6.611	1.597	0.055669	1
Setd3	5.173	6.013	1.791	0.0557085	1
Loxl3	1.43	2.424	1.991	0.0559736	1
Ccdc30	3.428	1.632	0.288	0.0559849	1
Fbxo6	4.779	5.099	1.248	0.0561097	1
Gne	4.395	4.016	0.769	0.0561544	1
Cs	7.111	7.917	1.749	0.0562047	1
Rab35	6.86	7.838	1.969	0.0562139	1
Creb1	6.761	6.375	0.765	0.0562815	1
Hhex	2.713	1.618	0.468	0.056302	1
Mllt11	4.237	4.58	1.268	0.0563135	1
Apmap	4.181	5.731	2.928	0.0566163	1
Pcyox1	3.316	4.215	1.865	0.0569253	1
Casp9	4.973	2.71	0.208	0.056927	1
Nelfcd	5.724	4.783	0.521	0.0569276	1
Psip1	6.794	6.258	0.69	0.0570756	1
Zfc3h1	5.784	6.848	2.091	0.0571039	1
Dcaf12	6.144	5.514	0.646	0.0572472	1
Dctn1	4.857	4.077	0.582	0.0572668	1
Mdp1	6.339	6.758	1.337	0.057366	1
Fam98b	4.937	5.421	1.398	0.057488	1
Nrgn	9.027	4.285	0.037	0.0574976	1
Aplf	3.734	1.503	0.213	0.0575443	1
Atf6b	7.372	6.947	0.745	0.0575476	1
Ewsr1	7.227	7.654	1.345	0.0576403	1
Fbxo45	3.964	4.193	1.172	0.0577294	1
Cldnd1	6.543	7.556	2.018	0.0578001	1
Mrpl24	6.095	6.872	1.713	0.0578289	1
Bhlhe41	5.609	4.616	0.502	0.0579984	1
Hspa4	7.4	7.812	1.33	0.0580383	1
Cd180	4.314	2.23	0.236	0.0580714	1
Hk2	5.737	7.119	2.607	0.0580934	1
Yeats4	7.597	6.991	0.657	0.0581097	1
Pdk2	3.228	1.461	0.294	0.0581968	1
Uap1l1	6.75	6.34	0.752	0.0582021	1
2700099C18Rik	4.025	1.918	0.232	0.0583659	1
Ankrd26	4.845	3.852	0.502	0.0583723	1
Ascc2	4.279	5.405	2.182	0.0584032	1
Dvl2	6.918	6.659	0.836	0.0585547	1
Emc4	1.239	3.436	4.584	0.0586635	1
Ccnk	5.953	7.265	2.483	0.0586846	1
Cenpv	4.329	2.677	0.318	0.0587014	1
Galt	3.936	4.38	1.361	0.058862	1
Atp5h	7.029	8.148	2.173	0.0589038	1
Suclg1	5.839	6.601	1.695	0.0589975	1
Nherf1	5.338	4.78	0.679	0.0590409	1
Fcer2a	8.08	9.355	2.421	0.0590481	1
Ppid	5.154	5.583	1.346	0.0590595	1
Thy1	4.598	6.056	2.746	0.0591124	1
Ddx39a	7.039	6.665	0.772	0.0591597	1
Tbrg1	5.942	5.843	0.933	0.0592303	1
Coq3	2.31	3.144	1.783	0.0592398	1
Tomm7	7.703	8.359	1.575	0.0592442	1
Nudt5	4.91	4.045	0.549	0.0593559	1
Gt(ROSA)26Sor	3.472	2.643	0.563	0.0593928	1
Pgm1	4.534	4.923	1.309	0.0594186	1
Cnot6l	7.241	6.588	0.636	0.0594494	1
Elf1	8.486	7.816	0.628	0.0594554	1
Kdm1a	5.418	4.609	0.571	0.0595345	1
n-TRacg1	2.392	2.195	0.872	0.0595483	1
Dusp22	4.388	3.072	0.401	0.0595903	1
Kcnb1	4.789	3.571	0.43	0.0596281	1
Krr1	3.945	4.988	2.061	0.0596373	1
Aspscr1	4.064	4.556	1.407	0.0597211	1
Ddx41	7.041	6.287	0.593	0.0598554	1
Klf16	3.943	4.965	2.031	0.05995	1
4930523C07Rik	5.801	5.288	0.701	0.059976	1
Rpl37a	10.246	10.619	1.296	0.0600136	1
H2-Eb1	12.655	12.209	0.734	0.0600522	1
Inka1	3.744	4.837	2.133	0.0604328	1
Wdfy1	5.443	6.149	1.631	0.0607119	1
Stat5a	7.009	8.421	2.662	0.060753	1
Hirip3	5.574	4.539	0.488	0.0609602	1
Aurka	4.836	2.853	0.253	0.0610152	1
Dock2	7.9	7.504	0.76	0.061075	1
Timd2	6.161	7.235	2.104	0.0610805	1
Fcrla	5.11	1.408	0.077	0.0611462	1
Cmtm7	5.938	5.218	0.607	0.0612604	1
Dctpp1	5.359	4.523	0.56	0.0613527	1
Phpt1	6.698	7.414	1.643	0.0613638	1
Nupr1	2.548	5.129	5.984	0.0613699	1
Ndufb11	6.132	6.765	1.551	0.0613777	1
Arih1	6.605	6.893	1.221	0.0614316	1
Ralgapb	4.842	5.704	1.817	0.0614632	1
Gm14230	3.977	2.448	0.347	0.0614804	1
Atp23	2.828	3.939	2.16	0.061507	1
Snora73b	3.386	2.015	0.387	0.0616457	1
Mob1a	6.059	6.691	1.549	0.061798	1
Dctn3	5.847	6.4	1.467	0.0619921	1
Bcl6	4.873	5.506	1.551	0.0619979	1
Gnai3	5.103	5.582	1.394	0.0620685	1
Man1b1	5.688	6.284	1.512	0.0621901	1
Tsc2	3.845	4.469	1.54	0.0622663	1
Riok1	6.195	6.853	1.578	0.0623487	1
H2-M5	4.845	3.148	0.308	0.0623849	1
Sp100	8.158	6.493	0.315	0.0623856	1
Ap2s1	7.097	6.195	0.535	0.0625406	1
Ran	7.844	8.417	1.487	0.0625946	1
Cep104	4.72	3.579	0.453	0.0625998	1
Pknox1	5.9	5.11	0.578	0.0626041	1
2810403D21Rik	2.564	1.23	0.397	0.062647	1
Clec2d	2.287	3.637	2.55	0.0626565	1
Ccnb1	6.333	4.009	0.2	0.0627034	1
Kdsr	4.994	6.048	2.076	0.0628662	1
Pxylp1	3.629	1.683	0.26	0.0628968	1
Gpd1l	5.945	4.715	0.426	0.0629786	1
H3f3b	8.122	8.68	1.473	0.0630953	1
Utp3	7.537	7.115	0.747	0.0631496	1
Rc3h1	5.313	4.684	0.647	0.0631599	1
Rbm25	8.814	9.216	1.322	0.0631888	1
Tatdn2	7.325	6.516	0.571	0.0632647	1
Smarca4	8.496	7.814	0.623	0.0633276	1
Slc25a23	3.65	1.996	0.318	0.0633484	1
Prim2	4.681	3.643	0.487	0.0633688	1
Stmn1	6.53	5.717	0.569	0.0634095	1
Cdr2	1.708	2.924	2.324	0.0635106	1
Gen1	4.929	3.564	0.388	0.0635816	1
Ankrd27	5.599	6.962	2.572	0.063641	1
Acap2	5.08	5.379	1.231	0.063686	1
Jak3	5.285	4.01	0.413	0.0636916	1
Rpl12	10.215	10.878	1.584	0.063745	1
Adsl	4.662	5.078	1.334	0.0638585	1
Fbrsl1	4.629	3.856	0.585	0.0638682	1
Abi1	4.896	6.228	2.518	0.063951	1
Leng1	3.658	4.671	2.018	0.0640254	1
Smdt1	6.354	6.803	1.365	0.0641978	1
Zfp780b	3.783	3.403	0.769	0.0642179	1
Cenps	5.58	3.933	0.319	0.0642684	1
Tln1	8.472	8.005	0.723	0.0642764	1
Cul4a	3.314	4.713	2.637	0.0642813	1
Atp6ap1	7.99	8.586	1.512	0.0644369	1
Rps3a1	8.113	9.536	2.682	0.0645486	1
Eif4b	7.804	7.441	0.778	0.0646981	1
Tex2	2.028	3.515	2.803	0.0647354	1
Btbd1	4.498	5.548	2.071	0.0649947	1
Fam114a2	6.622	7.211	1.504	0.0650175	1
Ube2h	6.951	5.943	0.497	0.0650775	1
Oip5os1	3.887	5.147	2.395	0.0651122	1
Trpc4ap	6.798	6.696	0.932	0.0651188	1
Dnajc11	4.899	5.327	1.345	0.0651766	1
Abhd12	5.082	5.953	1.828	0.0652259	1
Exoc3l	2.804	1.447	0.39	0.0652593	1
Yy1	6.91	7.218	1.238	0.0653449	1
Bin1	6.373	5.105	0.415	0.0653868	1
Pink1	5.444	5.671	1.17	0.0654284	1
Cops2	5.29	5.848	1.472	0.0655009	1
Calcrl	3.713	2.072	0.321	0.065582	1
Bfsp2	4.965	3.055	0.266	0.0656348	1
Prdx6	6.657	7.112	1.371	0.0657035	1
Aup1	8.104	8.304	1.148	0.0659717	1
Sgo2a	4.734	2.728	0.249	0.065982	1
Nsun2	6.827	7.794	1.956	0.0659943	1
Chm	5.89	4.563	0.399	0.0662133	1
Map4k4	8.365	6.897	0.361	0.0663032	1
Rps24	11.871	12.614	1.673	0.0663453	1
Hemk1	3.119	5.036	3.775	0.0663631	1
Pex3	4.315	3.191	0.459	0.0664463	1
Trim25	6.111	4.672	0.369	0.066518	1
Mfsd14b	3.539	4.872	2.52	0.066613	1
Akirin1	3.468	4.193	1.653	0.0666166	1
Hnrnpa0	8.82	7.965	0.553	0.0667345	1
Uba5	5.518	6.872	2.555	0.0667521	1
Rdh14	3.215	4.681	2.761	0.0669618	1
Cenpf	6.486	3.779	0.153	0.0671506	1
Gucd1	2.242	3.828	3.002	0.0671562	1
Cnot4	4.936	5.511	1.49	0.0671818	1
Ensa	4.636	5.339	1.628	0.0671982	1
Brf1	4.791	5.627	1.785	0.067289	1
Zc3h14	4.937	5.546	1.525	0.0673243	1
Ndufs3	4.539	5.458	1.89	0.067349	1
D130020L05Rik	2.118	3.682	2.958	0.0676044	1
Sms	5.705	6.246	1.456	0.0676122	1
Fbxo46	5.41	4.723	0.621	0.0677567	1
Zbtb46	4.631	5.953	2.501	0.0678726	1
Acaa2	4.857	3.473	0.383	0.067919	1
Rnf220	6.982	6.52	0.726	0.0679194	1
Glycam1	3.237	3.471	1.176	0.0680411	1
Gabarap	8.369	8.769	1.32	0.0680481	1
Calm1	9.592	10.257	1.586	0.0681117	1
Kif11	6.251	3.843	0.188	0.0681186	1
Cux1	6.437	5.901	0.69	0.0682358	1
Copb2	6.708	6.985	1.211	0.0682732	1
Zscan26	2.089	3.419	2.514	0.0683234	1
Trmt61b	3.51	2.977	0.691	0.0685139	1
Slfn2	5.769	7.088	2.495	0.0685549	1
Gm8369	7.377	5.551	0.282	0.0685769	1
Srp9	4.67	5.998	2.51	0.0685858	1
Exoc4	6.386	7.025	1.557	0.0686211	1
Tm9sf3	7.975	8.521	1.46	0.0686485	1
Rxra	2.264	4.601	5.05	0.0687156	1
Mtap	3.422	4.789	2.579	0.0687246	1
Chchd4	4.899	5.926	2.038	0.0687811	1
Gm4258	5.341	3.216	0.229	0.0688051	1
Morc2a	4.546	4.172	0.772	0.0688226	1
Smc6	7.356	6.771	0.667	0.0688803	1
Kctd2	5.066	6.112	2.064	0.0689003	1
Aldh2	8.229	6.974	0.419	0.0689011	1
Slc10a3	4.744	5.52	1.713	0.0689419	1
Ogfod2	5.732	5.632	0.933	0.0689964	1
Tapbp	9.583	8.857	0.605	0.0690193	1
Tmem176b	8.748	9.706	1.941	0.0690797	1
Chp1	5.929	6.542	1.53	0.0691068	1
Ssr3	6.859	7.444	1.5	0.0691416	1
Becn1	6.975	7.354	1.301	0.0691603	1
Adrm1	4.395	5.337	1.921	0.0692857	1
Gpank1	5.355	5.771	1.335	0.0693491	1
Gm34095	5.338	3.132	0.217	0.069512	1
Pcnp	5.265	4.134	0.456	0.0695655	1
Shprh	3.172	4.465	2.45	0.0696708	1
Rufy1	4.96	3.979	0.507	0.0697893	1
Ssbp1	3.981	5.466	2.8	0.0698073	1
Xpo6	6.011	6.574	1.477	0.069814	1
LOC118568133	3.844	1.996	0.278	0.0698542	1
Phax	5.699	5.352	0.786	0.0698945	1
Mms19	4.813	5.672	1.814	0.0699292	1
Sec61a2	3.543	5.262	3.292	0.0699674	1
Pbxip1	8.39	8.217	0.887	0.070173	1
Ift20	6.938	8.122	2.273	0.0702325	1
Anapc13	5.336	5.84	1.418	0.0702504	1
Fabp5	3.235	4.246	2.015	0.0702544	1
Rgs1	5.568	3.115	0.183	0.0703165	1
Mfsd5	6.003	6.346	1.269	0.0703213	1
Gm8995	6.249	5.067	0.441	0.0704417	1
1110004F10Rik	7.48	6.78	0.616	0.0705282	1
Nxf1	6.4	7.217	1.762	0.0707276	1
Jkamp	5.41	5.725	1.244	0.0707474	1
Zfp276	4.047	3.205	0.558	0.0707505	1
Rabgap1l	6.024	6.611	1.502	0.0707559	1
Slc38a7	4.053	5.035	1.975	0.0707991	1
Ccm2	6.502	5.206	0.407	0.07086	1
Egln2	6.279	6.766	1.401	0.0709007	1
Bltp3b	6.54	7.301	1.694	0.070908	1
Tbl1xr1	6.204	4.757	0.367	0.0709421	1
Rab30	4.79	3.793	0.501	0.07107	1
Ndufaf2	2.574	3.584	2.014	0.0710794	1
Mapkapk5	5.347	5.971	1.541	0.0711212	1
Plk3	2.454	4.218	3.395	0.0711238	1
Hccs	4.23	3.722	0.703	0.0711652	1
Ccng2	5.993	4.643	0.392	0.0712289	1
Eri3	4.137	5.194	2.081	0.0713209	1
Cebpz	6.198	6.994	1.737	0.0713802	1
Ube2d2a	8.433	8.131	0.811	0.0713942	1
Zbtb10	4.231	5.179	1.928	0.0714034	1
Zcchc8	5.727	4.732	0.502	0.0714059	1
Nipsnap2	4.267	5.185	1.89	0.0714511	1
Nsa2	6.454	7.853	2.637	0.0714927	1
Rnf213	5.33	3.852	0.359	0.0715053	1
Nsmaf	6.651	5.798	0.553	0.0718566	1
Ppp4r3b	7.471	6.862	0.656	0.071872	1
Sema4d	6.777	5.323	0.365	0.0718791	1
Stx12	3.628	4.702	2.105	0.071946	1
Pmf1	7.175	6.29	0.542	0.0720184	1
Clec2i	5.68	4.964	0.609	0.0720546	1
Ubl3	5.992	6.279	1.221	0.0721554	1
Flna	7.047	6.076	0.51	0.0721739	1
Mapkap1	5.341	5.589	1.188	0.0721939	1
Sorbs1	3.011	4.673	3.163	0.0722294	1
Pfn1	9.352	8.199	0.45	0.072241	1
Cxxc1	6.735	6.19	0.685	0.0723052	1
Rhobtb2	6.397	5.021	0.385	0.0723283	1
Nfyc	5.418	4.389	0.49	0.0725462	1
Ecpas	6.069	6.744	1.596	0.072592	1
Mettl23	4.278	5.224	1.927	0.0726191	1
Cars2	4.783	5.253	1.386	0.0726208	1
Dera	5.423	4.973	0.732	0.0726587	1
Exosc4	3.025	4.864	3.578	0.0726608	1
Comtd1	3.75	4.519	1.704	0.0726821	1
Rpl35	9.376	10.25	1.834	0.0726926	1
Ndufs6	6.494	6.971	1.393	0.0727811	1
Kin	4.658	5.108	1.366	0.0729065	1
Ptch1	3.63	5.112	2.793	0.072964	1
Gm34861	1.68	3.089	2.655	0.0729646	1
Bcl2a1b	5.818	8.74	7.575	0.0730689	1
Cchcr1	3.573	1.587	0.252	0.0730778	1
Hsp90ab1	12.313	12.78	1.382	0.073159	1
Blvrb	6.152	4.43	0.303	0.0732758	1
Utp6	4.678	5.583	1.872	0.0733809	1
Gm46660	2.071	1.528	0.686	0.0733956	1
Adh5	5.593	6.164	1.485	0.0734003	1
Uqcrc1	6.877	6.214	0.632	0.0734402	1
Bpgm	3.715	2.705	0.496	0.073458	1
Fcer1g	5.358	4.213	0.452	0.073699	1
Actr10	6.192	6.735	1.457	0.0737206	1
Pkig	7.049	6.519	0.693	0.0739149	1
Bzw2	7.312	6.694	0.652	0.0739401	1
Man2a1	5.372	3.715	0.317	0.0739439	1
Crot	3.549	4.183	1.551	0.0739618	1
Slc25a32	4.947	4.539	0.754	0.0739684	1
Ppm1l	5.178	4.413	0.588	0.0739993	1
Gns	7.681	8.151	1.384	0.0741566	1
Ankrd44	5.72	5.299	0.747	0.0742513	1
Rbm8a	8.83	8.488	0.789	0.0742699	1
Lrrfip2	4.59	5.48	1.853	0.0744714	1
Eif4h	7.26	7.363	1.074	0.0745579	1
Hs2st1	3.245	4.169	1.898	0.0746289	1
Gm15834	3.538	4.215	1.598	0.0747058	1
Tlr12	6.877	6.156	0.607	0.0747249	1
Sod2	5.182	6.34	2.232	0.0749947	1
Kat7	6.882	6.358	0.695	0.0750023	1
Hnrnpd	8.746	7.932	0.569	0.0750428	1
Pgrmc2	6.145	6.909	1.697	0.0750504	1
Hjurp	6.694	5.558	0.455	0.0751233	1
Rab3gap1	5.595	6.258	1.583	0.0751918	1
Irag2	7.601	8.55	1.931	0.0753137	1
Parn	3.998	4.863	1.822	0.0753674	1
Cdk1	7.259	5.232	0.245	0.0753796	1
Mrpl35	4.473	5.278	1.747	0.0755538	1
Zfp956	4.288	3.529	0.591	0.0756583	1
Cog4	4.253	5.344	2.13	0.0757353	1
Ppp2r1a	8.268	7.659	0.656	0.0757522	1
Mafg	6.555	7.148	1.509	0.0758795	1
Cd46	2.977	1.567	0.376	0.0759829	1
Txndc15	4.345	4.948	1.519	0.0760153	1
Ube2j2	6.657	6.246	0.752	0.0761216	1
Ccnd2	8.334	9.609	2.42	0.0761307	1
C1qa	1.273	1.924	1.571	0.0761563	1
Rpl15	5.48	7.358	3.677	0.0761883	1
Gse1	5.475	3.518	0.258	0.0761992	1
Mxd1	4.831	4.107	0.605	0.0762269	1
Map1lc3a	4.579	5.011	1.35	0.076309	1
Slc25a24	3.974	1.772	0.217	0.0763189	1
Btg1	6.935	6.018	0.53	0.07638	1
Ptprc	8.497	7.948	0.683	0.0765014	1
Mbd4	5.955	4.573	0.384	0.0767513	1
Tinf2	4.575	3.692	0.542	0.0768924	1
Tanc2	5.279	6.731	2.735	0.0769202	1
Gm5617	3.51	4.115	1.521	0.0770202	1
Anapc4	4.675	5.641	1.954	0.0771609	1
C430002N11Rik	1.959	5.603	12.503	0.0771899	1
Parp1	7.841	7.019	0.566	0.0772023	1
Hexb	4.946	5.597	1.57	0.0772165	1
Ttc32	3.675	3.02	0.635	0.0773143	1
Ddt	6.355	7.844	2.806	0.0773244	1
Trim13	1.263	2.609	2.542	0.0773787	1
Ino80e	6.469	5.729	0.599	0.0774027	1
Slc38a1	7.787	7.579	0.866	0.0774672	1
Hectd1	7.234	7.648	1.332	0.0775435	1
Cplane1	3.127	3.704	1.492	0.0775717	1
Amfr	5.845	6.455	1.526	0.0776108	1
Pisd	3.811	4.742	1.907	0.07762	1
Zfp651	4.161	3.183	0.508	0.0776266	1
Txndc5	8.527	5.651	0.136	0.0776449	1
Polr2g	6.655	6.306	0.785	0.0777108	1
Lage3	5.751	6.293	1.456	0.0777812	1
Spata2	4.824	4.035	0.579	0.0777935	1
Flvcr1	7.058	5.829	0.427	0.0779572	1
Sec11c	7.922	8.756	1.782	0.0780213	1
Itgb7	3.819	1.398	0.187	0.0780325	1
Hapstr1	4.971	6.535	2.957	0.0780884	1
Rev3l	5.454	4.407	0.484	0.0782116	1
Akt1s1	3.555	2.298	0.418	0.0782145	1
Wdr46	5.166	4.737	0.743	0.0782217	1
Gtf2f1	5.918	6.332	1.332	0.0782823	1
Dtx3l	5.89	4.778	0.463	0.0783026	1
Helz2	5.927	4.861	0.478	0.0783102	1
S100a13	5.446	6.462	2.023	0.0784268	1
Usp14	5.61	5.983	1.295	0.0784347	1
Unc93b1	9.223	9.105	0.921	0.0787289	1
Cdca7l	4.469	3.28	0.439	0.0787573	1
Stk38	7.023	6.372	0.637	0.0787891	1
Chst1	3.793	2.631	0.447	0.0788284	1
Vac14	5.674	5.059	0.653	0.0788785	1
Fancd2	4.856	3.261	0.331	0.0791919	1
Ubb	9.894	9.567	0.797	0.0793728	1
Lin7c	5.384	4.991	0.762	0.0793823	1
Appl1	6.4	7.277	1.837	0.0794029	1
Zdhhc17	1.742	3.025	2.432	0.0794732	1
Tcf25	7.812	8.354	1.456	0.0796066	1
Lmo7	7.418	3.553	0.069	0.0796385	1
Stxbp5	5.169	4.575	0.663	0.0796532	1
Arsk	2.847	1.321	0.347	0.0796539	1
Tk1	6.494	4.664	0.281	0.0797028	1
Braf	5.572	4.776	0.576	0.0797395	1
Naa40	8.106	6.036	0.238	0.0797612	1
Mpv17	5.373	6.003	1.548	0.0797697	1
Cyb561a3	6.442	6.222	0.859	0.0797731	1
Irf4	7.96	7.479	0.716	0.0798584	1
Pcnx3	6.645	5.413	0.426	0.0798834	1
Il9r	9.232	7.463	0.293	0.0799161	1
Pex12	2.013	4.259	4.744	0.0799317	1
U2af2	9.078	8.333	0.597	0.0800044	1
Dip2a	2.601	1.429	0.444	0.0800356	1
Rps7	9.5	10.605	2.152	0.0800706	1
Sap30bp	4.729	5.113	1.304	0.0802016	1
Gpr65	5.245	4.276	0.511	0.0802629	1
Rpl29	7.584	8.349	1.699	0.0802951	1
Pbrm1	8.055	7.628	0.744	0.0803072	1
Ptk2b	8.629	6.653	0.254	0.0803344	1
Rpl5	7.786	9.58	3.467	0.080416	1
Shq1	2.347	3.628	2.429	0.0804808	1
Dusp4	6.042	5.731	0.806	0.0805328	1
Dcn	2.097	2.387	1.222	0.0806682	1
Ccdc115	6.197	6.827	1.548	0.0807674	1
Usp4	6.184	6.716	1.446	0.0808509	1
Ccl5	2.064	3.426	2.57	0.0810581	1
Pank1	3.777	2.185	0.332	0.0810596	1
Mrps18a	5.499	4.866	0.645	0.081094	1
2310057M21Rik	3.772	4.186	1.332	0.0810977	1
Adgrl2	4.537	1.155	0.096	0.0811046	1
Ikzf3	7.348	6.739	0.656	0.0811072	1
Sdcbp	6.854	6.245	0.656	0.0811661	1
Chchd10	8.409	7.318	0.469	0.0811668	1
Limd2	9.589	8.57	0.493	0.0811724	1
Ppp5c	6.153	5.159	0.502	0.0811726	1
Snrnp25	8.421	7.935	0.714	0.0812989	1
Rnh1	6.194	6.852	1.578	0.0813679	1
H1f4	6.531	5.614	0.53	0.0814237	1
Numbl	3.481	1.694	0.29	0.0814513	1
Ccdc9	5.748	5.059	0.62	0.0814664	1
Usp10	4.845	5.198	1.277	0.0814906	1
Aamp	8.006	8.546	1.454	0.0814922	1
Cflar	7.251	7.927	1.598	0.0815401	1
Srp19	6.09	6.676	1.501	0.081745	1
Tm2d3	6.176	6.587	1.33	0.081776	1
2610044O15Rik8	1.813	2.33	1.431	0.0818142	1
Mfge8	6.315	5.442	0.546	0.0818298	1
Pts	3.746	4.332	1.501	0.0818521	1
Cit	6.094	4.653	0.368	0.0818544	1
Alg2	3.868	5.05	2.269	0.081856	1
Mpdu1	7.232	6.781	0.731	0.0818697	1
Eif3k	8.621	8.965	1.269	0.0818763	1
Fbxw7	6.899	7.922	2.032	0.0819525	1
Pafah1b3	6.522	4.325	0.218	0.0820737	1
Rassf4	5.69	4.154	0.345	0.0821617	1
Zfp961	3.524	4.188	1.585	0.0821659	1
Tmed3	4.676	6.21	2.895	0.0822715	1
Nabp1	4.248	6.108	3.632	0.0824554	1
Mrgpre	4.199	2.901	0.407	0.0824581	1
Hspb7	1.74	2.314	1.488	0.0824969	1
Ifngr2	4.827	6.131	2.469	0.0824984	1
Nol9	4.599	5.331	1.661	0.082518	1
Cish	5.302	8.131	7.108	0.0826101	1
Fbxl3	3.952	4.773	1.766	0.0826561	1
Cdyl2	6.431	5.049	0.384	0.0828365	1
Ric8a	4.418	6.025	3.045	0.0828731	1
Prickle3	3.174	4.275	2.146	0.082934	1
Zfp410	4.964	4.098	0.549	0.082941	1
Cc2d1b	5.719	6.327	1.524	0.0830599	1
Ezh1	4.971	5.816	1.796	0.0830972	1
Cep63	5.698	4.979	0.608	0.0831977	1
Ccnl1	7.784	6.918	0.549	0.0832601	1
Galk1	5.937	4.622	0.402	0.0832619	1
Cnot3	7.023	6.113	0.532	0.0832648	1
Rpl10	8.059	9.203	2.209	0.083285	1
Cox19	4.16	4.734	1.489	0.0833696	1
Csnk2a1	7.041	6.424	0.652	0.083376	1
Asah2	3.456	4.417	1.948	0.0833775	1
Zfp280b	5.405	6.095	1.614	0.0835128	1
Crybg3	4.378	5.141	1.696	0.0835187	1
Clic1	8.335	7.867	0.723	0.0835233	1
Pnpo	4.034	4.701	1.588	0.0836541	1
Chek1	3.852	2.562	0.409	0.0837964	1
Mrrf	3.986	4.965	1.97	0.0838721	1
Rnaseh2a	5.339	4.543	0.576	0.0838973	1
9330020H09Rik	2.44	1.193	0.421	0.0839457	1
Phc1	3.852	4.618	1.7	0.0840365	1
Ing3	5.881	4.96	0.528	0.0840597	1
Tmem237	1.445	2.721	2.422	0.0841191	1
Smap2	7.871	8.404	1.447	0.0843217	1
Pde4a	4.453	2.85	0.329	0.0843778	1
Znrf1	5.608	4.713	0.538	0.0844751	1
Isy1	5.451	4.535	0.53	0.0845463	1
6330407A03Rik	5.318	4.071	0.421	0.0845877	1
Gm34362	3.123	1.668	0.365	0.0846534	1
Icmt	5.08	4.521	0.679	0.0847772	1
Psmd7	7.626	8.043	1.335	0.0849191	1
Mllt10	6.68	6.41	0.83	0.0849848	1
Lsm12	6.266	5.447	0.567	0.0850466	1
Rps16	9.344	9.921	1.492	0.0850526	1
Aifm2	2.435	1.987	0.733	0.0850858	1
Rbm14	6.054	5.012	0.486	0.085098	1
Pigb	1.549	2.755	2.307	0.0851169	1
Bbc3	7.046	6.609	0.739	0.0851248	1
Slc66a3	4.798	3.418	0.384	0.0851401	1
Tspan3	3.658	5.166	2.845	0.085224	1
C920009B18Rik	5.712	4.451	0.417	0.0854078	1
Ascc3	2.291	4.09	3.478	0.0856025	1
Babam2	2.259	3.758	2.827	0.0856422	1
Adamts10	5.083	4.104	0.507	0.0856568	1
4933434E20Rik	5.778	6.103	1.253	0.0856627	1
Mbd3	5.837	6.033	1.146	0.0856834	1
Sec23a	4.866	5.902	2.051	0.0857006	1
Nfkb2	8.988	9.233	1.185	0.085717	1
Kat2a	4.769	3.795	0.509	0.0858212	1
Smg9	5.201	4.48	0.607	0.0858223	1
Eif3e	8.233	8.696	1.378	0.0858234	1
Rbck1	6.471	6.978	1.42	0.0858746	1
Shank1	5.954	6.675	1.648	0.085916	1
Antxr2	3.879	2.088	0.289	0.085935	1
Emc7	4.778	5.72	1.921	0.085955	1
Aimp1	6.825	7.342	1.431	0.0860571	1
Ankrd52	4.209	3.441	0.587	0.0861909	1
Thoc3	5.704	6.579	1.835	0.0862672	1
Plekhj1	5.798	6.037	1.18	0.0863024	1
Fam207a	7.04	6.285	0.592	0.0863272	1
Gm13483	2.596	4.542	3.854	0.0863278	1
Arfgef1	5.686	5.979	1.225	0.0863498	1
Nup98	2.267	3.58	2.485	0.0864523	1
H1f0	5.297	3.92	0.385	0.086503	1
Pum1	7.162	6.455	0.612	0.086514	1
Med9	4.438	3.854	0.667	0.0866401	1
Rrp36	4.358	5.403	2.064	0.0868466	1
Pex26	1.489	2.972	2.795	0.0869178	1
Srebf2	7.789	6.784	0.498	0.0871227	1
Gm24095	1.592	2.565	1.963	0.0871418	1
Atp6v1g1	6.095	6.615	1.434	0.0871445	1
Lrrc32	3.467	2.4	0.477	0.087153	1
Ube2e3	6.244	6.492	1.187	0.0872543	1
Casp8ap2	5.645	4.625	0.493	0.0873021	1
E430018J23Rik	2.337	2.977	1.558	0.087411	1
Hps5	3.43	4.411	1.973	0.0875462	1
Cklf	3.613	4.697	2.12	0.0875622	1
Ivd	4.641	3.817	0.565	0.0875716	1
Dkc1	7.545	7.862	1.246	0.0877748	1
Dcaf5	4.928	5.59	1.582	0.0878085	1
Efl1	4.32	5.494	2.255	0.0878204	1
Zfp207	7.615	7.139	0.719	0.0879416	1
Ess2	3.923	4.097	1.128	0.0879575	1
Commd8	5.656	5.216	0.737	0.0881061	1
Pdcl	2.518	3.684	2.244	0.0881328	1
Rpl6	9.441	9.907	1.382	0.0881617	1
Cfp	6.654	5.446	0.433	0.0882066	1
Csnk1e	6.396	4.968	0.372	0.0882447	1
Casd1	4.246	5.007	1.695	0.0882511	1
Vars	8.41	7.875	0.691	0.0883701	1
Rad51d	4.732	5.599	1.825	0.0883761	1
Fubp1	7.274	6.83	0.735	0.0884296	1
Hspa9	8.211	8.816	1.521	0.0886533	1
Slc33a1	4.175	3.347	0.563	0.0886542	1
Vps13a	5.652	4.576	0.474	0.0887015	1
Bbx	5.394	5.962	1.482	0.0887344	1
Nfat5	5.113	6.264	2.222	0.0887973	1
Itgb3bp	3.716	2.328	0.382	0.0887986	1
Ly6e	10.39	9.667	0.606	0.0889085	1
Gm54099	2.798	1.852	0.519	0.0889119	1
Rcc1	6.848	5.713	0.455	0.0889438	1
Lyst	7.058	6.29	0.587	0.0889612	1
Sp3	5.81	5.059	0.594	0.0889952	1
Rsl1d1	7.912	7.431	0.716	0.0890723	1
Polm	5.222	4.045	0.442	0.0891293	1
Usp3	5.163	5.728	1.479	0.0892122	1
Man2c1	5.081	4.37	0.611	0.0892251	1
n-TDgtc13	1.721	2.776	2.078	0.0893422	1
Rpl21	9.59	10.777	2.276	0.0894044	1
Paxip1	4.783	4.451	0.794	0.089483	1
Dmwd	3.695	1.425	0.207	0.0896538	1
Uqcc2	5.259	5.613	1.278	0.0896847	1
Rabgef1	3.869	3.611	0.836	0.0897263	1
Cyth4	5.471	5.944	1.388	0.0897335	1
Macroh2a1	8.442	7.974	0.723	0.08979	1
H3f3a	5.747	5.288	0.727	0.089811	1
Nrbf2	3.071	2.581	0.712	0.0898501	1
Atp1b3	5.897	6.895	1.998	0.0898588	1
Tbl2	3.986	5.11	2.18	0.0899362	1
Tle5	7.621	7.823	1.151	0.0899369	1
Hinfp	3.036	4.673	3.109	0.0899736	1
Pip4p1	6.195	6.544	1.274	0.0900378	1
Usp24	5.846	5.215	0.646	0.0900438	1
Rbis	5.756	6.76	2.005	0.0900729	1
Cdk10	3.455	4.793	2.527	0.0900953	1
Ppm1k	4.473	4.226	0.843	0.0901882	1
Satb1	8.452	7.601	0.554	0.0902263	1
Txnrd3	2.514	4.303	3.456	0.0902594	1
H2-DMa	9.26	9.58	1.248	0.0902637	1
Snord13	6.175	5.379	0.576	0.090316	1
Dennd3	4.304	2.885	0.374	0.0903287	1
Mkln1	5.439	5.628	1.14	0.0903708	1
Gm35358	2.854	4.082	2.342	0.0903793	1
Aff3	5.866	6.488	1.54	0.0905794	1
Glipr2	5.23	5.74	1.425	0.090603	1
Mcm3	8.022	7.201	0.566	0.0907244	1
Gimap7	4.667	2.75	0.265	0.0907758	1
Nfyb	6.06	5.616	0.735	0.0908059	1
Gm54326	2.125	2.529	1.323	0.0908424	1
Cyb5d1	5.176	5.475	1.23	0.0908721	1
Sowahc	3.198	4.353	2.226	0.0909056	1
Scap	5.553	5.894	1.267	0.0909398	1
Ctnnb1	7.254	7.746	1.406	0.0909891	1
Fnta	5.131	6.191	2.084	0.09118	1
Ptms	6.371	5.221	0.451	0.0911959	1
Hipk1	6.081	6.427	1.271	0.0913503	1
Ccdc88b	4.737	4.07	0.63	0.0914432	1
Timm10b	6.506	6.228	0.825	0.0914623	1
Ebi3	5.75	7.635	3.696	0.0915267	1
Tnnt2	3.957	4.619	1.582	0.0916874	1
Tcf7l2	2.886	2.175	0.611	0.0917046	1
Dpm2	5.897	6.342	1.362	0.0917902	1
Gmds	3.161	4.223	2.088	0.0918242	1
Adamtsl4	3.417	2.333	0.472	0.092142	1
Grk2	8.737	8.288	0.733	0.0921473	1
Nmral1	4.956	2.969	0.252	0.0921759	1
Psmc5	6.485	7.787	2.466	0.0922678	1
Rdh10	1.157	2.891	3.325	0.0923306	1
Septin1	6.577	5.868	0.612	0.0924034	1
Marcks	8.515	9.861	2.542	0.0924139	1
Cdca2	6.333	5.387	0.519	0.0926274	1
Lrrc47	6.539	6.167	0.772	0.0927595	1
Rps4x	9.41	10.232	1.768	0.0928805	1
Sem1	7.614	7.826	1.159	0.0929527	1
Bcorl1	3.686	4.501	1.759	0.0929847	1
Psmb7	6.437	7.428	1.986	0.0929977	1
Zc3h15	6.977	7.505	1.442	0.0932004	1
Trp53i11	6.137	4.982	0.449	0.0932633	1
Exosc10	5.39	5.869	1.394	0.0933898	1
Ifi27l2a	5.737	4.451	0.41	0.0933937	1
Ddx6	8.58	7.837	0.597	0.0934162	1
Spryd3	5.334	6.235	1.867	0.0934401	1
Srsf5	7.175	7.252	1.055	0.0936427	1
Wdr26	10.034	9.513	0.697	0.0936533	1
Scpep1	8.186	8.536	1.275	0.0937427	1
Rapgef1	9.286	8.723	0.677	0.0938166	1
Stx7	6.137	6.497	1.283	0.0938453	1
P3h1	3.31	2.254	0.481	0.0938943	1
Lsm2	5.237	4.506	0.602	0.0939841	1
Tex264	5.849	6.28	1.348	0.0942865	1
Nrde2	5.589	4.993	0.661	0.0943494	1
Adck5	3.508	3.042	0.724	0.094427	1
Cd2bp2	5.982	6.673	1.615	0.094448	1
Reep5	6.548	7.474	1.901	0.0944535	1
Cdc37l1	6.953	6.629	0.798	0.0944903	1
Taf7	4.108	3.14	0.511	0.0945238	1
Scoc	3.665	4.447	1.719	0.0945489	1
Myof	4.483	2.239	0.211	0.0945765	1
Dusp1	3.445	2.647	0.575	0.0945768	1
Bltp2	6.031	6.652	1.538	0.0945867	1
Vps35l	6.204	5.469	0.601	0.09459	1
Cbfa2t3	6.292	5.123	0.445	0.0946071	1
Fuca1	7.674	8.191	1.43	0.0947047	1
Reep3	6.96	6.637	0.799	0.0947142	1
Cenpe	7.527	5.109	0.187	0.094722	1
Ttc7b	2.887	3.959	2.103	0.0948202	1
Prune2	2.384	4.694	4.956	0.0948205	1
Ppm1a	7.194	6.581	0.654	0.0948248	1
Spag1	1.26	2.817	2.942	0.0948569	1
5031434O11Rik	1.493	2.216	1.65	0.0948724	1
Ankrd17	7.065	7.677	1.529	0.094899	1
Fam118b	4.961	4.355	0.657	0.094915	1
Tap1	6.913	7.132	1.164	0.0949653	1
Eif2b3	3.96	4.827	1.824	0.0950658	1
Tcap	1.197	2.814	3.067	0.0951374	1
Tmem30a	5.395	6.008	1.53	0.0952028	1
Dleu2	3.019	1.222	0.288	0.0952193	1
Lpcat1	7.602	7.171	0.742	0.0952217	1
Rn7sk	6.664	8.018	2.557	0.095376	1
Lamp2	7.536	7.175	0.779	0.0955024	1
Ptpn1	8.215	8.488	1.208	0.0955065	1
Gfer	6.044	6.892	1.8	0.0956152	1
Mcm5	6.428	5.848	0.669	0.0956659	1
Uba2	5.873	5.446	0.743	0.0956831	1
Shisa8	2.634	4.622	3.967	0.0958324	1
Cnnm1	2.182	4.107	3.796	0.0959274	1
Tle3	5.381	4.779	0.659	0.0959753	1
Zfp628	4.711	3.816	0.538	0.0959964	1
1700086O06Rik	2.883	1.152	0.301	0.0962066	1
Sgpp1	4.22	5.459	2.361	0.0962733	1
Aurkaip1	6.024	6.514	1.404	0.0963139	1
Adck2	4.16	3.907	0.839	0.0964523	1
Ctdp1	5.186	4.426	0.591	0.0964581	1
Efr3a	6.659	6.919	1.197	0.0966219	1
Gm51897	3.033	3.704	1.592	0.0968974	1
Stox2	2.046	3.31	2.402	0.0969064	1
Rab29	4.767	3.7	0.477	0.0970002	1
Lsm4	7.038	6.531	0.704	0.0971053	1
Morc3	3.634	3.362	0.828	0.097129	1
Get3	5.59	5.181	0.753	0.0971594	1
Scd1	7.983	6.558	0.372	0.0972326	1
Asnsd1	5.606	5.806	1.149	0.0973194	1
Egr3	4.396	3.376	0.493	0.0973344	1
Mak16	6.046	6.609	1.477	0.0974868	1
Ggta1	5.014	4.188	0.564	0.0976152	1
Rnf13	3.069	4.809	3.34	0.0976463	1
Gzf1	2.077	3.342	2.402	0.0976847	1
Taf5	4.216	3.411	0.572	0.0977237	1
Fmnl3	5.456	5.848	1.312	0.097748	1
Zfpm1	6.195	5.54	0.635	0.0977693	1
Nop58	7.649	8.151	1.417	0.0978726	1
Nacc2	1.489	2.778	2.443	0.0981407	1
Rnf25	2.101	1.084	0.494	0.0981582	1
Arhgap6	2.333	1.278	0.481	0.0981892	1
Mfsd8	1.316	2.051	1.664	0.0982088	1
Reps1	4.747	4.973	1.17	0.0982315	1
Erp29	7.296	7.801	1.419	0.0982569	1
Ociad1	6.817	7.471	1.574	0.0982667	1
Lyrm1	1.588	3.759	4.501	0.0983144	1
Ctcf	7.923	7.513	0.753	0.0983152	1
Hdac7	8.253	7.447	0.572	0.0983775	1
Rpp21	5.979	5.434	0.685	0.0987328	1
Rasgrp4	3.306	2.316	0.504	0.0987702	1
Rad50	6.843	5.88	0.513	0.0991254	1
Eif4a2	5.536	6.869	2.518	0.0993739	1
Rasal3	6.803	6.403	0.758	0.0994138	1
Gbp8	3.034	1.487	0.342	0.0995214	1
Pkib	5.091	5.596	1.418	0.0995686	1
Capn15	3.798	4.524	1.654	0.099583	1
Rpl23a	11.86	11.709	0.901	0.0995953	1
Wrnip1	4.778	4.118	0.633	0.0995986	1
Gpn3	2.102	3.028	1.9	0.0996989	1
Tmpo	7.202	6.178	0.492	0.0997427	1
Gm36449	8.292	8.609	1.246	0.0998436	1
Pik3r6	2.134	3.489	2.557	0.100123	1
Csf2ra	6.237	5.554	0.623	0.100132	1
Hps4	5.334	4.029	0.405	0.100221	1
Tmem64	3.683	4.055	1.294	0.100239	1
Kntc1	4.338	2.046	0.204	0.100287	1
Ubl7	5.115	5.98	1.82	0.100344	1
Crip1	4.396	3.457	0.522	0.100366	1
Gdi1	5.488	6.471	1.976	0.100386	1
Crat	4.541	3.187	0.391	0.100396	1
Rpl36a	10.795	11.471	1.598	0.10046	1
Uba6	3.891	2.989	0.535	0.100771	1
Cops8	5.263	5.951	1.611	0.100992	1
Sp140	8.876	7.719	0.448	0.101046	1
Yipf2	5.14	4.912	0.854	0.101047	1
Lsm5	2.694	2.997	1.233	0.101079	1
Banp	6.174	6.428	1.193	0.101249	1
Lancl1	5.337	5.151	0.879	0.101325	1
Tmem144	1.676	2.315	1.557	0.10143	1
Slc4a7	6.357	7.262	1.873	0.101464	1
Apool	3.34	4.072	1.662	0.101521	1
BC031181	6.067	6.918	1.804	0.101554	1
Snord14d	2.317	3.989	3.187	0.101598	1
Adamts14	4.116	2.374	0.299	0.101613	1
Ptpn4	3.72	2.666	0.482	0.101667	1
Kctd17	2.836	4.176	2.532	0.101734	1
Rrm1	6.258	5.504	0.593	0.101784	1
Dcaf17	4.955	5.513	1.473	0.10188	1
Nomo1	5.547	6.356	1.752	0.101999	1
Sec13	5.464	7.028	2.956	0.102044	1
Acbd3	6.565	7.252	1.61	0.102158	1
H2-T24	4.518	2.319	0.218	0.102178	1
Prkar1a	8.641	8.48	0.894	0.102195	1
Psme3	6.873	6.499	0.772	0.102214	1
Eldr	2.52	2.22	0.812	0.102247	1
Nptn	6.04	6.606	1.48	0.102323	1
Gorasp1	2.511	3.392	1.841	0.102425	1
Saal1	3.935	3.053	0.543	0.102873	1
Frs2	3.84	2.874	0.512	0.102877	1
Mcm6	6.953	6.12	0.561	0.102924	1
Eif2ak1	5.542	5.811	1.205	0.102933	1
Msantd2	5.722	5.223	0.707	0.10299	1
Foxred1	4.473	3.696	0.583	0.10308	1
Cd82	5.715	6.386	1.593	0.103097	1
Alcam	6.088	6.573	1.399	0.103143	1
Srgn	9.231	9.763	1.446	0.103154	1
Knstrn	5.476	3.854	0.325	0.103219	1
Adk	4.842	4.495	0.786	0.103304	1
Gm39383	3.225	1.407	0.284	0.103351	1
Ybx1	10.916	10.171	0.597	0.103575	1
Eml2	6.811	6.127	0.622	0.103736	1
Cope	6.812	7.349	1.451	0.103797	1
Cks1b	7.463	6.388	0.475	0.103818	1
Gmeb1	6.193	5.327	0.549	0.103834	1
Cdc20	6.936	4.307	0.162	0.103835	1
Tma7	5.888	6.539	1.57	0.103889	1
Cotl1	8.843	7.214	0.323	0.103942	1
Ifi209	4.067	2.895	0.444	0.104084	1
Hnrnpl	7.781	7.09	0.619	0.104102	1
Prrc2b	6.387	5.759	0.647	0.104158	1
Tmem242	7.137	6.7	0.739	0.104182	1
Rars	6.032	6.789	1.69	0.10423	1
Ticam2	5.744	6.4	1.576	0.104272	1
Gm9222	3.565	2.51	0.481	0.104466	1
Kif4	5.046	3.692	0.391	0.104489	1
Psmc3	7.245	7.96	1.642	0.104577	1
Pycard	6.235	5.315	0.529	0.10465	1
St13	8.067	8.314	1.186	0.104654	1
Pced1b	6.672	5.617	0.481	0.104735	1
Traf4	4.96	2.562	0.19	0.104918	1
Morf4l2	4.292	5.095	1.745	0.104938	1
Adam19	6.792	6.072	0.607	0.105003	1
Haus3	4.865	3.791	0.475	0.105011	1
Cd55	5.26	3.921	0.395	0.105054	1
Fn1	3.054	2.155	0.536	0.105075	1
Sfmbt2	1.936	2.883	1.929	0.10529	1
Mark4	5.587	5.007	0.669	0.105375	1
Taf1d	7.749	7.867	1.086	0.105451	1
Iqgap3	4.589	3.088	0.353	0.105487	1
Anln	2.086	1.032	0.482	0.105529	1
Glud1	7.319	6.843	0.719	0.105553	1
Camkmt	1.259	3.518	4.785	0.105636	1
Fus	10.178	7.881	0.204	0.105757	1
Gapdh	6.767	7.925	2.232	0.105878	1
Hmgb2	8.365	7.139	0.427	0.106281	1
Syncrip	7.173	6.942	0.852	0.106281	1
Gtf3c2	6.196	6.803	1.523	0.106378	1
Klf9	5.626	4.715	0.532	0.106398	1
Golga7	2.31	4.103	3.465	0.106421	1
Psmc1	8.553	7.964	0.665	0.106555	1
Mink1	2.237	2.913	1.598	0.10656	1
Prorsd1	5.766	5.538	0.854	0.106566	1
Crim1	3.271	2.086	0.44	0.106756	1
Atp11c	3.546	4.674	2.187	0.106902	1
Blcap	4.748	5.629	1.841	0.106966	1
Imp4	5.409	6.331	1.895	0.10702	1
Cd274	5.517	3.653	0.275	0.107146	1
Dapk3	3.686	3.13	0.681	0.107158	1
Cox5b	7.558	7.991	1.35	0.107181	1
Fam162a	4.616	5.675	2.083	0.107228	1
Micall1	5.166	4.682	0.715	0.107327	1
Gm50601	4.23	3.24	0.503	0.107372	1
Snrpc	5.46	4.36	0.467	0.107374	1
Socs2	7.445	8.294	1.802	0.107376	1
Mettl2	5.258	6.738	2.79	0.107387	1
Senp8	2.684	3.827	2.208	0.107463	1
Ptcd2	6.482	5.942	0.688	0.107471	1
Gm38865	8.563	6.856	0.306	0.107524	1
Guk1	5.592	5.338	0.838	0.107567	1
Gabpb2	6.724	6.233	0.711	0.107648	1
Itfg2	3.719	3.099	0.651	0.107665	1
Zfp362	7.427	6.838	0.665	0.1077	1
Ints10	3.72	2.778	0.52	0.107708	1
Gm11478	5.233	7.097	3.64	0.107771	1
Vcam1	1.221	1.819	1.514	0.108097	1
Kmo	5.944	5.094	0.555	0.108237	1
Pfkp	5.718	6.395	1.599	0.108238	1
Abcd1	5.67	5.063	0.657	0.108302	1
Carmil2	6.29	4.704	0.333	0.108346	1
Mrpl48	5.277	4.812	0.725	0.108361	1
Mrps6	4.913	6.288	2.594	0.108522	1
Kidins220	5.761	6.449	1.611	0.10864	1
Zfp746	3.242	4.408	2.245	0.108651	1
Eaf2	5.363	3.322	0.243	0.108728	1
Bnip3	4.028	5.066	2.053	0.108729	1
Rfc4	4.269	2.448	0.283	0.10887	1
Strbp	9.725	9.425	0.812	0.108906	1
Acot13	5.81	6.365	1.47	0.109128	1
Tbrg3	4.065	2.429	0.322	0.109136	1
Cyth1	6.539	5.837	0.614	0.109168	1
Ptges3l	2.878	2.072	0.572	0.109251	1
Sfxn1	7.653	7.34	0.805	0.109261	1
Tfb2m	2.051	3.224	2.255	0.109301	1
Trmo	3.835	2.871	0.512	0.109332	1
Pwp1	5.354	5.864	1.424	0.109354	1
Fbxl15	2.561	4.719	4.462	0.109363	1
Fbrs	6.552	6.753	1.15	0.109459	1
Celf2	8.932	8.047	0.542	0.109504	1
Cnppd1	8.307	7.906	0.757	0.109506	1
Meis3	5.53	3.051	0.179	0.109599	1
Dusp2	6.952	6.438	0.701	0.10964	1
Khk	2.692	1.674	0.494	0.109683	1
Zfp758	3.058	3.958	1.867	0.109695	1
Ccdc127	4.586	5.468	1.843	0.109754	1
Xpo5	4.859	5.729	1.827	0.109758	1
Rabl6	6.713	6.361	0.784	0.109949	1
Mettl22	2.537	3.482	1.925	0.109964	1
Use1	7.605	7.933	1.255	0.110117	1
Syne1	4.895	4.458	0.739	0.110152	1
Psmc3ip	3.284	1.554	0.301	0.110243	1
Cd40	5.881	7.03	2.218	0.11037	1
Tmem59	6.279	6.68	1.32	0.110376	1
Sirpa	2.539	4.373	3.564	0.11045	1
Gm41949	4.864	5.71	1.797	0.110458	1
Gas8	3.119	4.039	1.892	0.110509	1
Hycc1	6.425	5.461	0.513	0.110515	1
Rmrp	2.456	3.972	2.858	0.110719	1
Mns1	4.487	3.37	0.461	0.11084	1
Dtx3	6.388	5.66	0.604	0.110923	1
Rragd	4.452	3.319	0.456	0.111035	1
Iqsec1	6.994	6.788	0.867	0.111078	1
Nf2	5.565	5.444	0.92	0.111104	1
Sap18	2.871	4.728	3.621	0.111105	1
Zc3h4	6.569	6.096	0.721	0.111356	1
Gm2a	7.003	7.595	1.507	0.11139	1
Abraxas1	3.321	4.08	1.693	0.111423	1
Jade3	2.799	3.934	2.196	0.111467	1
Ap1s1	5.765	5.291	0.72	0.111485	1
Sfpq	8.826	8.51	0.804	0.111486	1
Sdf2	5.699	6.173	1.389	0.111503	1
Golm1	2.995	1.109	0.271	0.111515	1
Soat2	2.529	3.768	2.36	0.111527	1
Syngr2	9.464	10.129	1.585	0.11153	1
E030030I06Rik	4.367	3.516	0.554	0.111553	1
Rpl19	7.547	8.349	1.744	0.111588	1
Arl6ip1	9.008	8.9	0.928	0.111592	1
Ptbp3	8.527	7.944	0.667	0.111631	1
Ppp2r3c	5.535	4.605	0.525	0.111683	1
Sec61a1	8.758	9.296	1.452	0.111694	1
Rusf1	3.456	2.446	0.496	0.111779	1
Fcho2	3.973	2.612	0.39	0.111878	1
Bloc1s4	4.239	5.19	1.933	0.111957	1
Rnf40	5.058	5.597	1.453	0.111975	1
Gm31718	4.3	4.799	1.413	0.112054	1
Sh3tc1	3.626	2.41	0.431	0.112075	1
Snhg1	6.632	7.008	1.298	0.11209	1
Kif3c	2.854	1.012	0.279	0.112132	1
Ncapd2	8.047	6.649	0.38	0.112203	1
Lipa	5.484	4.894	0.664	0.112229	1
Nubp1	6.935	6.563	0.772	0.112232	1
Arl5a	2.263	3.487	2.336	0.112331	1
Glrx2	4.917	5.923	2.008	0.112342	1
Ankrd1	2.664	3.055	1.311	0.112406	1
Nisch	6.566	7.202	1.555	0.112459	1
Tmem70	5.049	5.694	1.564	0.112499	1
Krtcap2	7.965	8.476	1.425	0.112571	1
Map2k5	4.346	4.627	1.215	0.112663	1
Cdca3	6.146	4.759	0.382	0.112732	1
Ndufa3	7.223	7.54	1.246	0.112851	1
Zmym5	5.411	5.99	1.495	0.112883	1
Lmf2	4.236	4.622	1.307	0.112919	1
Rabac1	6.773	7.623	1.802	0.11292	1
CYTB	12.596	12.863	1.204	0.113053	1
Ppm1h	4.864	5.552	1.611	0.113203	1
Ube2m	6.109	6.65	1.456	0.113215	1
Actmap	3.787	3.148	0.642	0.113268	1
Ganab	6.888	6.972	1.06	0.113269	1
Gm24507	2.3	3.643	2.537	0.113288	1
Eef1a1	11.014	11.263	1.188	0.113298	1
Rassf6	3.234	3.671	1.354	0.113392	1
Ache	3.332	4.491	2.233	0.113533	1
Aspm	6.244	3.825	0.187	0.113554	1
9130401M01Rik	4.861	6.01	2.218	0.113628	1
Ncapd3	4.837	3.69	0.452	0.113858	1
Incenp	7.127	5.799	0.398	0.113891	1
Rab4b	7.07	6.699	0.773	0.113976	1
Gatd3a	5.391	6.528	2.199	0.114019	1
Selenok	6.537	6.99	1.368	0.114352	1
Ric1	4.216	4.97	1.686	0.114397	1
Fam53c	5.683	5.107	0.671	0.114437	1
Flt3	3.514	2.949	0.676	0.114538	1
Ppp6r3	7.698	7.438	0.835	0.114539	1
Mybl1	4.138	2.311	0.282	0.114575	1
Rph3al	2.336	1.185	0.45	0.114762	1
Ighm	11.669	10.93	0.599	0.114956	1
Rab27a	3.188	3.93	1.672	0.115141	1
Mapk9	3.753	5.039	2.438	0.115277	1
Taf10	7.727	7.452	0.827	0.115288	1
St6gal1	8.536	8.257	0.824	0.115362	1
Eif3d	7.104	7.68	1.491	0.115364	1
Abcg1	4.892	3.525	0.387	0.115384	1
Nusap1	7.688	5.382	0.202	0.115437	1
Gm33682	4.831	5.748	1.887	0.115439	1
Itm2c	6.501	7.199	1.622	0.115449	1
Ttll4	3.446	2.665	0.582	0.11546	1
Mrpl19	5.196	5.567	1.293	0.115578	1
Smn1	5.809	6.451	1.56	0.115623	1
1700025G04Rik	3.372	2.452	0.528	0.11565	1
Nadk	4.925	6.007	2.117	0.11565	1
Nrp2	3.661	4.654	1.99	0.115844	1
Rnf123	6.117	5.326	0.578	0.115886	1
Cyp51	7.809	7.208	0.659	0.115904	1
Cetn3	8.813	7.744	0.477	0.11591	1
Lrrc42	6.209	5.392	0.568	0.115959	1
Tpt1	8.854	9.732	1.838	0.116058	1
Ythdf3	7.26	6.614	0.639	0.116089	1
Syce2	4.173	3.242	0.524	0.116141	1
Atad3a	4.492	5.389	1.862	0.116156	1
Kctd11	2.438	3.587	2.218	0.116221	1
Zfp87	4.401	3.773	0.647	0.116238	1
Ttc19	3.375	3.714	1.264	0.116257	1
Tkt	7.893	7.331	0.677	0.116296	1
Cep152	4.569	4.159	0.753	0.116313	1
Vkorc1	4.372	5.255	1.844	0.11647	1
H2-Ab1	12.386	11.993	0.762	0.11649	1
Nol8	5.462	6.164	1.627	0.116574	1
Hnrnpll	2.996	1.881	0.462	0.116643	1
Tap2	7.417	6.567	0.555	0.116767	1
Cenpm	6.388	4.366	0.246	0.116828	1
Suv39h1	5.458	4.472	0.505	0.116923	1
Zfp783	1.371	3.025	3.146	0.11693	1
Oxct1	8.064	7.381	0.623	0.116979	1
Zc3h8	3.642	3.293	0.785	0.117033	1
Bloc1s1	2.04	4.525	5.599	0.117054	1
Fignl1	4.499	3.317	0.441	0.117177	1
Gpr108	4.9	5.923	2.032	0.117261	1
Gm41113	1.543	2.311	1.703	0.117281	1
Ptpmt1	4.46	5.14	1.602	0.117293	1
Ppp2r1b	4.899	5.474	1.49	0.117293	1
Traf3	5.598	5.278	0.801	0.117456	1
Vav1	5.914	7.042	2.185	0.117603	1
Mapkbp1	3.287	4.055	1.703	0.117644	1
Nmt1	7.979	8.18	1.15	0.117703	1
Tmem14c	7.165	7.572	1.326	0.117753	1
Polr2j	5.96	6.117	1.115	0.117866	1
Letm1	5.689	6.623	1.911	0.117933	1
Rab24	7.108	7.246	1.1	0.118029	1
Pisd-ps3	6.278	7.173	1.859	0.118084	1
Nsd2	6.649	5.605	0.485	0.118116	1
Ndufs4	5.741	6.484	1.675	0.118126	1
Acer3	3.426	1.596	0.281	0.118165	1
Serinc3	10.013	9.469	0.686	0.118236	1
Cd22	8.482	7.435	0.484	0.11832	1
Spg7	5.498	6.073	1.49	0.118348	1
2010315B03Rik	4.122	3.226	0.537	0.118444	1
Kcnd2	1.577	3.613	4.099	0.118451	1
Parvg	7.892	7.38	0.701	0.118463	1
Dmxl1	5.356	4.053	0.405	0.11866	1
Uxt	3.217	4.336	2.173	0.118676	1
Csnk1d	6.65	7.516	1.822	0.118936	1
Eif3g	7.609	7.896	1.221	0.118966	1
Cltc	8.348	8.523	1.128	0.118985	1
Rnf168	5.753	6.463	1.635	0.119048	1
Bcl9	5.32	4.736	0.667	0.119071	1
Bcr	4.172	5.186	2.019	0.119098	1
Ccdc170	3.18	1.084	0.234	0.119119	1
5730408K05Rik	5.674	4.854	0.567	0.11913	1
Ppp3cb	6.475	6.006	0.722	0.119253	1
Slc35c2	6.192	5.213	0.507	0.119313	1
Ckap2l	5.798	3.763	0.244	0.119392	1
Cdkal1	4.921	4.421	0.707	0.119424	1
Vangl2	4.875	3.617	0.418	0.119521	1
Cd96	3.611	4.322	1.636	0.119679	1
Pltp	4.128	5.109	1.974	0.119682	1
Rcc2	8.699	7.94	0.591	0.119685	1
Armt1	4.536	4.226	0.807	0.119727	1
Nampt	7.407	7.144	0.833	0.119877	1
Tmtc4	1.29	3.562	4.832	0.11988	1
Grsf1	5.012	4.416	0.662	0.119884	1
Pptc7	7.612	8.445	1.782	0.119983	1
Trp53i13	2.395	1.365	0.49	0.120024	1
Rbm19	3.564	4.385	1.767	0.120084	1
Pdha1	5.583	6.167	1.498	0.12009	1
Mgat4b	5.105	4.017	0.47	0.12014	1
Rtn4	6.504	7.155	1.571	0.12017	1
Rdx	7.039	7.51	1.386	0.120245	1
Tbc1d13	4.983	5.709	1.653	0.120387	1
Ufd1	6.603	6.314	0.819	0.120432	1
Stradb	4.953	4.119	0.561	0.120445	1
Gnai2	9.829	9.715	0.924	0.120525	1
Trim12c	5.557	4.59	0.512	0.120629	1
Slc25a13	4.642	2.576	0.239	0.120658	1
Gigyf1	6.818	6.438	0.768	0.120663	1
Tsr1	4.716	6.138	2.679	0.12074	1
Khdc4	5.854	6.571	1.644	0.120789	1
Ndufa6	7.365	8.3	1.912	0.120855	1
Dnaaf2	5.282	5.775	1.408	0.120875	1
Rpl22	10.597	10.773	1.13	0.120934	1
Etnk1	7.26	6.784	0.719	0.12106	1
Gbe1	3.118	4.767	3.136	0.121207	1
Rbm3	2.607	4.027	2.677	0.121257	1
Hdac9	5.624	4.237	0.382	0.121338	1
Trmt12	2.714	3.642	1.903	0.121424	1
Rpl37	11.664	12.134	1.385	0.121427	1
Irf2	7.499	6.68	0.567	0.121471	1
Hnrnph2	2.747	1.857	0.54	0.121521	1
Lgals8	6.458	5.759	0.616	0.121596	1
Rnmt	4.592	5.727	2.196	0.121598	1
Eif2ak4	4.828	4.553	0.826	0.1216	1
Rrp7a	2.653	4.177	2.876	0.121685	1
Psmg2	5.326	6.21	1.845	0.121806	1
D16Ertd472e	6.93	5.972	0.515	0.121875	1
Nktr	6.847	7.305	1.374	0.122054	1
Snord104	2.794	4.511	3.287	0.122139	1
Rab8a	7.697	7.441	0.837	0.122154	1
Nup50	6.328	6.558	1.172	0.122173	1
Rpl39	9.499	10.181	1.605	0.122195	1
Gprin3	2.488	5.655	8.982	0.122255	1
Cspg5	1.577	3.284	3.263	0.122263	1
Mtmr14	5.936	6.287	1.275	0.122389	1
Sp3os	3.795	4.528	1.661	0.122392	1
Il2ra	3.916	4.863	1.927	0.12244	1
Cnnm4	1.654	3.48	3.545	0.12245	1
Mdn1	6.686	7.359	1.594	0.122618	1
Med24	4.876	4.095	0.582	0.122668	1
Myc	3.748	4.29	1.456	0.122715	1
Pitpnm2	5.472	5.079	0.761	0.122746	1
Spata5l1	3.091	1.403	0.31	0.122774	1
Pcm1	6.325	6.033	0.817	0.122806	1
Cdk2	6.189	5.014	0.443	0.122809	1
Igha	2.715	1.446	0.415	0.122865	1
Mrpl58	5.356	5.016	0.79	0.122945	1
Cyfip2	9.033	8.615	0.748	0.122949	1
Usp36	6.338	6.889	1.465	0.122973	1
Nfatc2	2.983	3.595	1.528	0.122996	1
Tex261	7.369	7.731	1.285	0.123016	1
Cmah	5.761	4.344	0.375	0.12312	1
Xrcc6	4.417	2.855	0.339	0.123198	1
1700056E22Rik	1.131	2.638	2.841	0.123206	1
Tcf19	5.234	4.218	0.494	0.123267	1
Mtif3	4.675	4.085	0.665	0.123274	1
Atxn2l	7.254	6.557	0.617	0.123363	1
Gm30064	3.126	4.733	3.047	0.123591	1
Hivep3	7.974	5.345	0.162	0.123686	1
Cpeb4	4.626	5.866	2.363	0.123698	1
Gm20506	5.035	3.58	0.365	0.123718	1
5830417I10Rik	5.214	5.757	1.457	0.123829	1
Zfp322a	4.468	5.39	1.895	0.123854	1
Golga2	6.386	7.309	1.897	0.12388	1
Rps6	6.763	8.124	2.568	0.123948	1
Trib2	6.819	4.731	0.235	0.12396	1
Ier3ip1	7.014	7.689	1.597	0.123983	1
Psme2	6.417	7.738	2.499	0.124001	1
Cd52	10.232	10.854	1.539	0.124054	1
Ndc80	4.773	3.232	0.344	0.124078	1
Mir155hg	3.587	4.432	1.796	0.124119	1
Thtpa	3.195	2.383	0.57	0.124215	1
Map2k1	5.443	6.311	1.825	0.124286	1
Trio	5.317	4.222	0.468	0.124304	1
Tbc1d4	4.547	3.262	0.41	0.124394	1
Sumo3	8.121	7.043	0.474	0.124408	1
Akap7	4.409	2.77	0.321	0.124412	1
Tesk1	4.926	5.555	1.546	0.124434	1
Pdlim5	3.775	4.266	1.405	0.124468	1
Nrd1	7.147	6.828	0.802	0.124746	1
Ppp4r1l-ps	1.232	2.785	2.933	0.124795	1
Adipoq	3.906	2.836	0.477	0.124847	1
Frrs1	4.653	3.718	0.523	0.124858	1
Dennd6b	3.621	2.491	0.457	0.12495	1
Ints13	5.319	4.937	0.767	0.124986	1
Mtss1	6.532	5.867	0.631	0.1251	1
Cd2	4.772	1.875	0.134	0.125364	1
E130307A14Rik	1.771	3.549	3.43	0.125365	1
Bank1	5.657	4.327	0.398	0.125464	1
Nsrp1	5.722	6.077	1.279	0.125506	1
Skil	3.673	4.979	2.471	0.12555	1
Dhrs3	4.258	5.155	1.862	0.125589	1
Pfkl	5.175	6.16	1.979	0.125636	1
Snrnp27	7.188	6.866	0.8	0.125693	1
mt-Rnr1	12.409	13.349	1.918	0.125704	1
Phlda3	4.854	6.053	2.296	0.125806	1
Psmb6	7.52	7.888	1.291	0.125854	1
Kif22	5.857	4.311	0.343	0.125948	1
Dcps	6.476	5.46	0.494	0.12595	1
Homer1	4.088	4.421	1.26	0.125966	1
Papss2	2.426	3.747	2.499	0.126046	1
Rttn	4.315	2.429	0.271	0.126054	1
Lypla2	7.532	6.916	0.652	0.126067	1
Vpreb3	7.176	4.56	0.163	0.126105	1
Man1c1	1.983	1.752	0.852	0.126201	1
Cep128	3.552	2.248	0.405	0.126237	1
Higd1a	4.851	5.708	1.811	0.126258	1
Ptdss2	3.411	4.101	1.613	0.126259	1
Pphln1	4.242	5.424	2.268	0.126332	1
Slc15a4	6.753	7.027	1.209	0.126386	1
Chpf2	5.512	6.248	1.666	0.126474	1
Ncoa2	3.65	4.62	1.959	0.126475	1
Ube2w	4.685	5.276	1.506	0.126506	1
Top1	9.367	8.948	0.748	0.126527	1
Prpf39	5.59	5.842	1.191	0.126645	1
Insr	2.257	3.976	3.291	0.126706	1
Zranb3	4.984	3.481	0.353	0.126795	1
Slc7a1	6.659	7.242	1.498	0.126826	1
2510022D24Rik	5.108	4.419	0.621	0.126878	1
Aunip	4.086	2.654	0.37	0.126915	1
Pdia4	7.319	6.615	0.614	0.12692	1
Lpar6	3.926	2.356	0.337	0.126971	1
Trappc4	5.729	6.628	1.865	0.127071	1
BC035044	4.525	5.61	2.12	0.127109	1
Mbd6	6.219	5.785	0.74	0.12719	1
Rplp0	11.158	11.424	1.203	0.127228	1
Nudt18	3.417	4.42	2.004	0.12733	1
Zfp395	4.227	3.138	0.47	0.127389	1
Zfp846	3.693	2.284	0.376	0.127466	1
Gart	5.118	5.984	1.822	0.127503	1
Eif3l	6.89	7.318	1.346	0.127558	1
Atat1	3.876	2.791	0.471	0.127672	1
Ppp1r16b	6.918	6.341	0.67	0.127691	1
Hcls1	8.865	8.454	0.752	0.127779	1
Rras2	4.828	5.788	1.944	0.127861	1
Calhm2	2.35	1.958	0.762	0.127888	1
Mxd4	8.758	7.94	0.567	0.127931	1
Btbd6	4.111	2.92	0.438	0.127943	1
Mre11a	5.003	4.55	0.731	0.128017	1
Pabpc1	10.71	10.299	0.752	0.128041	1
Ube2q2	2.504	3.287	1.72	0.128055	1
Clcn4	5.742	6.25	1.422	0.12807	1
Fam111a	7.178	5.107	0.238	0.128258	1
Ezh2	7.366	7.791	1.343	0.128332	1
Ssr4	8.098	8.526	1.346	0.128511	1
Pclaf	8.848	7.207	0.321	0.128536	1
Trak2	6.424	5.424	0.5	0.128541	1
Thra	3.794	2.982	0.57	0.128575	1
Ppp4r1	4.837	5.542	1.63	0.128587	1
Adipor1	5.443	5.838	1.315	0.128622	1
Pgrmc1	4.365	5.07	1.63	0.128688	1
Cmip	8.929	8.553	0.771	0.12871	1
Rhog	6.442	6.692	1.189	0.128752	1
Reep4	6.18	4.624	0.34	0.12876	1
Igf1r	4.546	3.59	0.515	0.128884	1
Sde2	6.698	6.235	0.725	0.129046	1
Kdelr2	6.457	7.243	1.725	0.12906	1
H2-DMb2	9.51	9.943	1.35	0.129253	1
Zfp646	3.308	4.732	2.682	0.129273	1
Frg1	7.203	6.37	0.561	0.12934	1
Gm30135	3.035	3.677	1.56	0.129343	1
Agfg2	6.654	4.776	0.272	0.129421	1
Zfp12	2.478	3.718	2.363	0.129428	1
Lime1	4.83	5.203	1.295	0.129622	1
Arid3a	7.432	6.477	0.516	0.129629	1
Mrps14	4.954	5.605	1.57	0.12968	1
Riok3	5.919	6.552	1.551	0.129716	1
Taok1	7.641	7.142	0.708	0.129815	1
Slc39a7	6.715	7.579	1.82	0.129846	1
Erap1	5.031	4.269	0.59	0.12989	1
Lin37	3.196	5.001	3.494	0.129908	1
Cmtm8	4.36	2.515	0.278	0.130036	1
Smc3	7.377	6.486	0.539	0.130119	1
2510039O18Rik	6.883	6.325	0.679	0.130322	1
Cd93	7.488	4.105	0.096	0.130446	1
Uqcrfs1	5.992	6.492	1.414	0.130451	1
9930104L06Rik	3.078	3.478	1.32	0.130545	1
[truncated: 8,902 more rows]

## Sheet: Table S2-2.
Table S2-2.Total gene lists in siOCA-B transfected naive B cells (Normalized data ≥1)
P-values were calculated using the Welch's t-test. q-values were calculated using the FDR(Benjamini Hochberg)
	Average of normalized data (Log 2)		Log2 fold change
Gene Symbol	siNC	siOCA-B	siOCA-B/siNC	p-value	q-value
Reep3	7.513	7.009	0.705	0.000495088	1
1810034E14Rik	1.554	2.391	1.786	0.00109009	1
Chmp1b2	2.814	2.336	0.718	0.0011716	1
Gm53438	3.296	1.739	0.34	0.00122425	1
Zfp961	3.825	2.503	0.4	0.00134378	1
Eif3m	6.888	6.149	0.599	0.00149308	1
Xrn2	6.72	7.285	1.48	0.00170288	1
Snx19	3.829	4.763	1.91	0.00178793	1
Zfp36l1	7.89	7.292	0.66	0.00182238	1
Dipk1a	4.981	4.324	0.634	0.00244817	1
Zfp800	7.368	6.64	0.604	0.00264092	1
Cav1	2.24	1.118	0.459	0.00330033	1
Ly6d	8.094	5.658	0.185	0.00334256	1
Ywhae	9.061	9.266	1.153	0.00342815	1
G2e3	5.003	3.674	0.398	0.00365247	1
Usp30	4.498	3.908	0.665	0.00404362	1
Smad2	3.865	4.862	1.996	0.00419717	1
Ass1	2.923	1.418	0.352	0.00441981	1
Lrp10	6.548	5.904	0.64	0.00455108	1
Yrdc	4.655	4.912	1.196	0.0046659	1
Macir	3.26	4.52	2.394	0.00540819	1
Rock1	8.775	8.334	0.736	0.00548872	1
Cnpy3	7.919	6.942	0.508	0.00572284	1
Ly6a	7.721	6.197	0.348	0.00582608	1
Glo1	5.487	4.919	0.674	0.00584314	1
Zbtb41	3.727	2.43	0.407	0.00631777	1
Yif1b	6.912	6.098	0.569	0.00637946	1
Mki67	7.28	6.572	0.612	0.00638822	1
Ccdc50	5.975	6.861	1.847	0.00661183	1
Acsl3	4.593	3.506	0.471	0.00662826	1
Apobec1	6.271	5.951	0.801	0.00678897	1
Gm31718	4.338	2.238	0.233	0.00690394	1
Sh3bp5	9.47	9.135	0.793	0.00690562	1
Abhd14a	3.195	3.755	1.474	0.00703397	1
Gm39323	5.115	2.862	0.21	0.00722911	1
Ldlrad4	1.525	3.618	4.268	0.00726097	1
Tmem167b	5.56	5.135	0.745	0.00730919	1
Slc25a14	2.361	3.454	2.133	0.00738244	1
Kctd1	5.311	4.212	0.467	0.00754191	1
Ddx21	8.786	8.516	0.829	0.00754234	1
Tpr	9.063	8.761	0.812	0.00759953	1
Ctnnal1	4.826	3.692	0.456	0.00795934	1
Tnk2	5.138	3.71	0.372	0.00796683	1
Cct6a	7.706	7.975	1.204	0.00811156	1
Bhlhe40	4.354	5.562	2.31	0.00852334	1
Ptpn11	4.763	5.337	1.488	0.00853042	1
Hikeshi	5.531	4.364	0.445	0.00897146	1
Oxsr1	3.625	4.246	1.538	0.00907431	1
Dhfr	4.916	4.37	0.685	0.00919185	1
Golt1b	5.68	5.434	0.844	0.0096859	1
Acox3	3.885	4.896	2.015	0.00983797	1
H4c3	3.079	1.973	0.465	0.0102191	1
Otud6b	4.798	5.291	1.408	0.0102961	1
Cdk9	3.228	4.76	2.893	0.0103412	1
Ly75	9.466	9.181	0.821	0.0104444	1
Jtb	5.452	5.815	1.286	0.0105574	1
Lcp1	8.022	7.45	0.673	0.010743	1
Psmb9	7.772	7.019	0.594	0.0108379	1
Vapa	7.474	7.218	0.838	0.0109268	1
Acsl1	4.371	4.201	0.889	0.0109679	1
Pou2af1	10.177	8.591	0.333	0.0110565	1
Ncaph	4.033	3.371	0.632	0.0115559	1
Tmpo	7.205	6.931	0.827	0.0117897	1
Imp3	7.096	7.41	1.243	0.0117968	1
Lsm3	6.484	6.657	1.127	0.0118952	1
Prdx2	6.91	7.417	1.421	0.0119515	1
Snhg8	7.293	7.734	1.357	0.0120921	1
Cep85	4.531	5.133	1.517	0.012164	1
Wwox	2.053	4.144	4.26	0.0122242	1
Mydgf	4.92	5.963	2.06	0.0124124	1
Ppp2r3a	2.056	2.644	1.503	0.0124835	1
Ppp2r1a	8.358	8.065	0.816	0.0125962	1
Tcea1	5.838	5.377	0.727	0.0129129	1
Dcaf5	4.48	5.674	2.289	0.0135145	1
Rbm15b	5.459	5.884	1.343	0.0139759	1
Tlr12	5.246	6.097	1.804	0.0143191	1
Zfand6	7.043	7.628	1.5	0.0143697	1
Cr2	3.993	2.967	0.491	0.014379	1
Tagap	7.12	8.05	1.906	0.0144165	1
Cd52	8.789	8.512	0.826	0.0145524	1
Grk2	8.585	7.944	0.641	0.014621	1
Ifrd1	6.213	7.028	1.76	0.0146413	1
Rab6a	7.083	6.021	0.479	0.0147302	1
Raph1	3.771	3.21	0.678	0.0149285	1
Dhx8	6.704	6.253	0.732	0.0149522	1
Wrap53	4.06	3.311	0.595	0.0149905	1
Foxn2	4.095	2.686	0.377	0.0152644	1
Grina	7.049	7.529	1.395	0.0152755	1
Lad1	3.762	1.55	0.216	0.0152934	1
Zbtb37	3.333	4.206	1.832	0.015374	1
Actr3	8.613	8.994	1.302	0.0160473	1
Pdhb	6.862	6.568	0.816	0.0166985	1
Lysmd3	4.019	2.818	0.435	0.0169056	1
Pex11b	5.438	4.618	0.566	0.0172902	1
Papolg	4.427	5.268	1.791	0.0173163	1
S100a9	2.984	3.49	1.419	0.0175127	1
Nme3	4.071	2.819	0.42	0.017741	1
Sfi1	3.672	4.771	2.142	0.0177778	1
Pisd	5.386	4.821	0.676	0.0178205	1
Gm24494	2.398	3.069	1.591	0.017974	1
Ykt6	5.904	6.718	1.758	0.0180293	1
Ints13	4.026	5.034	2.011	0.0181934	1
Cabin1	6.16	5.868	0.816	0.0186042	1
Zcchc10	5.308	5.751	1.359	0.019091	1
Nop58	8.393	8.103	0.818	0.0193326	1
Topors	5.302	5.779	1.392	0.0196209	1
Borcs7	4.986	4.826	0.895	0.0196217	1
Isoc1	3.795	3.419	0.77	0.0196484	1
Ccn2	2.479	1.355	0.459	0.0197485	1
Ppm1d	5.198	4.3	0.536	0.0199722	1
Pelp1	5.488	4.945	0.686	0.0199783	1
Zbtb11	4.852	5.482	1.548	0.0201062	1
Atf6b	6.641	6.922	1.215	0.0204721	1
Pofut1	6.88	6.77	0.926	0.0206375	1
Otud1	1.935	2.832	1.862	0.0207279	1
Klf4	3.878	2.468	0.376	0.0210094	1
Fbxo7	3.457	4.335	1.838	0.0211344	1
Thoc1	5.97	5.641	0.796	0.0212104	1
Obi1	4.771	3.138	0.322	0.0214486	1
Lpcat1	7.397	6.705	0.619	0.0214882	1
Slc41a1	3.253	2.573	0.624	0.0214934	1
Slu7	7.53	7.806	1.211	0.0216985	1
Ccdc137	4.766	5.398	1.55	0.022298	1
Arl15	1.562	3.031	2.77	0.0224531	1
Ncapg	5.664	4.821	0.557	0.0225017	1
Mlst8	4.227	5.519	2.449	0.0225235	1
Lrpprc	5.428	6.58	2.222	0.0225471	1
Lrrc42	5.987	5.476	0.702	0.0226265	1
Dnmbp	3.766	2.359	0.377	0.022814	1
Lnpep	4.412	3.164	0.421	0.022873	1
Bloc1s1	2.781	3.638	1.81	0.0229675	1
Cenatac	5.108	4.169	0.522	0.0230286	1
Sav1	5.099	4.091	0.497	0.0230942	1
Ctnnbip1	5.273	6.455	2.27	0.0231349	1
Ehd1	7.318	7.401	1.059	0.023275	1
Cntln	3.041	4.018	1.968	0.0233047	1
Adap1	5.552	5.997	1.361	0.0235491	1
Zrsr2-ps1	3.844	4.809	1.953	0.0237268	1
Phb	5.141	4.422	0.608	0.0240496	1
Kansl3	5.824	6.298	1.39	0.0241951	1
Emc8	5.25	3.992	0.418	0.0247713	1
Flcn	5.537	5.837	1.231	0.0247995	1
Plod3	3.363	4.362	1.998	0.0248179	1
Eif2b3	5.428	4.9	0.694	0.0248776	1
Fibp	5.074	4.388	0.622	0.0250389	1
Cnn2	7.071	6.196	0.546	0.0250728	1
Smim8	4.741	3.823	0.529	0.0251193	1
Fam13b	5.76	6.209	1.366	0.0252497	1
Cdc14a	3.768	3.265	0.705	0.0255813	1
Txnip	8.323	7.85	0.721	0.0258284	1
Fcgr2b	2.208	3.991	3.442	0.0260432	1
Riox1	3.888	5.482	3.018	0.0263057	1
Sfxn4	2.407	3.487	2.114	0.0264805	1
Zfp157	3.809	4.444	1.554	0.0265645	1
Snrpd1	6.924	7.411	1.401	0.0266242	1
Gm39467	1.714	3.664	3.864	0.0266603	1
Ppa2	3.54	4.218	1.601	0.0266951	1
Rcl1	6.722	7.086	1.287	0.0267487	1
Zfp369	3.836	4.544	1.633	0.0269699	1
Il11ra1	1.539	2.391	1.806	0.027367	1
Septin7	7.958	7.662	0.815	0.0274029	1
Nsmce4a	4.902	5.762	1.816	0.0277814	1
Erlec1	6.627	5.07	0.34	0.0278278	1
Nbn	4.831	4.036	0.576	0.0278373	1
Eml5	3.165	4.147	1.975	0.0278788	1
Cenpv	4.282	4.002	0.824	0.0280146	1
Rraga	5.133	7.146	4.037	0.0281399	1
Mast2	3.818	4.577	1.692	0.0281402	1
Rubcnl	2.02	4.034	4.038	0.0282207	1
Tnpo3	6.831	7.499	1.589	0.028297	1
Cep170b	3.052	4.66	3.05	0.0283095	1
Atxn1	4.555	4.99	1.352	0.0284082	1
Srsf1	7.167	7.451	1.217	0.0284371	1
Hnrnpa2b1	8.318	8.054	0.833	0.028441	1
Zfp51	4.003	2.27	0.301	0.0290375	1
Sucla2	6.006	5.353	0.636	0.0290598	1
Ak6	6.566	6.238	0.797	0.0294375	1
LOC118568353	3.459	1.746	0.305	0.0294868	1
Sft2d2	9.177	8.941	0.849	0.0295291	1
Basp1	8.351	7.527	0.565	0.0298207	1
Plekho1	8.699	7.89	0.571	0.0300739	1
Tfeb	5.438	5.08	0.78	0.030102	1
Senp6	7.484	7.114	0.774	0.0301089	1
Zbed6	4.476	5.776	2.462	0.0302134	1
Snx5	8.196	8.316	1.087	0.0303239	1
LOC115488671	2.229	3.402	2.255	0.0303291	1
Cbx3	6.385	5.518	0.548	0.0305632	1
Pyurf	4.591	4.251	0.79	0.0306994	1
Fndc3a	5.308	4.599	0.612	0.0308863	1
Unc93b1	8.043	7.143	0.536	0.0309672	1
Pdcd7	5.526	4.16	0.388	0.0312299	1
Chmp7	5.598	4.707	0.539	0.0313868	1
Psma7	8.391	8.724	1.26	0.0316484	1
Sptan1	6.213	6.525	1.241	0.0316998	1
Brk1	6.649	7.266	1.533	0.0319963	1
Capzb	8.211	8.473	1.199	0.0320648	1
Acsf3	2.623	3.727	2.149	0.0320791	1
Arid1b	6.228	5.148	0.473	0.0321258	1
Ift46	5.55	5.075	0.72	0.0323985	1
Tmem176b	9.347	9.532	1.137	0.0324773	1
Ppp4r2	6.813	6.961	1.108	0.0325128	1
Lgals8	5.213	5.692	1.393	0.0326921	1
Otud5	6.675	6.393	0.822	0.0328697	1
Faap24	4.675	3.737	0.522	0.0330003	1
Ssr1	6.711	6.404	0.808	0.0333491	1
Gpn3	3.004	3.668	1.585	0.0335824	1
Irf8	9.7	9.123	0.67	0.0336087	1
Fabp5	3.926	4.415	1.404	0.0339591	1
Stk38	6.652	6.792	1.102	0.0340495	1
Invs	2.233	3.443	2.314	0.0341155	1
Cd79a	4.185	2.762	0.373	0.0341191	1
Mast3	4.363	3.373	0.503	0.0341342	1
Zfp955b	3.549	3	0.683	0.0343826	1
Cyp4f16	3.112	2.077	0.488	0.0343972	1
Pgap2	5.214	4.455	0.591	0.0344074	1
Zfp148	5.967	6.351	1.305	0.0346164	1
Vmp1	8.194	7.776	0.749	0.034767	1
Zfp120	3.914	4.709	1.735	0.0349557	1
Gm10157	3.843	3.638	0.867	0.0350528	1
Cxxc5	3.277	1.678	0.33	0.0352568	1
Bcl3	5.848	5.05	0.575	0.0352791	1
Flt3	2.556	1.258	0.407	0.0356483	1
Ddx10	7.364	7.893	1.443	0.035888	1
Myl6b	3.39	3.007	0.767	0.0359827	1
Mpzl2	5.273	2.881	0.191	0.0361605	1
Abcb10	4.588	2.939	0.319	0.0362942	1
Spata2	4.086	5.569	2.795	0.036522	1
Kctd11	1.248	3.478	4.691	0.0365485	1
Cnnm4	2.855	1.474	0.384	0.0366906	1
Itpr2	6.904	6.374	0.693	0.0368687	1
Nbeal1	4.346	5.411	2.091	0.0371511	1
Tmem14a	2.289	3.763	2.777	0.0372287	1
Trim11	5.008	5.522	1.428	0.0372838	1
Zfp317	5.318	4.084	0.425	0.0373417	1
Spib	7.233	6.06	0.444	0.0373561	1
H2-DMa	9.779	9.092	0.621	0.0373676	1
Nomo1	6.223	5.458	0.589	0.037682	1
Timm21	3.857	3.288	0.674	0.0379861	1
Rpusd4	4.226	4.792	1.48	0.0379932	1
Stim1	4.998	4.116	0.543	0.0380423	1
Slc37a3	3.671	2.004	0.315	0.0381009	1
Pigu	4.478	3.71	0.587	0.0381181	1
Serinc5	4.257	2.378	0.272	0.0382946	1
Utp25	5.037	5.779	1.673	0.0385493	1
Dusp2	4.834	3.391	0.368	0.038569	1
Soat2	3.467	4.266	1.74	0.0386769	1
Ighg1	8.236	7.94	0.814	0.0386774	1
Stoml1	5.773	5.07	0.614	0.0387708	1
Pacsin1	8.134	7.87	0.833	0.0387776	1
Ptges3-ps	3.784	3.161	0.649	0.0388663	1
Kbtbd4	3.773	3.364	0.753	0.0389362	1
Klf2	5.316	3.985	0.398	0.0391826	1
Vegfa	7.306	6.977	0.796	0.0392919	1
Osbpl9	6.277	6.09	0.878	0.0394213	1
Snx18	4.932	4.18	0.594	0.0394501	1
Dctn4	6.245	6.619	1.296	0.0396519	1
Rps2	10.117	10.392	1.21	0.0397369	1
Tcf4	7.913	8.141	1.171	0.0398645	1
Dhrs1	5.106	5.01	0.936	0.0400134	1
Ndufs4	6.811	6.152	0.633	0.0400788	1
Mcts1	5.429	6.062	1.551	0.0406343	1
Gnas	9.869	9.563	0.809	0.0407278	1
Zswim4	5.719	4.571	0.451	0.0407338	1
Arfip2	5.191	4.4	0.578	0.0408115	1
Rtn4	7.278	7.413	1.098	0.04086	1
Arhgef6	7.165	6.927	0.848	0.0410055	1
Ssr3	6.566	7.154	1.504	0.0412445	1
Fas	6.515	6.011	0.705	0.0413408	1
Gm4961	2.502	1.636	0.549	0.0415749	1
Snora73b	2.982	1.19	0.289	0.0416803	1
Ncoa1	5.69	5.369	0.801	0.0417395	1
Mindy1	5.748	5.491	0.837	0.041939	1
Gm3325	4.495	3.707	0.579	0.0422323	1
Gng12	5.947	5.59	0.781	0.0423352	1
Cerk	6.822	6.074	0.595	0.0426733	1
Pcbp2	9.269	9.443	1.129	0.0428747	1
Dmtf1	5.601	5.059	0.687	0.0431052	1
Pgap6	2.187	3.792	3.04	0.0431235	1
Tubb2a	3.394	5.396	4.006	0.0431829	1
Igsf8	5.066	4.98	0.942	0.0432935	1
Gm46371	3.457	4.653	2.292	0.0433476	1
C2cd2l	3.9	2.032	0.274	0.0435436	1
Cdkal1	4.614	5.985	2.586	0.0439276	1
Ehbp1l1	5.676	6.587	1.88	0.0439457	1
Haghl	2.715	1.465	0.42	0.0440336	1
Fam120aos	2.89	2.424	0.724	0.0441593	1
Noc2l	6.798	6.324	0.72	0.0441613	1
Dnajc13	5.862	5.04	0.566	0.044314	1
Ing4	4.716	5.513	1.737	0.0445631	1
Dusp22	3.394	4.406	2.017	0.0446245	1
Mir155hg	2.051	4.719	6.354	0.0446858	1
Usp16	6.585	6.324	0.835	0.0447298	1
Spen	7.584	7.121	0.725	0.0447511	1
Tarbp2	2.007	2.688	1.602	0.0447743	1
Specc1l	5.488	4.438	0.483	0.0448086	1
Hspb1	2.886	3.902	2.022	0.044892	1
Snx8	7.854	7.51	0.788	0.0449793	1
Sh3bgrl	4.94	4.561	0.769	0.0452602	1
Mettl9	3.33	4.592	2.399	0.0453021	1
Sirt3	2.312	3.26	1.929	0.0453966	1
Gnpnat1	6.789	7.203	1.333	0.0455858	1
Anxa4	3.275	4.933	3.158	0.0458905	1
Twsg1	5.559	4.781	0.583	0.0459588	1
Rnf170	3.583	2.859	0.605	0.0461481	1
Zfp280c	3.146	4.049	1.87	0.0462789	1
Slc2a6	6.056	4.809	0.421	0.0463093	1
Tmem165	5.409	4.165	0.422	0.046858	1
Zbtb6	3.288	4.615	2.51	0.0472934	1
Zfp780b	3.685	2.202	0.358	0.0474134	1
Cs	7.268	7.442	1.129	0.0474574	1
Bcl2l1	6.202	6.539	1.263	0.0475315	1
Thap12	6.432	6.04	0.762	0.0475648	1
Pnisr	7.691	8.135	1.361	0.0478472	1
Cers2	7.982	7.544	0.738	0.0482093	1
Erg28	8.206	8.773	1.482	0.0483206	1
Ighe	4.829	3.877	0.517	0.0484201	1
Zfp609	4.782	3.996	0.58	0.0484398	1
Ndufs6	6.298	6.656	1.282	0.048619	1
Pik3r6	2.058	2.706	1.567	0.0486394	1
Cpsf3	6.626	5.898	0.604	0.0487635	1
Eef2k	4.01	2.897	0.462	0.0488181	1
Fem1c	2.755	1.544	0.432	0.0488841	1
Mcm4	5.78	4.891	0.54	0.0489642	1
Mtrfr	2.816	4.098	2.432	0.0490406	1
Sf3a3	4.347	4.968	1.537	0.0490809	1
Usp2	7.011	6.561	0.732	0.0494114	1
Wdr48	5.685	5.098	0.666	0.049524	1
Raf1	5.65	6.206	1.47	0.0496993	1
Tent5c	5.902	6.914	2.017	0.0497378	1
Dpysl2	5.019	5.569	1.464	0.0502196	1
Dtl	4.287	2.614	0.314	0.0502721	1
Ube2g2	7.392	7.808	1.334	0.0504149	1
Prpf40a	8.628	8.426	0.869	0.0504586	1
Stx8	5.553	6.185	1.549	0.0504691	1
Akap11	4.823	5.272	1.365	0.0505259	1
Marchf2	5.122	5.043	0.946	0.0505324	1
Casd1	3.381	4.849	2.766	0.0505345	1
Ssr2	7.105	6.709	0.76	0.0506055	1
Nsa2	6.984	6.524	0.727	0.050628	1
Klhl5	5.754	4.972	0.582	0.0509771	1
Tlr2	1.362	3.545	4.542	0.0513524	1
Mtmr2	3.966	5.026	2.085	0.0519356	1
Larp1	8.902	8.552	0.785	0.0521764	1
Itpr1	4.726	5.776	2.071	0.0523165	1
Tor1a	4.765	5.68	1.886	0.0524958	1
Nupr1	7.829	8.485	1.576	0.0526607	1
Igbp1	4.261	5.171	1.88	0.0527338	1
Lmo7	4.901	2.66	0.212	0.0528346	1
Zfp551	3.386	1.858	0.347	0.0529108	1
Psmb2	6.213	6.482	1.205	0.0529897	1
Ubl3	6.921	6.244	0.626	0.053275	1
Clip3	2.318	1.536	0.582	0.0533517	1
Nme7	4.038	3.23	0.571	0.0533773	1
Zfp638	5.923	6.414	1.406	0.0535683	1
Ctc1	4.276	3.711	0.676	0.0536989	1
Dtwd1	4.439	5.442	2.005	0.0537054	1
Ptpn18	7.434	6.711	0.606	0.0537324	1
Nnt	4.806	4.086	0.607	0.0537814	1
Lrrfip2	6.16	5.826	0.794	0.053793	1
Kat14	2.928	3.557	1.547	0.0540465	1
Surf1	4.738	3.981	0.592	0.054199	1
Uchl1	5.773	7.061	2.443	0.0544668	1
Nfkbib	7.61	7.423	0.878	0.0546014	1
Cdc42	9.448	9.789	1.266	0.0547271	1
Arf1	8.09	8.226	1.098	0.055075	1
Kif4	5.129	3.812	0.401	0.0551938	1
Ice1	5.648	6.32	1.593	0.0552054	1
Nudt6	2.08	3.266	2.275	0.0554374	1
Pkp3	6	6.602	1.518	0.0555162	1
Zdhhc6	4.476	2.983	0.355	0.0555647	1
Oit3	4.884	3.397	0.357	0.0555819	1
Degs1	6.771	6.522	0.841	0.0557795	1
Gm30149	1.666	3.132	2.763	0.0558528	1
Klhdc1	3.024	1.404	0.325	0.0559426	1
Zfp706	7.412	7.075	0.792	0.0561561	1
Atp6ap2	6.028	7.393	2.576	0.0561682	1
Desi2	5.873	5.615	0.836	0.0565231	1
Atf3	4.563	5.74	2.261	0.056539	1
Mcu	6.697	6.207	0.712	0.0566952	1
Rab11fip2	3.734	4.221	1.402	0.0567842	1
5430403G16Rik	2.185	3.799	3.06	0.056942	1
Cryzl2	2.408	4.136	3.313	0.0570201	1
Prpf38a	4.701	5.598	1.862	0.0570864	1
Tpm1	5.884	6.269	1.306	0.0573718	1
Cep120	4.188	5.667	2.787	0.0573819	1
Akap12	4.861	6.119	2.393	0.0574023	1
Pspc1	5.55	4.226	0.399	0.0574152	1
Rdh14	4.051	3.535	0.699	0.0575477	1
Nt5c3b	3.167	4.451	2.435	0.0575833	1
Tmem60	4.556	3.026	0.346	0.0576149	1
Alyref2	1.2	3.171	3.92	0.0578468	1
Cdip1	4.858	5.619	1.695	0.0583471	1
Puf60	6.849	7.383	1.448	0.0585532	1
Ptpn14	3.129	4.076	1.928	0.0585623	1
Alpl	5.609	3.583	0.245	0.0586031	1
Fdps	4.046	4.551	1.419	0.0586274	1
Syncrip	7.889	7.488	0.757	0.0592895	1
Ezh1	5	5.343	1.268	0.0592987	1
Tcn2	2.692	3.508	1.761	0.0594749	1
Slc35f5	2.5	4.148	3.133	0.0595825	1
Mxd4	6.62	6.841	1.166	0.0596202	1
Smyd3	3.214	4.723	2.846	0.0596388	1
Fbxo32	4.369	3.357	0.496	0.0596564	1
Ubc	10.041	9.869	0.887	0.0597335	1
Ppp1r10	6.336	6.604	1.204	0.0597537	1
Klc1	7.832	8.456	1.542	0.0597721	1
Kansl2	1.462	3.358	3.723	0.0599022	1
Idh3b	6.381	5.404	0.508	0.0599546	1
Pcnx3	6.978	6.573	0.755	0.0599795	1
Rfxank	4.503	3.85	0.636	0.0600425	1
Cyb5a	5.062	4.543	0.698	0.0601256	1
Eif2s3x	4.879	6.042	2.241	0.060362	1
Mroh1	3.871	4.576	1.63	0.0604308	1
Blvra	4.876	3.982	0.538	0.0606067	1
Sox4	7.665	8.995	2.514	0.0607011	1
Cenpf	7.013	6.575	0.738	0.0607837	1
Acot13	6.229	5.859	0.774	0.0610084	1
Mdm1	1.599	2.674	2.107	0.0610294	1
Dcps	5.881	6.115	1.176	0.0610758	1
Eml2	6.472	5.875	0.661	0.0612698	1
Usp24	5.321	4.517	0.573	0.0612966	1
Eif4ebp1	8.722	8.899	1.131	0.0613489	1
Yaf2	5.441	4.698	0.597	0.0615539	1
Abhd4	5.73	5.896	1.121	0.0617079	1
Tinf2	3.462	4.291	1.777	0.0617093	1
Sos2	4.409	4.981	1.487	0.0617893	1
Ppfibp1	1.381	3.77	5.238	0.061949	1
Hdhd2	4.711	4.122	0.664	0.0622408	1
Itsn1	4.987	5.914	1.901	0.0622677	1
Nudt5	4.991	3.99	0.5	0.0622913	1
Cab39l	4.949	5.646	1.621	0.0622985	1
Emd	6.137	6.769	1.549	0.062311	1
Snrnp70	9.077	9.474	1.317	0.0623932	1
Csnk2a2	7.667	7.167	0.707	0.0624592	1
Spr	5.171	5.976	1.746	0.0624981	1
Tyw5	3.822	2.619	0.435	0.0625463	1
Slco4a1	5.424	6.041	1.534	0.0630709	1
Cox6b1	7.279	7.728	1.365	0.0632482	1
Disp1	4.042	2.462	0.335	0.0634372	1
Snx13	4.635	3.463	0.444	0.0636234	1
Lims1	5.824	5.41	0.751	0.0639152	1
Gm42351	1.318	3.823	5.674	0.0639459	1
Gnai2	9.81	9.658	0.9	0.0639605	1
Ilvbl	5.822	5.412	0.752	0.0640306	1
Ttc17	4.942	5.189	1.187	0.0641681	1
Golga7	4.203	3.32	0.542	0.0642171	1
Cluap1	4.149	4.914	1.7	0.0642418	1
Napsa	7.477	6.731	0.596	0.0644192	1
Hsp90b1	9.282	8.86	0.746	0.0645933	1
Fam53c	4.379	5.23	1.803	0.0646886	1
Gm20139	3.527	3.445	0.944	0.0647666	1
Rps12	11.494	11.874	1.301	0.0652679	1
Zc3hav1	7.968	7.801	0.891	0.0654142	1
S100pbp	7.113	6.99	0.918	0.0656436	1
Ms4a1	9.689	8.731	0.515	0.0657984	1
Mettl21a	3.003	3.738	1.664	0.0658486	1
Acly	6.167	5.769	0.759	0.0659378	1
Selenon	1.886	3.238	2.551	0.0659793	1
Nfxl1	5.849	5.711	0.909	0.0660371	1
Srrd	3.923	3.478	0.735	0.066048	1
Setd6	4.269	2.705	0.338	0.0660577	1
Pigv	3.996	3.019	0.508	0.0665418	1
Psat1	8.238	8.663	1.342	0.0667994	1
Rnf126	5.611	5.202	0.753	0.0668106	1
Rbsn	4.752	3.566	0.44	0.066923	1
Pex14	3.998	4.885	1.849	0.0669887	1
Tgds	2.624	2.967	1.268	0.067107	1
Afdn	1.292	3.746	5.48	0.0674611	1
Zscan12	2.541	4.391	3.605	0.0675096	1
Dennd4a	6.836	7.113	1.212	0.0679503	1
Gimap9	5.208	5.826	1.535	0.0680332	1
Ppp1r12c	6.202	6.692	1.404	0.0683911	1
Ark2n	3.787	2.976	0.57	0.0684457	1
Itgb2	5.069	4.656	0.751	0.0684829	1
Treml2	6.324	5.438	0.541	0.0685016	1
Asb6	4.475	3.793	0.623	0.0685109	1
Lig3	3.995	4.305	1.24	0.0687624	1
Smim13	2.741	4.427	3.218	0.0689814	1
Ttc27	4.347	3.587	0.59	0.0690505	1
Gm26316	1.603	3.026	2.68	0.0690509	1
Sphk2	5.8	6.463	1.584	0.0690639	1
Usp1	7.194	6.905	0.818	0.0690872	1
Zfp768	4.31	5.195	1.847	0.0692579	1
Tmem238	4.328	2.185	0.226	0.0693437	1
Camk1	1.272	2.569	2.457	0.0694133	1
Atp6v1g1	7.093	7.439	1.271	0.069799	1
L3mbtl2	5.542	4.664	0.544	0.0700239	1
Zfp942	4.099	2.429	0.314	0.0702724	1
Optn	4.057	5.045	1.985	0.0702999	1
Gm3219	3.74	3.232	0.703	0.0704281	1
Tbcd	5.864	4.961	0.535	0.0704748	1
Eid2b	3.485	1.793	0.309	0.0706142	1
C920009B18Rik	3.454	4.793	2.529	0.0706373	1
Rab24	6.765	7.224	1.375	0.0707977	1
Satb1	8.948	8.663	0.821	0.0708605	1
Rftn2	3.635	4.281	1.565	0.0708608	1
Ppia	6.094	6.452	1.281	0.0712751	1
Ahi1	4.208	4.677	1.384	0.0712866	1
Diaph1	5.692	5.406	0.82	0.0713639	1
Osgin2	5.156	4.363	0.577	0.0713961	1
Ect2	3.31	2.438	0.546	0.0714663	1
Prrc2a	7.275	6.339	0.522	0.0715704	1
Ly6e	9.311	8.816	0.71	0.0716604	1
Lime1	4.984	4.625	0.78	0.0716976	1
Ncstn	5.207	4.646	0.678	0.0717641	1
Ndrg2	2.678	3.616	1.917	0.0717897	1
Zcchc8	5.889	5.103	0.58	0.0718474	1
Triap1	5.634	6.475	1.791	0.0718661	1
Zfas1	9.059	9.782	1.65	0.0718778	1
Marchf7	6.959	6.802	0.897	0.0718834	1
Mrpl9	1.531	3.182	3.141	0.0718979	1
Mcm2	7.663	7.4	0.833	0.0719965	1
Cebpd	3.526	2.347	0.442	0.0720652	1
Slc37a4	2.586	3.692	2.152	0.0722397	1
Cibar1	3.547	2.349	0.436	0.0725488	1
Get1	2.456	3.938	2.792	0.0725974	1
Gatad2b	7.615	7.429	0.879	0.0727387	1
Hadh	5.046	5.314	1.204	0.0727691	1
Gng2	4.962	3.486	0.359	0.0728659	1
Tbc1d31	5.849	5.007	0.558	0.07321	1
Smc4	8.93	8.378	0.682	0.0732772	1
Tnks2	6.625	7.18	1.47	0.0733822	1
Chmp3	6.046	6.637	1.506	0.073607	1
Xk	2.522	1.535	0.504	0.0741689	1
Gm4285	2.984	1.159	0.282	0.0743153	1
Vav1	5.926	6.43	1.418	0.0743774	1
Zfp110	4.548	5.784	2.356	0.074722	1
Cbx4	7.969	7.432	0.689	0.0749505	1
Nup58	4.604	5.327	1.651	0.07496	1
Sbsn	3.53	4.627	2.139	0.0749825	1
Capza1	5.645	4.962	0.623	0.0750376	1
Iglc1	6.36	5.938	0.746	0.0750701	1
Gins1	3.029	1.107	0.264	0.0751331	1
Pafah2	3.722	4.231	1.423	0.075596	1
B230307C23Rik	2.053	3.337	2.435	0.0756069	1
Plin3	6.604	6.174	0.742	0.0757291	1
Mpv17l2	6.39	6.022	0.775	0.0757922	1
Trub2	3.832	5.092	2.395	0.0759192	1
Hipk2	7.675	7.308	0.775	0.0760068	1
Syne3	3.895	2.581	0.402	0.0760691	1
St7l	3.228	1.816	0.376	0.0760777	1
1110002L01Rik	1.924	3.854	3.812	0.076223	1
Atp6v0b	8.445	8.883	1.355	0.0765706	1
Ilrun	6.89	7	1.079	0.0768442	1
Epc2	6.98	6.352	0.647	0.0769432	1
Itpkb	6.267	6.887	1.537	0.0770409	1
Nfkb2	9.207	9.074	0.912	0.0776726	1
Lmbrd2	5.373	3.373	0.25	0.0778177	1
Elac1	3.7	2.804	0.538	0.077855	1
Ung	4.739	5.761	2.031	0.0778748	1
Psmd5	6.193	6.539	1.271	0.0780395	1
Cnih1	6.199	6.665	1.382	0.0780537	1
Cd22	5.846	5.137	0.612	0.0783213	1
Mettl8	2.103	3.39	2.44	0.078404	1
Atp6v1f	8.904	9.41	1.42	0.0784285	1
Mff	5.534	6.128	1.509	0.0784678	1
Gm7072	4.367	3.172	0.437	0.0785164	1
Gm51897	1.529	3.407	3.674	0.0787077	1
Rbm5	6.523	7.128	1.521	0.0788319	1
Tmem123	10.647	9.978	0.629	0.0788541	1
Lemd3	3.567	4.372	1.748	0.078944	1
Ckap4	6.705	7.194	1.403	0.0790406	1
Qki	6.223	5.589	0.644	0.0791623	1
Nudt16l1	6.786	7.567	1.718	0.0792282	1
Tmem98	2.137	4.179	4.118	0.0792295	1
Rpa3	4.626	3.471	0.449	0.0792305	1
Nectin1	3.208	4.326	2.169	0.0793452	1
Mpv17l	2.113	1.001	0.463	0.0793995	1
Gm26497	2.84	1.08	0.295	0.0796313	1
Elk1	3.472	5.124	3.141	0.0796921	1
Tpst2	5.374	3.927	0.367	0.0797323	1
Ube2m	5.88	6.29	1.329	0.0798014	1
Wnk1	8.705	8.113	0.663	0.0799755	1
Rnf31	3.917	3.378	0.688	0.080049	1
Tex264	6.151	6.328	1.13	0.0801846	1
Rab5c	7.504	6.975	0.693	0.0805041	1
Smad1	2.693	3.672	1.971	0.0806377	1
Bcas3	4.678	5.271	1.509	0.0806627	1
Ago1	4.494	3.282	0.432	0.0807077	1
Gm12655	2.967	1.024	0.26	0.0807828	1
Cab39	5.488	6.324	1.786	0.0810483	1
Creld1	1.829	3.191	2.57	0.0810955	1
Spa17	2.503	1.254	0.421	0.0811277	1
Atp5g2	3.075	1.761	0.402	0.0814257	1
Map4k1	8.018	7.519	0.707	0.0815828	1
Map2k3	4.767	5.666	1.865	0.0816717	1
Ppp4r3b	7.968	7.73	0.848	0.0818249	1
Kat6b	4.36	4.739	1.301	0.081949	1
Ppih	5.377	4.607	0.587	0.0821218	1
Ppp4r3a	6.109	5.662	0.734	0.0823192	1
Apobec3	8.368	7.831	0.689	0.0824966	1
Fmnl2	2.496	3.231	1.665	0.0827004	1
Bcl11a	7.58	6.984	0.661	0.0827067	1
Mthfsd	3.776	3.15	0.648	0.0827662	1
Homer2	2.643	2.503	0.908	0.082945	1
Knop1	5.727	6.036	1.239	0.0830019	1
Itgb1bp1	6.635	5.945	0.62	0.0830929	1
Foxn3	8.243	8.078	0.892	0.0833816	1
Rfc4	5.053	3.639	0.375	0.0834155	1
Arl16	5.111	5.953	1.793	0.083489	1
Cenpo	4.324	3.095	0.427	0.0835031	1
Plagl2	7.532	6.913	0.651	0.0837294	1
Tnfrsf13c	5.273	4.332	0.521	0.084054	1
Tex261	7.217	7.636	1.337	0.0840859	1
Vps72	4.152	3.444	0.612	0.0841077	1
Metap2	7.298	8.122	1.77	0.0844719	1
Mob3a	5.424	5.751	1.254	0.0845368	1
Gm24924	1.567	2.926	2.565	0.0849036	1
Rcor1	6.335	5.618	0.608	0.0853798	1
Nup35	3.736	1.282	0.183	0.0853835	1
Gnaz	6.614	5.215	0.379	0.0853972	1
Nras	7.573	8.067	1.408	0.0854213	1
Slc49a4	3.466	1.302	0.223	0.0855241	1
Bhlha15	3.099	1.107	0.251	0.0857073	1
Ctsd	6.84	7.227	1.307	0.0858965	1
Asb13	3.051	2.286	0.589	0.0860517	1
Csrnp1	4.915	5.291	1.298	0.0862438	1
Cmc1	5.128	4.59	0.688	0.0866362	1
Mrfap1	8.049	7.883	0.891	0.0866527	1
Atp5d	8.003	7.689	0.804	0.0866801	1
Rpl35a	7.744	7.071	0.627	0.086794	1
Katnb1	4.136	3.204	0.524	0.0868499	1
Gm31328	1.88	1.927	1.033	0.0871069	1
Cfp	5.28	4.187	0.469	0.0871617	1
Alg1	4.86	5.637	1.713	0.0872694	1
Limd1	7.257	6.49	0.587	0.0872734	1
Pnpla6	3.035	3.585	1.464	0.0874093	1
Nfil3	7.88	7.506	0.772	0.0874773	1
Limk2	5.231	5.724	1.407	0.0875155	1
Uba6	4.17	3.118	0.482	0.087547	1
Arhgap4	3.182	4.338	2.228	0.0875988	1
Prpf3	5.964	5.496	0.723	0.087615	1
Cnppd1	9.696	9.893	1.146	0.0876591	1
Havcr1	3.853	4.89	2.052	0.087672	1
Tmbim6	7.894	7.284	0.655	0.0880509	1
Creb3	5.149	5.747	1.515	0.0881506	1
Rpsa	10.65	10.718	1.048	0.0884209	1
Notch2	4.921	4.414	0.704	0.0884316	1
Dpagt1	3.969	5.074	2.151	0.0884454	1
Zkscan8	2.152	3.629	2.782	0.0886366	1
Prpf8	7.157	6.61	0.684	0.0887601	1
Sec61g	1.852	3.357	2.84	0.0889806	1
Setd4	2.881	1.546	0.397	0.0890143	1
Msh2	5.913	5.509	0.756	0.0891357	1
Gys1	6.597	7.108	1.425	0.0892315	1
Wdr47	1.713	2.474	1.694	0.0894134	1
Rbbp4	7.672	8.324	1.571	0.0894781	1
Itpr3	3.841	2.61	0.426	0.0896451	1
Actb	12.968	12.696	0.828	0.0897832	1
Lmna	3.273	1.569	0.307	0.0897866	1
Fosb	2.639	1.902	0.6	0.0898379	1
Dna2	1.504	3.931	5.376	0.0898648	1
Rapgef1	9.659	9.05	0.656	0.0899047	1
Taf15	7.547	7.769	1.166	0.0899206	1
Tbc1d30	3.159	4.447	2.442	0.0900923	1
Siah2	6.708	6.071	0.643	0.0901211	1
Galk2	5.349	6.296	1.928	0.0901224	1
Ptar1	3.813	4.646	1.782	0.0903604	1
Ascc1	4.871	4.398	0.72	0.0904002	1
Cyb5r1	7.515	8.552	2.052	0.0904418	1
Dcdc2b	1.202	1.479	1.212	0.0907477	1
Bri3bp	6.546	6.346	0.87	0.0907654	1
Irag2	4.267	5.401	2.195	0.0907708	1
Pole3	5.387	5.767	1.302	0.0908319	1
Mtor	4.019	4.462	1.359	0.0909368	1
Lmnb1	7.854	7.11	0.597	0.0909722	1
Heatr6	5.601	5.079	0.696	0.0911354	1
Eif4g1	8.155	8.041	0.924	0.0912107	1
Taf7	5.101	3.888	0.431	0.0912169	1
Marcksl1	7.351	7.487	1.099	0.0913916	1
Rbm3os	2.78	1.107	0.314	0.0915266	1
Cdca4	7.342	7.241	0.932	0.0920502	1
Serpinb6b	4.595	3.456	0.454	0.0922054	1
Plod2	2.016	3.112	2.139	0.0923022	1
Lasp1	6.302	6.746	1.36	0.0923592	1
Ttll12	5.011	4.535	0.719	0.0924693	1
Usf2	7.678	8.709	2.043	0.0927971	1
Psmg2	6.447	7.056	1.524	0.0929162	1
Dcbld2	1.715	3.263	2.924	0.0929791	1
Senp2	6.439	5.832	0.656	0.093073	1
Psmd8	9.953	10.422	1.384	0.0931515	1
Gatd3a	5.645	4.958	0.621	0.0933391	1
Rabl2	3.599	3.138	0.727	0.0934025	1
Xpc	3.009	4.299	2.445	0.0936228	1
Scamp4	6.509	5.872	0.643	0.0937872	1
Pop5	5.87	5.268	0.659	0.093853	1
H2-Ab1	10.673	9.778	0.538	0.0938819	1
Hilpda	3.916	5.029	2.162	0.0939788	1
Btk	4.76	5.606	1.798	0.0940121	1
Ank	4.024	4.523	1.414	0.0941058	1
Znfx1	4.968	4.184	0.581	0.0945514	1
Larp4	6.206	5.978	0.854	0.0945915	1
Ppp1r12b	1.694	3.668	3.928	0.0946404	1
Maip1	5.102	4.214	0.54	0.0948465	1
Mpzl3	3.807	1.869	0.261	0.0948513	1
Spindoc	3.402	4.397	1.992	0.0949248	1
Cox7a2l	7.947	8.352	1.324	0.0949315	1
Uba7	4.192	4.908	1.643	0.0951585	1
Nipsnap1	3.806	5.195	2.62	0.0955086	1
Gm46914	1.819	3.208	2.619	0.0955677	1
Cxcr4	6.038	6.795	1.69	0.0956542	1
Zfp954	4.855	6.12	2.404	0.0957544	1
Nop10	7.09	6.513	0.67	0.0958337	1
Arhgap9	6.178	5.272	0.534	0.0958397	1
Pitpnb	5.461	5.327	0.911	0.095852	1
Klhdc2	7.762	7.18	0.668	0.095864	1
Ndst2	4.702	3.73	0.51	0.0959054	1
AU040320	6.073	6.91	1.786	0.0961952	1
Trmt5	4.431	3.088	0.394	0.0962433	1
Brwd1	5.329	6.501	2.253	0.096265	1
Odad1	1.183	1.595	1.331	0.0963604	1
Glt8d1	3.284	3.865	1.496	0.096415	1
Foxp4	6.909	7.165	1.194	0.0965103	1
Ppil3	5.137	5.599	1.377	0.0965454	1
Ndufb6	5.202	5.554	1.277	0.0966453	1
Rps11	8.589	7.998	0.664	0.0967042	1
Zc3h14	6.422	5.57	0.554	0.0967338	1
Diaph2	5.37	5.845	1.39	0.0967351	1
Armc9	3.198	3.851	1.572	0.0967828	1
Zfp568	3.441	4.46	2.027	0.0972354	1
Arpc5l	8.177	8.876	1.623	0.097249	1
Wipf1	5.946	5.249	0.617	0.0976406	1
Paox	3.314	4.477	2.239	0.0978169	1
Eeig1	3.671	3.268	0.756	0.0981405	1
Gcdh	1.932	3.128	2.291	0.0981544	1
Nppa	3.16	2.115	0.484	0.0983592	1
Gm11478	5.019	5.574	1.469	0.0986711	1
Baz1b	7.386	7.963	1.492	0.0987027	1
Dmwd	4.476	3.981	0.71	0.0988358	1
Kmt5b	5.739	6.299	1.475	0.0989171	1
Rac2	9.394	9.199	0.873	0.099016	1
Pim1	10.925	10.632	0.816	0.099111	1
Bdh1	5.123	4.642	0.716	0.0991856	1
Fam118a	4.417	5.002	1.5	0.0997112	1
Cop1	5.475	5.069	0.755	0.0997694	1
Ensa	5.511	4.295	0.431	0.100011	1
Zdhhc18	6.181	5.758	0.746	0.100091	1
Dhx33	5.404	4.747	0.634	0.100198	1
Npc2	8.605	8.885	1.214	0.100258	1
Taco1	3.566	2.139	0.372	0.100313	1
Nrcam	1.023	2.557	2.896	0.100391	1
Eif3i	8.833	8.096	0.6	0.100678	1
Rpl3	10.325	10.672	1.272	0.100749	1
Asap1	6.877	6.437	0.737	0.10094	1
Dek	8.156	7.313	0.557	0.101	1
3110082I17Rik	1.913	3.226	2.484	0.10109	1
Paxip1	4.532	4.125	0.754	0.101174	1
Zmym2	4.357	5.368	2.014	0.101247	1
Tmed5	7.246	6.568	0.625	0.101255	1
Hexa	5.889	6.638	1.681	0.10126	1
Mfng	3.688	4.04	1.276	0.101373	1
Evi2a	4.802	4.344	0.728	0.101586	1
Aaas	5.302	5.748	1.362	0.101646	1
1810062O18Rik	3.408	1.339	0.238	0.101783	1
Ppfia1	6.525	5.661	0.549	0.101978	1
Szt2	4.186	3.325	0.551	0.102045	1
Slc30a6	4.583	4.027	0.68	0.10208	1
Ubap1l	1.02	2.398	2.6	0.102267	1
Nol3	1.01	2.558	2.924	0.102353	1
Ppic	1.892	2.315	1.341	0.102559	1
Psma5	5.407	5.96	1.467	0.1026	1
Patz1	1.948	3.667	3.292	0.102622	1
Rpp25l	4.735	2.91	0.282	0.10286	1
Sgk3	3.064	2.113	0.517	0.103081	1
Nob1	6.282	5.77	0.701	0.103219	1
Ski	3.426	2.451	0.509	0.103338	1
Prr12	4.73	4.24	0.712	0.103393	1
B3glct	1.847	2.889	2.06	0.103455	1
Casp3	7.064	7.549	1.4	0.103519	1
Rtl8b	5.028	3.665	0.389	0.103746	1
Zxdb	3.352	2.366	0.505	0.103957	1
Dhps	4.138	4.725	1.502	0.103984	1
Cyb561a3	6.47	5.435	0.488	0.104141	1
Hnrnpul1	8.137	7.633	0.705	0.104261	1
Gm32275	1.357	3.199	3.587	0.104266	1
Srek1ip1	5.662	6.06	1.318	0.10443	1
Dock9	3.072	2.966	0.93	0.10452	1
Tlr7	5.978	6.373	1.315	0.104528	1
Camk2g	4.258	3.402	0.553	0.104571	1
Son	8.549	8.881	1.259	0.104622	1
Ift88	2.772	3.957	2.273	0.104638	1
Rack1	11.578	11.374	0.868	0.104733	1
Fubp1	6.848	7.15	1.233	0.104748	1
Gm22744	1.524	3.323	3.478	0.104759	1
Lamtor1	7.688	8.077	1.309	0.104847	1
Shcbp1	4.321	2.989	0.397	0.104909	1
Lat2	6.928	7.281	1.277	0.104998	1
Hif1an	5.176	5.457	1.215	0.105157	1
Abcf3	4.104	4.723	1.535	0.1052	1
Arfgap2	4.911	3.696	0.431	0.10522	1
Arhgef1	7.51	7.168	0.789	0.105264	1
Chmp1a	6.146	6.991	1.796	0.105335	1
Rgl2	2.315	3.458	2.209	0.105383	1
Gm52629	3.922	2.821	0.466	0.105462	1
Pdlim7	3.585	4.339	1.686	0.105475	1
Ugdh	3.278	3.801	1.437	0.105534	1
Cln3	3.629	4.791	2.237	0.105685	1
Ascc3	3.827	4.725	1.864	0.105724	1
Traf3ip3	4.73	4.468	0.834	0.106018	1
Zc3h10	5.089	4.441	0.638	0.106219	1
Pex1	3.744	2.207	0.345	0.10645	1
Uros	3.755	2.574	0.441	0.106518	1
Sdc4	7.964	7.442	0.696	0.106889	1
Pltp	1.726	3.649	3.792	0.106909	1
Trappc8	3.794	2.279	0.35	0.107186	1
Tmub2	4.098	4.679	1.495	0.107243	1
Lef1	6.44	5.481	0.514	0.107366	1
Spag7	5.54	6.515	1.966	0.107374	1
Ss18	5.162	6.136	1.965	0.107391	1
Dpy30	5.827	5.612	0.861	0.107543	1
Elk3	1.705	2.844	2.202	0.107574	1
Rsbn1	7.15	7.636	1.4	0.10764	1
Nudt16	5.234	4.229	0.498	0.107827	1
Peli1	6.4	6.058	0.789	0.107863	1
Vpreb3	5.179	2.848	0.199	0.108002	1
Stk19	5.738	6.336	1.513	0.108118	1
Mrtfb	3.92	4.242	1.251	0.108192	1
Ncdn	6.172	6.723	1.465	0.108195	1
Ormdl1	4.924	4.213	0.611	0.108259	1
Cc2d1a	3.463	4.053	1.505	0.108358	1
Lcmt2	2.719	3.356	1.555	0.108363	1
Ccar2	2.012	2.959	1.927	0.108421	1
Gm6654	1.891	1.259	0.645	0.108461	1
Cpt1a	2.538	3.385	1.799	0.108463	1
Pigc	3.084	4.613	2.887	0.108577	1
Tyk2	5.911	5.381	0.693	0.108614	1
Renbp	6.581	6.748	1.122	0.108811	1
Atp6v0a2	4.378	4.852	1.389	0.108919	1
Isca2	5.419	5.031	0.764	0.108981	1
Cetn3	8.324	9.107	1.72	0.10918	1
Ccdc88c	5.824	6.571	1.678	0.109352	1
Gpr19	3.677	4.399	1.649	0.109392	1
Kmt2e	8.379	7.942	0.739	0.109474	1
Tusc2	3.925	5.257	2.518	0.10957	1
Tet1	3.389	1.379	0.248	0.109643	1
Dennd11	3.301	2.11	0.438	0.109757	1
Unc50	4.274	4.724	1.366	0.109865	1
Wdr45b	5.315	5.822	1.421	0.109869	1
Kctd5	4.668	5.483	1.758	0.109886	1
Fkbp1a	7.92	8.414	1.408	0.109982	1
Gm24452	3.482	4.128	1.565	0.110016	1
Snhg1	8.535	9.423	1.85	0.110139	1
Gusb	3.856	4.601	1.675	0.110159	1
Heatr5a	3.877	2.204	0.314	0.110166	1
Rnf40	5.267	5.726	1.374	0.110425	1
Snap47	3.538	5.173	3.106	0.110749	1
Pde1b	4.297	5.316	2.027	0.11079	1
Cdkn1a	7.338	7.83	1.406	0.110944	1
Stx11	4.904	5.753	1.802	0.110978	1
Tubb2b	7.107	8.569	2.754	0.111127	1
Zfp654	3.275	2.547	0.604	0.111235	1
Tmem214	5.326	5.059	0.831	0.11125	1
Pip4k2b	5.936	6.793	1.811	0.111312	1
Lcmt1	4.105	4.799	1.618	0.111396	1
Tmem259	5.91	5.182	0.604	0.111546	1
Cacfd1	4.317	5.142	1.771	0.111549	1
Camk2d	7.919	5.878	0.243	0.112017	1
Susd6	4.822	3.956	0.549	0.112038	1
Mis18a	3.541	3.801	1.198	0.112116	1
Cenpc1	3.638	4.319	1.603	0.11213	1
Dhx57	5.613	4.78	0.561	0.11226	1
Lmtk3	2.221	1.009	0.432	0.112386	1
Haus6	3.52	3.932	1.331	0.112458	1
Eif4ebp3	6.04	5.39	0.637	0.11246	1
Vcpip1	6.235	6.609	1.297	0.113118	1
Gpat4	5.695	6.226	1.445	0.113212	1
Cmtm6	5.424	6.025	1.517	0.113424	1
Zfp275	4.405	5.146	1.671	0.113556	1
Pdia3	7.536	6.863	0.627	0.113857	1
Svip	1.524	3.265	3.343	0.113878	1
Nap1l4	6.983	7.499	1.431	0.113905	1
Rab14	8.7	8.451	0.841	0.113959	1
Gemin5	4.543	3.97	0.672	0.114172	1
Tubb4b	6.021	6.774	1.685	0.114206	1
Akap7	5.003	3.803	0.435	0.114427	1
Naxe	8.019	7.883	0.91	0.114465	1
Nme4	2.895	3.65	1.688	0.114528	1
Snx29	6.789	6.373	0.75	0.114539	1
Yod1	4.463	2.621	0.279	0.114668	1
Chpf	3.156	2.654	0.706	0.114769	1
Zfp180	4.65	4.023	0.647	0.11481	1
Slc25a19	8.444	7.96	0.715	0.114825	1
Ap3m1	5.047	5.556	1.424	0.115002	1
Tbx6	3.384	4.358	1.965	0.115139	1
Arap2	7.471	7.795	1.251	0.115152	1
Cstb	6.974	7.696	1.65	0.115421	1
Slamf6	7.852	7.048	0.573	0.115474	1
Rps16	9.481	9.289	0.876	0.11554	1
Ints6	7.339	6.734	0.658	0.115696	1
Xpnpep3	3.632	4.452	1.766	0.115712	1
Elp5	4.994	5.55	1.471	0.115736	1
Zfp771	6.486	5.832	0.635	0.115787	1
Zfp84	5.371	5.068	0.81	0.115953	1
Sin3b	8.008	8.473	1.381	0.115965	1
Gm53284	2.784	1.53	0.419	0.116497	1
Irf3	4.554	5.056	1.416	0.116507	1
Nherf1	3.767	4.657	1.853	0.116591	1
Ms4a6c	7.973	7.662	0.806	0.116594	1
Cebpz	7.222	6.846	0.77	0.116688	1
Htt	4.53	4.89	1.283	0.116805	1
Ppp1r18	7.156	6.697	0.728	0.116908	1
Emc1	5.726	6.641	1.886	0.117028	1
B4galnt1	7.872	7.28	0.664	0.117162	1
Siva1	4.795	5.466	1.592	0.117353	1
Ptp4a3	7.486	7.081	0.755	0.117441	1
Kras	6.815	6.507	0.808	0.117471	1
Lrrc32	2.313	3.733	2.676	0.11749	1
Gm25663	2.082	4.105	4.062	0.117531	1
Rbbp7	6.625	6.07	0.68	0.117639	1
Dhx36	7.113	6.482	0.646	0.117697	1
Pde3b	3.829	3.087	0.598	0.11772	1
Fads1	3.299	4.191	1.857	0.117732	1
Mvd	5.256	5.012	0.845	0.118155	1
Inpp5k	4.542	4.869	1.254	0.11841	1
Lrrc41	4.936	4.83	0.929	0.118501	1
Gm15772	4.471	3.787	0.622	0.118597	1
Golm2	1.825	2.819	1.992	0.118627	1
Cdk10	3.621	4.162	1.455	0.118886	1
Dbp	4.772	2.827	0.26	0.119063	1
Cox7a1	1.519	2.684	2.242	0.119276	1
Zgpat	4.32	3.131	0.438	0.11932	1
Stau1	5.779	5.256	0.696	0.119389	1
Gfod2	3.562	1.649	0.265	0.119435	1
Birc6	7.614	7.369	0.844	0.119468	1
Etv3	3.582	4.088	1.42	0.119655	1
Pi4kb	3.814	3.159	0.635	0.119656	1
Dync1h1	6.612	7.539	1.9	0.119695	1
Nek3	2.505	1.051	0.365	0.119766	1
Lrrc73	1.506	2.576	2.099	0.119937	1
Psmc5	7.062	7.592	1.445	0.120112	1
Sike1	5.688	5.074	0.653	0.120218	1
Pim3	5.607	6.109	1.415	0.120483	1
Ctu1	2.526	3.347	1.766	0.1205	1
Ikzf1	8.491	8.01	0.716	0.120516	1
Adss	6.31	5.716	0.663	0.120524	1
Hypk	6.886	6.347	0.688	0.12055	1
Rab35	7.462	7.057	0.756	0.120564	1
Noa1	2.68	3.316	1.554	0.120644	1
Fam234a	3.673	4.109	1.353	0.12076	1
Gfi1	4.395	3.703	0.619	0.120781	1
Cdon	3.478	4.312	1.782	0.121166	1
Calhm2	2.988	1.876	0.463	0.121182	1
Asl	3.18	4.122	1.921	0.121423	1
Ggta1	3.685	4.419	1.662	0.121556	1
Plin2	3.047	3.882	1.784	0.121632	1
H2-Aa	10.937	10.456	0.716	0.121649	1
Hspa4	7.543	7.968	1.342	0.121729	1
Tuba1a	5.781	6.754	1.963	0.121948	1
Tango6	4.023	2.941	0.473	0.121959	1
Gm52702	3.247	3.454	1.154	0.122012	1
Hsd3b7	1.076	2.519	2.718	0.122198	1
Fth1	10.123	9.591	0.691	0.122366	1
Asb3	4.916	5.462	1.46	0.122455	1
Ext1	1.555	3.71	4.455	0.122512	1
Dynlt3	5.741	6.001	1.198	0.122635	1
H2-DMb2	8.152	7.727	0.745	0.122656	1
Alkbh3	5.147	4.882	0.832	0.12315	1
Magi3	2.392	2.182	0.865	0.12324	1
Wbp11	6.8	6.463	0.792	0.123312	1
Rpl32	12.177	11.976	0.87	0.123359	1
Nfia	3.28	2.096	0.44	0.123412	1
Hsp90ab1	12.106	12.403	1.229	0.123444	1
Zfp384	1.725	2.998	2.417	0.123451	1
Pcbp1	7.165	7.827	1.583	0.123697	1
Polr1has	3.086	1.57	0.35	0.123702	1
Gramd1b	3.565	4.436	1.829	0.123865	1
Gimap3	5.778	4.874	0.534	0.123949	1
Zswim7	2.343	3.651	2.476	0.123958	1
Socs4	4.646	5.118	1.388	0.124026	1
Gpr65	3.731	4.404	1.595	0.124042	1
L3mbtl3	3.322	3.83	1.422	0.124059	1
Rps14	12.217	12.474	1.194	0.124162	1
Dhx38	6.189	5.719	0.722	0.124301	1
Bckdhb	2.901	1.105	0.288	0.124417	1
Adipor1	5.58	5.06	0.698	0.124549	1
Cd19	9.933	9.558	0.771	0.124787	1
Drg1	6.021	5.791	0.853	0.124798	1
Liph	3.236	1.772	0.363	0.124849	1
Nek8	3.487	2.354	0.456	0.124853	1
Mtres1	3.239	1.891	0.393	0.124863	1
Pdcd11	6.226	5.507	0.607	0.125335	1
Anp32a	7.261	7.015	0.843	0.125413	1
Prkcsh	6.556	6.143	0.751	0.125536	1
Kif3a	3.594	4.928	2.52	0.125631	1
Retsat	1.824	3.625	3.486	0.125761	1
Fam120a	8.018	8.425	1.325	0.125788	1
Morf4l1-ps1	1.662	3.234	2.974	0.125881	1
Suclg2	4.121	2.735	0.383	0.125962	1
Bap1	5.524	4.667	0.552	0.12618	1
S1pr1	3.767	3.278	0.713	0.126237	1
C87436	1.509	3.587	4.222	0.126294	1
Ubtd1	2.809	2.171	0.643	0.126456	1
Selplg	6.012	5.436	0.671	0.126679	1
Gm37233	3.202	2.495	0.612	0.126708	1
Luc7l3	8.8	9.071	1.206	0.126822	1
Dtymk	4.646	4.398	0.842	0.126918	1
Socs1	6.224	5.091	0.456	0.126993	1
Rpl13-ps6	2.666	2.095	0.673	0.127113	1
Timm50	5.632	6.237	1.521	0.127186	1
Snrnp25	7.358	7.894	1.451	0.127206	1
Glrx5	5.989	6.547	1.472	0.127274	1
Dlg3	4.004	2.293	0.305	0.127299	1
Bbof1	2.128	3.047	1.891	0.127321	1
Paip1	5.478	4.895	0.668	0.127476	1
Fcer2a	9.491	9.045	0.734	0.127811	1
Ddah2	3.103	4.723	3.072	0.128085	1
Ccdc34	6.078	5.518	0.678	0.128108	1
Eef1b2	10.416	10.619	1.151	0.128154	1
Nbas	4.005	3.693	0.805	0.128251	1
Ltv1	5.408	4.624	0.58	0.128558	1
Pold1	4.816	4.254	0.677	0.1286	1
Chchd2	8.351	9.153	1.743	0.128622	1
Clk3	5.964	6.677	1.639	0.128636	1
R74862	1.929	2.739	1.754	0.129307	1
Gar1	7.707	7.172	0.69	0.12932	1
Coasy	6.055	6.563	1.423	0.129353	1
Dip2a	3.317	2.466	0.554	0.129632	1
Mrpl12	6.069	6.443	1.296	0.129687	1
B3gnt2	6.077	6.382	1.235	0.129721	1
Slc2a3	4.823	3.572	0.42	0.129728	1
Nrd1	6.904	7.155	1.19	0.129769	1
Mtpap	5.019	5.446	1.344	0.129808	1
Fastkd5	3.252	1.958	0.408	0.129922	1
Slc25a13	3.418	4.555	2.199	0.129969	1
Fbxw4	4.404	4.628	1.169	0.130011	1
Ankrd50	3.893	4.585	1.615	0.130091	1
Mtch2	6.678	7.237	1.473	0.130198	1
Atp1a1	8.443	8.129	0.805	0.130249	1
Tpst1	3.323	2.417	0.534	0.130411	1
Igf2bp3	5.334	4.386	0.518	0.13069	1
Gm50602	1.738	3.599	3.631	0.130715	1
Fut8	2.475	3.98	2.838	0.130793	1
Smyd4	2.681	3.987	2.473	0.130872	1
Carmil2	5.557	4.739	0.567	0.13091	1
Mettl3	4.611	3.537	0.475	0.131031	1
Ddit4	9.05	8.395	0.635	0.131123	1
Pgrmc1	4.829	5.814	1.98	0.131451	1
Tmed2	4.791	5.516	1.652	0.131536	1
Adck2	3.704	2.598	0.465	0.131578	1
4930481A15Rik	3.154	1.65	0.353	0.131653	1
Fcrl1	2.864	1.021	0.279	0.131711	1
Thap2	5.528	4.434	0.469	0.13172	1
Stk17b	4.402	5.577	2.258	0.131828	1
Ndufs5	2.234	1.347	0.541	0.132009	1
Slc26a2	2.168	3.782	3.061	0.132039	1
Fbxl20	5.601	6.286	1.608	0.132137	1
Nsd2	6.603	6.266	0.792	0.13216	1
Prag1	4.27	3.569	0.615	0.132226	1
Dbnl	6.115	5.649	0.724	0.132349	1
Lrrc40	4.315	5.297	1.975	0.132498	1
Slc15a4	6.053	6.934	1.841	0.13263	1
Mbnl2	8.08	7.829	0.84	0.132698	1
Rsrp1	6.847	7.252	1.324	0.132702	1
Lrrc8d	6.138	6.473	1.262	0.13288	1
Timm44	6.956	7.172	1.161	0.132892	1
Tiprl	5.9	6.611	1.637	0.133087	1
Rab11b	6.073	6.443	1.292	0.133157	1
Il12rb1	2.864	3.396	1.445	0.133172	1
Rabep1	6.397	6.79	1.313	0.133198	1
Rpn2	6.89	6.528	0.778	0.133236	1
Cwc27	5.571	6.346	1.712	0.133266	1
Dnajc7	7.978	7.641	0.792	0.133311	1
Ell2	5.432	4.335	0.467	0.13337	1
Pla2g12a	8.245	8.023	0.857	0.133416	1
Rfwd3	4.891	5.233	1.268	0.133505	1
Tcf25	7.926	8.17	1.185	0.133527	1
St3gal5	3.286	4.065	1.715	0.133624	1
Ddb1	8.34	8.572	1.174	0.133757	1
Lsm4	7.792	7.542	0.841	0.134051	1
N6amt1	5.573	5.175	0.759	0.134055	1
Med16	4.476	3.395	0.473	0.134079	1
Phb2	7.874	8.063	1.14	0.134129	1
Dennd1b	5.567	4.283	0.411	0.134518	1
Ficd	1.868	3.275	2.652	0.134524	1
Ssbp3	5.876	5.335	0.688	0.134639	1
Emc6	7.356	7.014	0.789	0.134824	1
C330018D20Rik	2.363	4.163	3.483	0.134867	1
Lrig2	3.448	5.241	3.465	0.134867	1
Ap2b1	7.187	6.775	0.752	0.134897	1
Tbccd1	2.65	3.445	1.735	0.134911	1
Snhg5	7.979	7.61	0.774	0.135055	1
Gypc	4.32	2.49	0.281	0.135355	1
Ypel3	9.059	9.304	1.185	0.135651	1
Atp10d	1.623	1.243	0.769	0.135682	1
Ubap2l	7.568	7.219	0.785	0.135712	1
Napg	3.693	4.828	2.196	0.135744	1
Clcn3	7.868	7.491	0.77	0.135813	1
Ccna2	5.768	5.014	0.593	0.135865	1
Rbm42	6.791	6.417	0.772	0.135942	1
Pkn1	6.655	6.202	0.73	0.136131	1
Cdk7	5.268	4.524	0.597	0.136226	1
Gm36449	8.555	8.809	1.193	0.136322	1
Rabgef1	2.719	3.62	1.867	0.136323	1
Cd2ap	6.289	5.788	0.706	0.136331	1
Sap30l	5.292	4.545	0.596	0.136368	1
Cox8a	7.746	8.314	1.482	0.13644	1
Shc1	6.126	5.339	0.58	0.1367	1
Dcaf15	4.829	5.243	1.332	0.136702	1
Zfpm1	4.457	3.997	0.727	0.136786	1
Aarsd1	5.541	5.025	0.699	0.136956	1
Alg6	3.645	2.136	0.352	0.137066	1
Tnip1	6.223	5.731	0.711	0.137088	1
Herc2	6.359	6.836	1.392	0.137312	1
Adcy6	1.354	2.737	2.608	0.137487	1
Rab1b	5.009	5.455	1.362	0.13757	1
Rnps1	3.361	4.26	1.864	0.137591	1
Clasp1	6.276	6.26	0.989	0.137648	1
P4ha1	3.113	2.576	0.689	0.137698	1
Bicd2	3.938	4.278	1.266	0.137786	1
Dpp4	3.784	2.847	0.522	0.137971	1
Trim39	3.857	3.078	0.583	0.138117	1
Lancl1	5.359	5.88	1.435	0.138198	1
Sgf29	5.223	4.425	0.575	0.138659	1
Zfp287	1.945	3.567	3.078	0.138709	1
Ubtf	7.775	7.625	0.901	0.138778	1
Nup93	6.107	6.624	1.431	0.138823	1
Git2	6.019	5.481	0.689	0.138873	1
Sephs1	6.046	4.967	0.473	0.138877	1
Lysmd4	4.242	5.267	2.034	0.138896	1
Ostc	7.112	7.841	1.658	0.139304	1
Homer3	3.042	3.919	1.836	0.139459	1
Aldh1l2	6.858	6.622	0.849	0.139537	1
Atp6ap1	7.279	7.948	1.59	0.13954	1
Vps54	3.661	4.662	2.001	0.139557	1
Esrra	3.631	4.028	1.317	0.139572	1
Rif1	7.048	6.707	0.789	0.139618	1
H2az1	6.947	6.309	0.643	0.139635	1
Trmt61b	3.176	1.306	0.274	0.139716	1
Cops5	5.627	6.177	1.464	0.139723	1
Sorl1	5.607	4.603	0.499	0.139823	1
Map2k4	5.672	5.232	0.737	0.13984	1
Slc38a10	7.142	6.787	0.782	0.139886	1
Mob1b	2.258	1.447	0.57	0.139954	1
Phactr2	3.446	2.695	0.594	0.140131	1
D5Ertd579e	3.535	4.22	1.608	0.140283	1
Otud4	6.195	5.752	0.735	0.140331	1
Dock7	1.466	3.106	3.118	0.140349	1
Rpl30	10.191	9.905	0.82	0.140588	1
Pias3	4.41	5.407	1.995	0.140771	1
Iws1	6.091	5.862	0.853	0.14122	1
Spc24	4.813	4.237	0.671	0.14141	1
Vps26b	3.166	4.342	2.26	0.141429	1
Notch1	5.297	3.529	0.294	0.141552	1
Rnf138	5.608	4.859	0.595	0.141609	1
Abca2	4.056	4.848	1.731	0.141674	1
Samsn1	8.752	8.871	1.086	0.141894	1
Hipk1	5.071	5.75	1.601	0.14194	1
Foxj2	5.586	5.015	0.673	0.142009	1
Cdca2	6.268	5.438	0.562	0.142406	1
Rbm19	4.144	4.869	1.652	0.142591	1
Ccdc115	6.041	6.803	1.696	0.142691	1
Pfn2	2.898	3.576	1.601	0.142705	1
Msrb1	5.737	6.473	1.665	0.142714	1
Ipo5	6.416	5.893	0.696	0.142774	1
Emc10	5.956	6.07	1.082	0.142789	1
Srm	6.603	6.223	0.768	0.142823	1
Ubr4	7.618	7.967	1.274	0.14299	1
Adat2	4.775	3.101	0.313	0.143346	1
Mad1l1	5.363	4.78	0.668	0.143348	1
Rnf2	5.846	6.243	1.317	0.143413	1
Hsf1	4.656	4.157	0.708	0.143714	1
Zfp740	5.481	4.764	0.609	0.143861	1
Cyp4v3	3.773	5.269	2.82	0.143876	1
Tef	4.44	5.546	2.152	0.143892	1
Arl8b	6.413	6.589	1.13	0.143911	1
P2rx3	6.413	7.239	1.773	0.144133	1
Neurl2	2.225	3.465	2.361	0.144161	1
Rfx3	1.542	2.768	2.339	0.144181	1
Srp54c	3.179	1.699	0.358	0.144303	1
Babam1	6.97	6.694	0.826	0.144437	1
Cul4a	3.264	4.027	1.698	0.144442	1
Chd1l	3.585	4.619	2.049	0.144502	1
Tctn1	3.082	2.632	0.732	0.144573	1
Syce2	5.046	4.753	0.817	0.144599	1
Phldb1	2.995	2.437	0.679	0.144629	1
Lratd2	4.029	2.11	0.265	0.144637	1
4933440N22Rik	3.108	2.189	0.529	0.144715	1
Ccdc92	2.356	3.034	1.6	0.144762	1
Bnip2	7.106	7.583	1.392	0.145121	1
Sfxn1	7.552	7.889	1.263	0.145134	1
Kdm7a	6.242	6.519	1.211	0.145186	1
Gm6829	1.769	1.011	0.592	0.145216	1
Tbce	4.886	4.067	0.567	0.14524	1
Nexn	2.172	3.464	2.45	0.145706	1
Ccl25	2.782	1.291	0.356	0.145998	1
Ube2f	5.938	5.056	0.543	0.146072	1
Nupl2	4.036	2.185	0.277	0.14615	1
Tmem50a	8.069	8.528	1.374	0.146529	1
Hus1	3.688	2.465	0.428	0.146692	1
Rplp2	10.538	10.935	1.317	0.146835	1
Tuba1b	6.7	7.863	2.239	0.146846	1
Dis3	7.143	6.771	0.773	0.146969	1
Tnfrsf8	7.804	7.181	0.65	0.147124	1
Rrnad1	4.412	3.905	0.704	0.147171	1
Kif20a	5.16	4.274	0.541	0.147362	1
Tspan5	4.973	3.834	0.454	0.147502	1
Med13l	7.46	7.108	0.783	0.147503	1
Lpcat3	4.399	4.929	1.444	0.147567	1
2610008E11Rik	5.269	4.528	0.598	0.147674	1
Yipf3	6.476	6.145	0.795	0.14795	1
Amigo1	3.307	1.864	0.368	0.148143	1
Qser1	5.048	3.866	0.441	0.148174	1
Ryk	3.797	4.42	1.54	0.148191	1
Sdr42e1	1.231	3.287	4.157	0.148409	1
Pogk	5.23	5.886	1.576	0.148419	1
Fcho1	5.971	5.724	0.843	0.148467	1
Taok1	7.689	8.062	1.295	0.148495	1
Rex1bd	5.1	4.862	0.848	0.148496	1
Gbp2	4.458	3.899	0.679	0.148559	1
Ap1g1	6.459	5.756	0.614	0.148594	1
Ppp1r14b	6.498	6.787	1.222	0.148625	1
Itga4	4.378	3.201	0.442	0.148675	1
Gngt2	5.315	5.885	1.484	0.148676	1
Fam210b	4.611	4.313	0.813	0.148722	1
Ighg3	2.311	1.431	0.543	0.148781	1
Pgd	5.571	5.945	1.296	0.148789	1
Rpph1	2.297	3.496	2.296	0.148823	1
Kdm2a	6.773	7.103	1.257	0.148957	1
Gtf2h4	4.622	4.937	1.244	0.149116	1
Dcun1d2	3.935	1.708	0.214	0.149135	1
Zhx2	4.333	3.242	0.469	0.149285	1
Tti1	4.339	4.864	1.439	0.149325	1
Hnrnpa3	5.807	6.261	1.37	0.149325	1
Jcad	3.657	2.142	0.35	0.149399	1
Gm43560	1.542	3.232	3.226	0.149422	1
Hmgn3	5.759	6.579	1.766	0.149569	1
Mis18bp1	4.04	4.719	1.601	0.149607	1
Npm1	9.739	10.079	1.266	0.149798	1
Knstrn	5.355	4.477	0.544	0.149812	1
Prkcb	9.77	9.53	0.847	0.149909	1
Cd79b	10.558	10.006	0.682	0.150213	1
Marchf6	5.299	5.832	1.447	0.150335	1
Ctbp1	6.651	7.001	1.275	0.150368	1
Txndc16	1.959	3.457	2.825	0.150594	1
Trabd	7.222	6.754	0.723	0.150837	1
Xpo4	4.753	5.36	1.523	0.150923	1
Rangap1	7.275	7.617	1.267	0.151036	1
Borcs6	6.094	5.705	0.764	0.151184	1
Rps27	10.418	10.033	0.766	0.151213	1
Gltp	6.214	5.448	0.588	0.151266	1
Gmppb	5.03	4.473	0.68	0.151297	1
Srsf3	6.936	7.563	1.544	0.1514	1
Myc	5.274	4.123	0.45	0.151541	1
Ndufs3	5.553	5.088	0.724	0.151567	1
Ndufa6	7.58	7.255	0.798	0.151637	1
Slc25a44	5.41	4.771	0.642	0.151846	1
Zfp952	4.101	4.853	1.684	0.15198	1
Tcf7l1	2.203	2.969	1.701	0.152031	1
Cpsf2	7.465	7.034	0.742	0.152364	1
Hira	3.899	2.823	0.474	0.152556	1
Nipa2	4.98	5.186	1.154	0.152565	1
Mtg1	4.311	5.029	1.646	0.152594	1
Nkapd1	6.305	5.573	0.602	0.152891	1
Immt	6.701	7.061	1.283	0.152917	1
Ccni	6.245	6.971	1.654	0.152944	1
Eola1	2.495	3.781	2.439	0.152968	1
Rassf3	5.282	6.084	1.743	0.152994	1
Anxa2	2.345	3.647	2.466	0.153019	1
Ube2a	5.93	5.398	0.692	0.15312	1
Ttc32	4.571	3.023	0.342	0.153184	1
Wee1	5.152	4.789	0.778	0.153511	1
Pfkm	3.369	2.3	0.477	0.153682	1
Hpgds	6.475	5.29	0.44	0.153683	1
Ddt	5.683	5.405	0.825	0.153763	1
Amn1	2.149	3.71	2.952	0.15378	1
Acot7	3.844	5.44	3.024	0.153834	1
Smg6	4.798	5.755	1.941	0.15384	1
Hint1	8.952	9.301	1.273	0.153889	1
Cd37	7.874	7.224	0.637	0.153891	1
Zfp949	2.662	2.829	1.123	0.153947	1
Clptm1l	6.073	5.475	0.661	0.154011	1
Vopp1	3.767	4.75	1.976	0.15412	1
Dusp28	1.203	2.695	2.814	0.154131	1
Gm14719	2.253	1.412	0.558	0.154265	1
Tanc2	6.354	5.669	0.622	0.154312	1
Klhl26	2.859	3.941	2.117	0.154384	1
Ston2	2.69	1.404	0.41	0.15445	1
Hnrnph1	5.258	5.825	1.481	0.154472	1
Ap1s3	3.137	2.558	0.669	0.154733	1
Rsad1	2.086	4.112	4.072	0.15474	1
Zfp579	3.426	2.441	0.505	0.154864	1
Stx1a	1.9	3.474	2.978	0.155058	1
Babam2	2.813	1.95	0.55	0.155131	1
Csnk1g3	5.026	5.451	1.342	0.155151	1
Taf4b	4.363	3.562	0.574	0.155241	1
Gls	6.645	6.423	0.857	0.155286	1
Frmd8	6.104	6.633	1.442	0.155353	1
Bckdha	5.412	5.17	0.845	0.155798	1
Rps8	10.998	11.106	1.077	0.15582	1
Insyn1	4.885	4.155	0.603	0.155898	1
Gxylt1	5.017	3.81	0.433	0.155954	1
Fmnl1	7.49	7.125	0.777	0.15596	1
Foxp1	8.817	8.964	1.107	0.156944	1
Pea15a	6.036	6.502	1.38	0.157235	1
Stap1	4.234	3.711	0.696	0.157568	1
Bdp1	6.642	6.278	0.777	0.15763	1
Sgpp1	4.827	5.356	1.443	0.157811	1
Osbpl5	2.409	3.131	1.649	0.15804	1
Adprhl1	1.457	2.613	2.23	0.158106	1
Prr3	3.824	4.688	1.82	0.15833	1
Zfp628	3.81	4.499	1.612	0.158413	1
Cmtm8	2.94	2.289	0.637	0.158439	1
Asah1	2.753	3.916	2.24	0.158488	1
Adipor2	6.499	6.088	0.752	0.158542	1
D2hgdh	2.486	1.49	0.501	0.158706	1
Abhd13	4.835	3.906	0.525	0.158723	1
Zfp770	2.453	3.093	1.559	0.158767	1
Wasl	5.089	4.496	0.663	0.158773	1
Blnk	8.593	8.051	0.687	0.158804	1
Rnmt	4.947	5.656	1.635	0.158817	1
Prpsap2	5.412	5.367	0.97	0.158856	1
Psd3	2.829	3.994	2.243	0.158859	1
Ranbp2	5.535	5.313	0.858	0.158889	1
Brap	4.114	3.918	0.873	0.158966	1
Gm7592	4.698	4.322	0.77	0.159102	1
Mnd1	2.917	1.574	0.394	0.159222	1
Nol8	6.774	6.34	0.74	0.159233	1
Bmp2k	6.054	5.645	0.753	0.159247	1
TrnS2	1.209	2.743	2.897	0.159268	1
Slc11a2	3.321	3.881	1.475	0.159299	1
Daglb	3.358	2.11	0.421	0.159525	1
Dhx32	3.399	3.121	0.825	0.159565	1
Esam	3.69	5.429	3.339	0.159605	1
Cd74	10.433	9.898	0.69	0.159772	1
C030006K11Rik	4.793	3.205	0.332	0.159893	1
Prdm2	6.155	5.774	0.768	0.160144	1
Fam193b	5.906	6.53	1.541	0.160166	1
Nup214	5.779	5.264	0.699	0.160338	1
Hmgn2	2.745	4.111	2.577	0.160368	1
Nrp2	2.162	1.128	0.488	0.1605	1
Cd82	6.548	6.293	0.838	0.16058	1
Paqr7	1.337	2.821	2.799	0.16066	1
Pttg1ip	6.091	6.73	1.558	0.160982	1
Bach1	3.456	4.501	2.064	0.160993	1
Vps13c	4.195	4.995	1.741	0.16114	1
Them4	4.753	5.559	1.748	0.161374	1
Alg9	5.587	4.91	0.625	0.161488	1
Fam53b	7.06	6.356	0.614	0.161489	1
Gadd45g	8.14	7.588	0.682	0.161521	1
Mid1ip1	6.544	5.652	0.539	0.161575	1
Kif22	5.908	5.577	0.795	0.161616	1
Pds5b	5.525	6.248	1.65	0.161623	1
Slc31a1	4.35	3.959	0.763	0.161645	1
Polq	3.408	4.571	2.239	0.16165	1
Med21	5.778	5.281	0.709	0.161739	1
Psip1	7.476	6.962	0.7	0.161749	1
Rplp1	12.972	13.226	1.192	0.161755	1
Aldh6a1	3.271	1.242	0.245	0.161772	1
Top2b	7.219	7.629	1.329	0.161824	1
Apoa2	2.191	1.412	0.583	0.161971	1
Krtcap2	9.623	9.378	0.844	0.162064	1
Rpl37a	9.792	9.605	0.878	0.162113	1
Arid4b	7.615	7.86	1.185	0.162609	1
Zwint	7.157	7.529	1.295	0.162838	1
St6gal1	8.393	8.022	0.773	0.162878	1
2510002D24Rik	6.399	5.709	0.62	0.162897	1
3300002I08Rik	3.834	4.935	2.145	0.162963	1
Gfus	5.552	6.215	1.583	0.163065	1
Ttyh3	7.133	6.7	0.741	0.163067	1
Rhot2	4.451	3.925	0.695	0.163089	1
Bcas2	6.661	6.233	0.743	0.163215	1
Rpf2	6.378	5.776	0.659	0.163216	1
Sema7a	6.259	5.518	0.598	0.163285	1
Gm37065	3.375	1.438	0.261	0.163413	1
Hp1bp3	7.898	8.235	1.264	0.163523	1
Ehbp1	1.292	3.273	3.948	0.163593	1
Atf4	9.633	10.028	1.314	0.163606	1
Vps25	6.773	6.444	0.796	0.163694	1
Gm8369	5.361	6.424	2.089	0.163773	1
Dennd4b	5.31	4.879	0.742	0.163789	1
Atg4a	3.645	4.913	2.409	0.163856	1
Atxn2l	8.003	7.576	0.744	0.164024	1
Rps9	10.566	10.892	1.254	0.164484	1
Sod1	9.402	9.597	1.145	0.164535	1
Fem1a	4.38	4.8	1.339	0.164605	1
Irf2	7.364	7.051	0.805	0.164633	1
Crtc3	5.304	4.841	0.725	0.16488	1
Arfgap3	4.001	5.138	2.199	0.165036	1
Tm9sf2	5.975	6.283	1.238	0.165103	1
Sec22c	1.334	2.754	2.676	0.165329	1
Herc6	1.77	3.567	3.475	0.165375	1
Il5ra	5.671	6.362	1.614	0.165538	1
Simc1	2.486	3.809	2.502	0.165813	1
St8sia6	4.795	2.031	0.147	0.16592	1
Gtf2ird2	3.867	4.744	1.837	0.165957	1
Sh2d3c	3.055	3.342	1.22	0.165979	1
Ei24	5.29	4.474	0.568	0.166208	1
Zfp94	3.336	1.26	0.237	0.16624	1
Rpl7	11.471	11.33	0.907	0.16625	1
Tmc8	4.583	4.048	0.69	0.166347	1
B2m	12.034	11.593	0.736	0.16646	1
Adck5	3.704	2.944	0.591	0.166531	1
Rin3	2.29	1.364	0.526	0.166764	1
Mgll	2.757	4.44	3.213	0.16688	1
Prr5	3.962	2.087	0.273	0.166973	1
Gm29733	4.635	5.274	1.557	0.167037	1
Abhd17a	4.204	3.163	0.486	0.167083	1
Cc2d1b	4.94	5.545	1.521	0.167119	1
Tmem68	5.143	4.251	0.539	0.16723	1
Rp9	7.469	6.938	0.692	0.167321	1
Cst7	7.6	7.175	0.745	0.167364	1
Mndal	5.344	4.415	0.525	0.167403	1
Mrpl42	5.102	4.418	0.622	0.167582	1
Eif5a	8.999	8.801	0.872	0.167818	1
Tspan31	4.771	5.284	1.427	0.168131	1
Dcaf17	5.341	4.223	0.461	0.168263	1
Spopl	4.976	5.463	1.401	0.168313	1
Gm22680	2.567	4.067	2.828	0.168427	1
Rps28	10.956	10.688	0.83	0.168485	1
a	6.327	7.615	2.441	0.168495	1
Dapp1	5.619	5.077	0.687	0.168506	1
Ndufaf5	3.583	2.883	0.615	0.16853	1
Pik3cd	7.775	8.389	1.531	0.168592	1
Csnk2a1	6.913	7.242	1.256	0.168835	1
Yipf5	7.036	6.24	0.576	0.168839	1
Snrpd2	6.236	5.794	0.736	0.168972	1
Sap30bp	5.539	4.832	0.613	0.169142	1
Adal	2.018	3.344	2.507	0.169316	1
Srp68	7.022	6.107	0.53	0.169533	1
Slc38a7	5.04	5.629	1.504	0.16974	1
Lin7c	4.899	5.868	1.958	0.169971	1
Gprin3	4.711	4.013	0.616	0.170073	1
Anp32e	8.355	8.05	0.809	0.170103	1
Phc3	7.643	7.373	0.829	0.170195	1
Ganab	7.113	7.426	1.242	0.17022	1
Dact3	3.15	2.755	0.76	0.1704	1
Tomm70a	6.816	7.257	1.358	0.170562	1
P4htm	2.482	1.511	0.51	0.170698	1
Zfp983	5.508	5.06	0.733	0.170739	1
Prkrip1	6.052	5.573	0.717	0.170763	1
Ptpn4	3.017	4.112	2.135	0.170786	1
Snrpa1	4.924	5.486	1.476	0.170829	1
Pfn1	8.859	8.898	1.027	0.170838	1
Fbxo25	3.555	2.708	0.556	0.170951	1
Bak1	4.554	5.053	1.413	0.170983	1
Pxk	7.33	6.715	0.653	0.171004	1
Zfp398	2.908	4.324	2.669	0.171408	1
Cobll1	2.875	1.337	0.344	0.171534	1
Gins2	4.356	3.776	0.669	0.171782	1
Mterf3	4.828	2.823	0.249	0.171796	1
Agps	5.235	4.304	0.525	0.171835	1
Elf4	4.866	5.294	1.345	0.172038	1
Grcc10	7.585	7.13	0.729	0.172117	1
Serhl	5.452	6.201	1.68	0.17213	1
Gm25789	1.164	1.855	1.615	0.172159	1
Slc26a11	2.78	3.633	1.806	0.172179	1
Tnrc6c	7.684	7.316	0.775	0.17228	1
Rapgef5	3.91	2.657	0.419	0.172302	1
Rab9	4.408	3.397	0.496	0.172327	1
Smim20	4.952	4.427	0.695	0.172373	1
Eps8l1	4.48	4.019	0.727	0.172424	1
Icosl	1.218	3.38	4.474	0.172455	1
Mrpl14	6.329	6.142	0.878	0.17255	1
Aicda	8.655	7.547	0.464	0.172751	1
Ddx49	6.239	6.124	0.924	0.172791	1
Ncoa5	5.21	4.649	0.678	0.172808	1
Ap2s1	6.87	7.282	1.33	0.173034	1
Dgat1	4.199	4.761	1.476	0.173199	1
Itgb1bp2	2.137	3.105	1.956	0.173219	1
Klhl20	3.944	3.764	0.883	0.173313	1
Patl1	5.349	5.913	1.479	0.173319	1
Foxk1	6.286	5.737	0.683	0.173371	1
Ttc13	3.914	4.904	1.987	0.173589	1
Arcn1	5.102	4.138	0.513	0.173651	1
Inpp5d	6.495	5.942	0.681	0.173658	1
Cep152	3.394	4.398	2.006	0.17384	1
Itga6	4.21	3.203	0.498	0.173868	1
Mipep	4.16	3.058	0.466	0.173964	1
Rgs14	2.197	3.444	2.374	0.173983	1
Alg11	4.268	4.787	1.433	0.174119	1
Fbxl19	4.547	3.556	0.503	0.174128	1
Ulk3	3.636	4.328	1.616	0.174166	1
Cdc27	6.346	5.552	0.577	0.174364	1
Ergic3	6.718	6.557	0.894	0.174412	1
Ywhab	8.614	8.814	1.149	0.174553	1
Cops7b	4.746	5.465	1.646	0.174766	1
LOC115487771	2.827	3.782	1.938	0.174781	1
Dcxr	5.338	5.033	0.809	0.174869	1
Ntan1	4.057	4.445	1.309	0.17492	1
Dnajb11	6.049	5.453	0.661	0.175032	1
Mettl17	4.105	2.939	0.446	0.175043	1
Rwdd4a	6.324	6.82	1.41	0.17508	1
Tor4a	3.638	1.325	0.201	0.175458	1
Slain1	2.381	1.831	0.683	0.175556	1
Rnf213	4.734	3.852	0.543	0.175597	1
Mis12	3.998	4.482	1.399	0.175748	1
Rnf208	2.33	1.177	0.45	0.176016	1
Brd9	6.314	6.586	1.208	0.176023	1
Aftph	6.999	6.594	0.755	0.176086	1
Ppp2r5e	6.9	6.58	0.801	0.176158	1
1700010I14Rik	3.523	1.905	0.326	0.176259	1
Ipo9	4.509	5.496	1.981	0.176281	1
Snord52	1.962	2.879	1.888	0.176313	1
Nup153	4.505	3.762	0.598	0.176363	1
Rara	5.272	4.536	0.6	0.176413	1
Hspa5	11.019	11.173	1.113	0.17648	1
Mrpl18	6.304	6.077	0.854	0.176495	1
Helz2	4.121	3.214	0.533	0.176677	1
Nkap	6.363	5.489	0.545	0.17684	1
A630001G21Rik	7.464	6.585	0.544	0.176863	1
Phf5a	7.008	7.603	1.51	0.176917	1
Zfp668	3.604	4.337	1.662	0.177389	1
Nagk	5.434	6.704	2.411	0.177479	1
Ctsh	8.6	7.606	0.502	0.17766	1
Mfsd6	4.242	4.703	1.376	0.17777	1
Nkrf	3.208	3.598	1.311	0.177824	1
Jmjd1c	6.03	6.794	1.698	0.177953	1
Pik3c2b	3.714	2.726	0.504	0.17801	1
Myef2	4.15	5.546	2.631	0.178029	1
Sod2	5.327	4.762	0.676	0.178175	1
Dapk3	3.399	3.053	0.787	0.178187	1
Phf10	8.946	9.11	1.121	0.178204	1
Psma2	8.542	8.846	1.235	0.178282	1
Cd2bp2	6.357	6.084	0.828	0.178509	1
Abcc5	2.973	4.742	3.408	0.178525	1
Sowahc	3.715	5.199	2.799	0.178537	1
Pms1	3.147	2.236	0.532	0.178838	1
Pde4d	2.645	1.021	0.324	0.179131	1
4930503L19Rik	5.139	4.545	0.663	0.179277	1
Gcc1	2.983	3.702	1.646	0.179294	1
Ogfod2	4.37	5.304	1.91	0.179337	1
Adam10	5.887	5.399	0.713	0.179368	1
Il6	2.732	1.95	0.582	0.179561	1
Fcf1	7.634	8.048	1.333	0.179969	1
Tlr1	5.026	3.839	0.439	0.180194	1
Rpa2	5.846	6.449	1.519	0.180234	1
Mecp2	6.333	5.388	0.519	0.180261	1
Birc5	7.345	7.988	1.562	0.180923	1
Samd8	6.283	5.249	0.488	0.181065	1
Gm26782	3.954	4.75	1.736	0.181147	1
Dync1li1	4.664	5.292	1.545	0.181188	1
Donson	4.748	2.362	0.191	0.181205	1
Manea	5.948	5.58	0.775	0.181235	1
Vps13d	4.702	4.118	0.667	0.181256	1
Dnajc3	6.654	5.91	0.597	0.181299	1
Cdk20	1.126	2.689	2.953	0.181406	1
Poglut1	5.477	5.073	0.756	0.181498	1
Fam20c	2.967	2.128	0.559	0.181629	1
COX1	10.107	10.329	1.166	0.181673	1
Glipr1	6.874	7.737	1.819	0.181724	1
Hexb	4.036	4.575	1.453	0.181777	1
Dnajc8	8.479	8.592	1.081	0.181951	1
Cad	4.929	4.68	0.841	0.18204	1
Mzb1	11.186	10.818	0.775	0.182062	1
Ptpn12	4.133	4.989	1.809	0.182129	1
Tmbim1	3.75	3.976	1.17	0.182191	1
Slc25a37	4.478	4.962	1.398	0.182457	1
Cstf3	5.714	6.373	1.579	0.182483	1
Cep85l	4.453	3.934	0.698	0.182596	1
Ulk1	4.507	5.168	1.582	0.182666	1
Gen1	4.152	2.715	0.369	0.182919	1
Sumo3	7.934	8.433	1.413	0.182956	1
H2-Oa	6.066	4.965	0.466	0.182976	1
Tmem67	3.686	2.318	0.387	0.182976	1
Reep5	6.453	7.148	1.62	0.183084	1
Ube2q1	6.98	6.458	0.696	0.183229	1
Cep89	3.878	1.65	0.213	0.183316	1
Pcyox1	3.707	3.036	0.628	0.183382	1
Scaf11	7.429	7.127	0.812	0.183385	1
Ociad1	7.275	7.024	0.84	0.183536	1
Nr1h3	1.202	2.671	2.769	0.183742	1
Wdr74	5.561	5.347	0.862	0.183776	1
Lrfn1	2.69	1.716	0.509	0.183864	1
Trappc14	5.412	5.958	1.46	0.183893	1
Mtbp	4.651	4.959	1.238	0.183955	1
Cwf19l2	6.683	7.033	1.274	0.18396	1
H2-Eb1	11.121	10.557	0.676	0.184016	1
Ywhag	6.971	7.625	1.573	0.184156	1
Bfar	6.071	6.372	1.232	0.184214	1
Odf2l	2.768	1.578	0.438	0.184242	1
Rnf135	4.744	3.704	0.486	0.184265	1
Psmd9	5.801	5.504	0.814	0.184575	1
Usp7	8.041	7.545	0.709	0.184836	1
Cyld	5.276	6.113	1.786	0.184997	1
Insig1	2.751	1.592	0.448	0.18504	1
Lonp1	8.86	8.803	0.961	0.185084	1
Gse1	4.459	3.314	0.452	0.185165	1
Gm54052	2.606	4.131	2.878	0.185592	1
Nectin2	1.463	3.268	3.496	0.185642	1
Rps27a	8.496	8.69	1.144	0.185646	1
Edc4	5.391	4.827	0.677	0.185675	1
Phpt1	6.266	5.794	0.721	0.18575	1
Cxcr5	5.371	3.477	0.269	0.185977	1
H4c6	2.55	1.762	0.579	0.186116	1
Myom2	2.223	1.528	0.618	0.18616	1
Nelfb	5.03	5.419	1.309	0.186206	1
2310039H08Rik	5.155	4.783	0.773	0.186444	1
Gpkow	4.396	4.891	1.409	0.1867	1
Aven	5.294	4.671	0.649	0.186793	1
Pcbp3	2.977	3.431	1.37	0.186806	1
Rspry1	5.733	5.448	0.821	0.186859	1
Hnrnpdl	7.077	7.459	1.303	0.186969	1
Lrrc59	7.03	6.419	0.655	0.186983	1
Ccdc91	5.387	4.926	0.727	0.187202	1
Strn	3.977	4.988	2.016	0.187286	1
Cars2	3.784	4.454	1.592	0.187452	1
Fip1l1	7.277	6.894	0.767	0.187543	1
Ccdc47	7.673	7.359	0.804	0.18758	1
Atp1b1	5.776	4.757	0.493	0.187655	1
Rai1	6.119	5.533	0.666	0.187843	1
St3gal1	3.006	3.912	1.875	0.187995	1
Akap8	5.705	5.093	0.654	0.188445	1
Lrrc47	6.633	6.288	0.788	0.188507	1
Lnx2	6.176	5.935	0.846	0.188519	1
Gnb1l	1.721	3.375	3.145	0.188625	1
Trim46	2.71	3.743	2.046	0.188661	1
Fkrp	4.141	4.832	1.614	0.188718	1
Lsm1	5.262	4.165	0.467	0.18872	1
Gm54127	4.229	3.855	0.772	0.188876	1
Tnks	3.323	4.371	2.068	0.188922	1
Zbtb45	3.179	2.006	0.444	0.189013	1
9930104L06Rik	3.334	1.691	0.32	0.189126	1
Zfp82	2.175	3.341	2.245	0.189144	1
Tmem250-ps	4.277	3.116	0.447	0.189192	1
Zfp748	3.962	2.686	0.413	0.189252	1
Orai3	5.512	4.691	0.566	0.189275	1
Specc1	1.215	2.056	1.79	0.18936	1
Klf6	7.173	7.993	1.765	0.189447	1
Armcx4	2.732	3.606	1.833	0.189564	1
Mybpc2	1.917	2.622	1.631	0.189567	1
Tsix	1.236	2.046	1.753	0.189592	1
Dnajc15	4.892	4.567	0.798	0.189768	1
Plxnd1	4.376	4.93	1.468	0.189857	1
Tmem156	4.915	4.411	0.705	0.189898	1
Sars2	2.724	3.166	1.359	0.190104	1
Peak1	4.113	4.588	1.39	0.190294	1
B3gnt7	5.243	4.447	0.576	0.190372	1
Rcbtb1	5.243	5.023	0.859	0.190384	1
Atp6v1d	7.488	7.872	1.305	0.190503	1
4930526I15Rik	4.103	3.456	0.639	0.190542	1
Rps29	11.717	11.339	0.769	0.190657	1
Lyst	5.309	3.727	0.334	0.190804	1
Otud3	4.813	3.732	0.473	0.190883	1
Cstpp1	2.517	3.505	1.983	0.19089	1
Gsn	4.601	5.326	1.653	0.19091	1
Gm36809	4.76	3.853	0.533	0.190983	1
Zc3h12d	6.803	6.443	0.779	0.190998	1
Pms2	4.34	4.943	1.519	0.191133	1
Ska3	1.894	3.581	3.22	0.19117	1
Zfp362	7.107	6.754	0.783	0.191302	1
Entpd5	5.803	5.39	0.751	0.191316	1
Epb41l4aos	6.278	5.679	0.66	0.191337	1
Colgalt1	7.089	6.664	0.745	0.191431	1
Calr	9.039	8.726	0.805	0.191466	1
Scamp1	2.262	3.812	2.928	0.191524	1
Slc36a4	3.115	2.313	0.574	0.191605	1
Dync1i2	8.197	8.513	1.245	0.191925	1
Pde7b	3.5	2.742	0.591	0.192015	1
Rps15	10.376	10.062	0.804	0.192154	1
Upf3a	6.972	6.559	0.751	0.192162	1
Fcmr	4.333	1.535	0.144	0.192248	1
0610010K14Rik	6.003	5.743	0.835	0.192305	1
Ebna1bp2	6.383	6.725	1.267	0.192856	1
Stt3b	7.674	7.497	0.885	0.193006	1
n-TUtca2	3.359	4.217	1.813	0.193094	1
Wbp2	6.589	6.815	1.17	0.193135	1
Tmem201	3.025	1.5	0.348	0.193398	1
Mks1	3.128	4.472	2.539	0.193478	1
Fam117a	2.145	3.124	1.971	0.193519	1
Gstp-ps	4.499	2.051	0.183	0.193581	1
BC035044	4.104	1.251	0.138	0.193684	1
Cpne3	4.549	4.867	1.246	0.193699	1
Fkbp3	6.346	5.633	0.61	0.193708	1
Hspb8	1.104	2.549	2.723	0.193818	1
Ubxn4	9.238	9.53	1.224	0.193899	1
Rmi1	3.788	3.011	0.584	0.193912	1
Msl2	6.618	6.326	0.817	0.194024	1
Ctdsp2	5.677	5.147	0.693	0.1941	1
Orc2	6.249	5.775	0.72	0.194173	1
Polr2i	6.841	6.434	0.754	0.194291	1
Polr2d	3.657	4.203	1.46	0.194391	1
D17H6S56E-5	8.251	8.844	1.508	0.194503	1
Atr	4.576	3.838	0.599	0.194708	1
Aldh4a1	3.183	3.862	1.601	0.194818	1
Bloc1s4	4.072	4.533	1.376	0.194824	1
Igsf9	1.455	3.041	3.002	0.19486	1
Tgfb1	5.565	4.288	0.413	0.194868	1
Sp1	6.934	7.215	1.215	0.194902	1
Lamtor5	6.359	6.159	0.87	0.195188	1
Gpr15	2.659	4.083	2.683	0.195251	1
Got2	8.294	8.12	0.887	0.195347	1
Rtn4ip1	4.298	3.553	0.597	0.195425	1
Sh3d19	1.917	3.207	2.444	0.195531	1
Osgepl1	2.9	2.099	0.574	0.195599	1
Ahcyl1	6.468	5.63	0.559	0.195651	1
Sec16a	5.421	5.185	0.849	0.195655	1
Wiz	5.624	4.998	0.648	0.195689	1
Cd53	7.719	7.129	0.664	0.195707	1
Gga3	5.22	4.616	0.658	0.195812	1
Ssx2ip	3.342	4.151	1.751	0.195892	1
Rab11a	5.811	5.425	0.765	0.196051	1
Ncoa7	4.833	4.061	0.585	0.196179	1
Fhip2b	4.186	4.809	1.54	0.196252	1
Rpl13a	11.154	11.369	1.161	0.196299	1
Gab2	4.069	5.287	2.327	0.196445	1
Smug1	3.462	4.319	1.811	0.196448	1
Gm31597	3.037	3.845	1.751	0.196479	1
Osm	1.379	3.473	4.269	0.196491	1
Fpgt	2.993	1.617	0.385	0.196663	1
Ifi30	7.873	7.592	0.823	0.196759	1
Lgals3	5.96	7.012	2.074	0.196819	1
Bbip1	6.871	6.212	0.633	0.196916	1
Tmem11	5.453	5.899	1.363	0.197069	1
Pabpc1	10.844	10.46	0.766	0.197101	1
Flt3l	5.089	5.604	1.429	0.19712	1
Ube2b	5.93	6.762	1.78	0.197215	1
Lrrfip1	7.038	7.245	1.154	0.197251	1
Tbc1d15	6.82	5.742	0.474	0.197289	1
Bpgm	2.612	3.505	1.857	0.197374	1
Dnajb3	1.024	2.202	2.263	0.197381	1
Gm33682	5.834	6.654	1.765	0.197419	1
Batf	7.054	6.251	0.573	0.197489	1
Pom121	5.653	5.256	0.76	0.197755	1
Fbrsl1	3.881	3.502	0.769	0.19787	1
Ints2	4.723	5	1.212	0.197961	1
Gm14681	2.632	3.368	1.665	0.198212	1
Csrp1	3.661	4.864	2.302	0.198387	1
Itsn2	7.162	6.733	0.742	0.198427	1
Zfp870	3.104	3.921	1.761	0.198445	1
Atg101	5.425	5.991	1.48	0.198608	1
Slc52a2	3.814	4.433	1.535	0.198735	1
Zfp956	3.255	4.463	2.311	0.199063	1
Rnf19a	4.731	3.275	0.365	0.199466	1
Map2k2	7.537	6.966	0.673	0.199509	1
Tmem29	2.337	3.826	2.808	0.199559	1
Gm40126	1.633	3.015	2.607	0.199614	1
Nol11	6.83	6.568	0.834	0.199828	1
Usp37	4.806	5.169	1.286	0.199915	1
Gmppa	5.485	4.688	0.576	0.200109	1
Wdfy3	1.72	3.022	2.467	0.200134	1
A430005L14Rik	4.096	3.516	0.669	0.2003	1
Map7d3	3.008	2.104	0.534	0.20033	1
Brcc3	6.136	5.493	0.64	0.200458	1
Cdkn3	4.565	3.397	0.445	0.200462	1
Pmepa1	7.666	7.116	0.683	0.200708	1
Ccl22	7.755	6.161	0.331	0.200754	1
Mpv17	4.828	5.554	1.653	0.200778	1
Gemin6	1.77	2.987	2.325	0.200788	1
St3gal3	3.33	2.02	0.403	0.201117	1
Atox1	5.584	5.007	0.671	0.201257	1
Bid	5.972	6.692	1.648	0.20132	1
Spef1	2.196	1.024	0.444	0.201406	1
Snx4	4.957	5.79	1.781	0.201496	1
Alb	3.225	2.052	0.444	0.201537	1
Arhgap39	2.365	1.184	0.441	0.201573	1
Med1	6.662	6.934	1.208	0.201581	1
Higd2a	6.14	6.793	1.573	0.201753	1
Stk40	7.899	7.696	0.869	0.201825	1
Cptp	1.802	2.458	1.576	0.201917	1
Rilpl2	8.871	8.372	0.708	0.202016	1
Noct	1.374	2.583	2.312	0.202097	1
Sde2	6.756	6.638	0.922	0.202117	1
Sort1	1.565	3.232	3.177	0.202271	1
Hemgn	3.1	1.655	0.367	0.202374	1
Tacstd2	1.227	2.609	2.606	0.202376	1
Ints6l	3.862	3.06	0.574	0.202467	1
Poldip3	7.799	7.528	0.829	0.202585	1
Gpatch2l	3.596	4.441	1.796	0.202651	1
H2bc4	3.7	2.722	0.508	0.203032	1
Stk10	6.089	5.367	0.606	0.203056	1
Elavl1	7.412	6.833	0.669	0.203146	1
Abca7	5.01	5.507	1.412	0.20319	1
Pik3r1	4.981	4.216	0.589	0.203234	1
Usp5	4.36	5.312	1.935	0.203394	1
Zfp995	2.954	2.168	0.58	0.203422	1
Mapre3	3.784	2.865	0.529	0.203471	1
Pdss2	1.619	3.513	3.717	0.203572	1
Blvrb	5.61	4.768	0.558	0.203589	1
Vps37b	4.581	3.613	0.511	0.20371	1
Ints4	5.856	6.051	1.145	0.204002	1
Zcwpw1	4.431	3.188	0.423	0.204085	1
Slc23a2	3.939	4.453	1.429	0.2041	1
Anapc16	7.066	7.516	1.367	0.204202	1
Arhgap17	5.672	5.109	0.677	0.204325	1
Rasa3	4.983	4.435	0.684	0.204437	1
Atp5pb	8.343	7.96	0.767	0.204617	1
Mcm7	7.713	7.332	0.768	0.205032	1
Eno3	4.308	5.031	1.651	0.205129	1
Rhno1	5.511	5.239	0.828	0.205179	1
Rreb1	3.141	4.516	2.594	0.205195	1
Gnb4	6.567	7.287	1.647	0.205624	1
Tmem14c	6.876	7.282	1.325	0.20581	1
Nup188	5.101	4.501	0.66	0.205942	1
Exoc1	4.569	4.15	0.748	0.205946	1
Ypel2	3.512	4.6	2.126	0.205995	1
Rab27a	5.516	4.974	0.687	0.206004	1
Gm6625	2.808	1.84	0.511	0.206265	1
Clcn7	4.973	4.819	0.899	0.206284	1
Elovl1	5.408	5.814	1.325	0.206428	1
Rpl19	8.255	7.882	0.772	0.206451	1
Cflar	8.011	8.372	1.284	0.206593	1
Kif15	5.468	5.78	1.241	0.2066	1
Gm50596	2.269	3.831	2.952	0.206646	1
Crybg1	3.856	4.176	1.249	0.206672	1
Fndc3b	1.704	3.084	2.602	0.206728	1
Mysm1	4.366	4.913	1.461	0.206746	1
Tmem39a	4.718	4.271	0.734	0.206775	1
Gins3	3.65	2.701	0.518	0.206807	1
Mlh1	4.127	3.274	0.554	0.206947	1
Zfp935	1.818	3.529	3.275	0.207017	1
Ift20	7.109	6.939	0.889	0.207048	1
Nedd1	4.38	4.68	1.231	0.207062	1
Ccdc59	7.023	6.787	0.849	0.207109	1
Clcn6	1.545	3.041	2.821	0.207171	1
Rab18	6.157	5.427	0.603	0.207306	1
Snx25	4.358	3.277	0.473	0.207317	1
Ufm1	6.182	5.602	0.669	0.207475	1
Ndufs2	6.688	7.14	1.368	0.207509	1
Rnf185	5.863	6.157	1.226	0.207519	1
Gbp7	1.913	1.378	0.69	0.207556	1
Eef1d	5.738	6.535	1.738	0.207668	1
Polr3k	4.029	5.009	1.972	0.207838	1
B3gat3	3.632	4.579	1.929	0.207891	1
Chchd6	4.913	3.726	0.439	0.20801	1
Twf2	5.002	5.426	1.341	0.208045	1
Nfu1	7.507	7.281	0.855	0.20818	1
Snord68	3.32	2.022	0.407	0.208306	1
Carmil3	1.676	2.813	2.2	0.208357	1
Srpk2	5.548	6.205	1.577	0.208434	1
Nutf2	3.57	2.344	0.428	0.208463	1
Atp2a3	4.212	5.066	1.808	0.208726	1
Klhl25	3.344	2.338	0.498	0.208763	1
Prkar1a	8.833	8.936	1.074	0.208924	1
Ankmy2	4.397	3.753	0.64	0.208945	1
Vim	7.529	8.135	1.522	0.208978	1
Nploc4	7.026	7.294	1.203	0.20912	1
Atp6v1b2	7.16	7.771	1.528	0.209254	1
Timp2	2.01	2.848	1.787	0.209311	1
Apbb1ip	6.256	4.947	0.404	0.209526	1
Eogt	2.333	4.106	3.416	0.209575	1
Adamts14	2.553	1.185	0.387	0.209631	1
Cdadc1	4.255	5.005	1.681	0.20966	1
Gid8	5.857	6.377	1.434	0.209754	1
Csde1	9.529	9.374	0.898	0.209769	1
Nsl1	2.683	2.077	0.657	0.209986	1
Gm14230	3.546	4.339	1.732	0.210032	1
Ifnar1	4.5	5.033	1.447	0.210068	1
Abcg1	6.401	6.139	0.834	0.210095	1
Tk2	4.612	4.013	0.66	0.210145	1
Ywhaz	7.215	7.508	1.225	0.210179	1
Fmr1	5.221	4.638	0.667	0.210218	1
Sufu	5.396	4.724	0.628	0.210364	1
Acvr2b	2.066	2.604	1.452	0.210396	1
Fahd1	3.681	3.317	0.777	0.210488	1
Ifi35	4.497	4.905	1.327	0.210599	1
Selenot	5.577	5.336	0.846	0.210661	1
Lamc1	4.589	4.913	1.252	0.210747	1
Cd38	2.684	3.49	1.748	0.210845	1
Tra2b	7.969	8.138	1.124	0.210988	1
Stx2	3.2	3.976	1.713	0.211048	1
Tm9sf3	6.981	7.324	1.269	0.211224	1
Nsun3	4.542	3.768	0.585	0.211233	1
Lmbrd1	5.834	4.638	0.436	0.211261	1
Gm24507	2.226	2.983	1.689	0.211355	1
Racgap1	6.36	6.138	0.858	0.211414	1
Mfsd1	6.868	8.037	2.249	0.211629	1
Acsl5	5.736	4.849	0.541	0.211698	1
Acta1	1.92	2.694	1.711	0.211722	1
Sgsh	2.24	4.405	4.482	0.211743	1
Fam234b	3.356	2.293	0.479	0.211765	1
Polr3g	4.222	3.07	0.45	0.211784	1
Melk	2.824	4.181	2.562	0.2118	1
Zbtb4	5.242	4.166	0.474	0.211884	1
Tmem70	4.391	5.595	2.304	0.211902	1
Mrpl17	5.763	5.123	0.642	0.211993	1
Gm38733	2.843	1.926	0.53	0.212015	1
Ndufc2	8.855	9.183	1.255	0.212096	1
Pggt1b	5.982	5.551	0.742	0.212316	1
Glmp	5.54	6.036	1.411	0.212328	1
Mybpc3	2.574	3.509	1.911	0.212331	1
Tuba4a	4.636	5.689	2.074	0.212354	1
Wdr3	5.788	6.429	1.56	0.21259	1
Dusp14	2.37	1.08	0.409	0.21271	1
Gla	1.485	3.386	3.733	0.212971	1
Gm34095	3.95	2.84	0.463	0.212974	1
Irf9	4.713	5.334	1.538	0.213003	1
Rapgef6	7.118	6.826	0.817	0.213171	1
Cox18	2.219	3.738	2.865	0.213324	1
Exosc1	5.416	5.696	1.214	0.213355	1
Pigq	5.273	5.768	1.409	0.213618	1
Zbtb46	5.394	5.839	1.361	0.213808	1
Gle1	4.534	5.257	1.651	0.213854	1
Cutc	4.296	3.67	0.648	0.213941	1
Sarnp	6.405	5.99	0.75	0.21414	1
Arpc1a	5.745	6.441	1.619	0.214148	1
Slc25a39	7.481	7.64	1.116	0.214185	1
Pinx1	6.055	6.255	1.148	0.214235	1
Pttg1	4.371	5.346	1.966	0.214285	1
Exoc3	6.246	6.462	1.161	0.214328	1
Bub1b	6.072	5.614	0.728	0.214428	1
Med13	6.773	6.254	0.698	0.214465	1
Arl6ip1	7.92	8.52	1.516	0.214471	1
Pex19	5.436	5.069	0.775	0.214578	1
Dnaja2	8.714	9.021	1.237	0.214724	1
Psmb8	7.242	6.869	0.772	0.214741	1
Rnf169	6.387	6.642	1.193	0.214775	1
Mrs2	5.142	4.339	0.573	0.214786	1
Actn4	8.041	7.292	0.595	0.214995	1
Pitpnm2	4.169	3.432	0.6	0.215051	1
Nat10	3.989	4.829	1.791	0.215115	1
Map3k4	4.743	4.991	1.188	0.215296	1
Def6	6.158	5.426	0.602	0.21551	1
Abhd8	3.975	3.392	0.667	0.215631	1
Zer1	5.063	3.643	0.374	0.215633	1
Bcl9l	6.723	5.597	0.458	0.215663	1
Ddx5	9.148	9.012	0.91	0.215712	1
Lima1	3.161	2.062	0.467	0.215808	1
Srsf5	6.542	6.401	0.907	0.21587	1
Smg9	5.172	4.357	0.569	0.215912	1
Gm26917	16.283	16.685	1.321	0.215925	1
Pomt2	1.104	3.413	4.956	0.215947	1
Kif9	2.657	3.481	1.77	0.216111	1
Prkra	3.142	3.677	1.449	0.216168	1
Acsl4	6.51	6.005	0.705	0.216337	1
Nt5c3	5.36	4.516	0.557	0.216414	1
S100a13	5.506	5.911	1.324	0.216417	1
Arsa	4.302	4.728	1.343	0.216517	1
Afmid	6.193	5.689	0.705	0.216594	1
Rpl10	7.836	8.032	1.146	0.216659	1
Cd93	4.394	3.062	0.397	0.216683	1
Kidins220	5.249	5.946	1.621	0.216727	1
Fbrs	7.022	6.584	0.738	0.217112	1
Pprc1	2.612	3.806	2.288	0.217128	1
Galns	3.355	4.073	1.645	0.217252	1
Tbl1xr1	5.134	4.839	0.815	0.217275	1
Dda1	5.809	5.131	0.625	0.217298	1
Trappc4	6.809	6.165	0.64	0.217328	1
Zfp267	4.692	3.434	0.418	0.217453	1
Ndufa2	8.01	8.369	1.283	0.217636	1
Mtfr1l	5.209	6.059	1.802	0.217765	1
Coq9	5.038	4.17	0.548	0.217778	1
Acot2	10.042	9.175	0.548	0.217847	1
Afg3l1	6.317	6.62	1.234	0.217909	1
Prkab2	1.521	3.393	3.66	0.217968	1
Rsbn1l	5.943	5.756	0.879	0.217988	1
St6galnac3	2.049	1.558	0.711	0.218172	1
Coro1a	8.386	8.501	1.082	0.218226	1
Cnot3	7.242	6.792	0.732	0.218235	1
St14	2.699	1.105	0.331	0.218636	1
Exosc9	5.696	6.163	1.383	0.218682	1
Cyrib	7.631	8.215	1.499	0.218705	1
Arl5c	5.928	4.981	0.519	0.218751	1
Wdr41	3.513	3.092	0.747	0.218793	1
Wipi1	3.021	2.622	0.758	0.218794	1
Ltb	5.435	4.441	0.502	0.21886	1
Tmem131	4.312	3.509	0.573	0.218925	1
Mrps6	6.36	6.25	0.927	0.218958	1
Pex7	3.406	1.575	0.281	0.21928	1
Rab10os	2.764	1.227	0.345	0.219379	1
Blmh	6.874	7.45	1.492	0.219402	1
Nmt2	5.187	6.055	1.825	0.219528	1
Ipo4	5.27	4.71	0.678	0.219569	1
Limd2	9.69	9.307	0.767	0.219584	1
Mdn1	6.287	6.724	1.354	0.219631	1
Fnbp1l	3.798	4.328	1.444	0.219652	1
Mib2	6.901	7.074	1.128	0.219719	1
Cry1	5.123	4.724	0.758	0.219749	1
Tmx2	6.026	5.948	0.947	0.219936	1
Smco4	5.133	3.778	0.391	0.219938	1
Gbp8	4.685	5.26	1.49	0.219973	1
Ndufb9	6.923	6.458	0.725	0.220087	1
Cenpl	4.399	2.779	0.325	0.220167	1
Jakmip1	4.564	3.799	0.588	0.220167	1
Rnasel	3.114	3.951	1.786	0.220615	1
Fam117b	4.41	4.912	1.416	0.220724	1
Cox6a1	9.104	8.997	0.929	0.220791	1
Srrm1	8.775	8.553	0.857	0.220893	1
Usp38	5.503	3.27	0.213	0.221096	1
Immp1l	4.079	4.481	1.321	0.221134	1
Fbxo31	4.221	2.956	0.416	0.221371	1
Ogfod3	3.816	2.643	0.443	0.221467	1
Afap1	2.716	3.311	1.51	0.221564	1
Atp5j2	8.041	7.786	0.838	0.221573	1
Ndufb11	6.99	6.373	0.652	0.221743	1
Ptma-ps2	2.659	1.066	0.332	0.221841	1
Mink1	1.256	2.83	2.978	0.221853	1
Msl3	5.999	5.77	0.853	0.221922	1
Eral1	4.013	4.501	1.403	0.22194	1
Cds2	5.092	5.499	1.326	0.222235	1
Col11a2	2.474	3.832	2.563	0.22228	1
Mrnip	3.673	2.621	0.482	0.222456	1
Btg2	5.216	4.447	0.587	0.22247	1
Unc119b	3.982	4.505	1.437	0.222915	1
Prkar2a	6.154	5.996	0.896	0.222945	1
Slc39a4	4.146	4.954	1.751	0.223276	1
n-TGgcc6	2.297	1.107	0.438	0.223434	1
Cep44	4.413	3.113	0.406	0.22344	1
Srgap3	1.8	3.2	2.639	0.223569	1
Gtf2a2	5.669	6.056	1.308	0.223579	1
Oaz2	5.136	5.876	1.671	0.223597	1
Zfp518a	3.466	3.806	1.265	0.223671	1
Klc4	4.403	4.987	1.499	0.223718	1
Rad23a	5.571	5.927	1.28	0.223773	1
Pomp	6.855	7.83	1.965	0.223779	1
Dock2	8.185	8.133	0.965	0.223783	1
Lcorl	5.053	6.152	2.142	0.223842	1
[truncated: 8,728 more rows]

## Sheet: Table S2-3.
Table S2-3. Gene Ontology (GO) enrichment analysis of differentially expressed genes (DEGs) in OSMI-1–treated and siOCA-B–transfected B cells. (Normalized data ≥1.0)
List of GO enrichment analysis for differentially expressed genes in OSMI-1–treated B cells.(vs. DMSO)
GO ID	Category	Term	Regulated genes	Gene list
GO:0006955	Biological Process	Immune response	Up	Abcc1, Akap8, Arid5a, Ccl22, Ccr7, Cst7, Cxcr5, Cyba, Exosc3, Fas, Fau, Gpr183, Grn, Gsn, Icam1, Igkc, Il17ra, Il5ra, Mfhas1, Mlh1, Nfkb1, Nfil3, Otulin, Polr3d, Psen2, Rftn1, Rnf19b, Rpl13a, Rpl30, Stx11, Tfe3, Tnfrsf13b, Vamp3
			Down	Aim2, Atg7, Atl2, Bcl10, Btk, Cd1d1, Csk, Ctsc, Endod1, Endou, Epsti1, Fcmr, Fyn, H2-Ob, Ifi47, Iglc1, Irf8, Irf9, Kif16b, Lax1, Lcp1, Lef1, Ltb, Myb, Myd88, Naip2, Nmb, Pdcd1lg2, Pqbp1, Prdm1, Rasgrp2, Rasgrp3, Rnase6, Rnaset2b, Syk, Tfeb, Tifa, Trim34a, Trim59, Zdhhc18
GO:0006281	Biological Process	DNA repair	Up	Cdk7, Dot1l, Ercc6l2, Mlh1, Polk, Slx1b
			Down	Brca2, Brip1, Dyrk1b, Esco2, Hmces, Hmga1, Ints3, Marf1, Mcm2, Neil1, Pagr1a, Pif1, Pwwp3a, Slf1, Smc4, Ssrp1, Uvrag, Zmynd8
GO:0030154	Biological Process	Cell differentiation	Up	Abcc1, Arid5a, B4galt5, Baiap2, Bap1, Bcl2l1, Ccr7, Cdk5rap3, Cdk7, Cd44, Cd63, Ctsb, Edf1, Ehd1, Fas, Foxp4, Glmn, Gpr183, Grn, Icam1, Igkc, Il5ra, Lats1, Maea, Mfhas1, Mlh1, Mreg, Nfil3, Pde1b, Pebp1, Pelo, Ppia, Prkca, Psen2, Selenow, Sh3rf1, Sod1, Sulf2, Tacc2, Tdrd7, Thap11, Tnfrsf13b, Tusc2, Ugcg, Ulk2, Wars2, Znhit1
			Down	Abi3, Ablim1, Acin1, Adgrg1, Akap13, Akna, Arid1a, Atg7, Atxn2, Bcl9l, Brca2, Brip1, Btk, C1galt1, Cd1d1, Cnp, Csk, Csrp2, Ddit4, Dpysl2, Dusp10, Dusp6, Dyrk1b, Ehmt2, Enpp1, Epsti1, Esco2, Ets1, Ezr, Fam83d, Fech, Foxo1, Fyn, Fzd5, Git1, Hdac5, Hexa, Hmga1, Ikzf1, Irf8, Irf9, Itga6, Lef1, Ly6d, Lyl1, Marf1, Mbnl1, Mef2d, Mknk2, Mtf2, Myb, Myd88, Nif3l1, Pacsin1, Patz1, Pcnt, Pex11a, Pick1, Plxnb…
GO:0008219	Biological Process	Cell death	Up	Abcc1, Aen, Bap1, Bcl2l1, Birc2, Brms1, Cdk5rap3, Ctsb, Dnm1l, Ei24, Fas, Ghitm, Gsn, Ikbkg, Mdm2, Mlh1, Mybbp1a, Nfkb1, Noc2l, Pdcd2, Pim2, Ppia, Prkca, Traf1
			Down	Acin1, Aim2, Api5, Atp2a3, Bcl10, Birc5, Brca2, Btk, Bub1, Ctsc, Ddit4, Dedd2, Dnase2a, E2f2, Enpp1, Foxo1, Fzd5, G2e3, Hip1r, Hmga1, Inppl1, Lef1, Mcm2, Mef2d, Mknk2, Myd88, Naip2, Nradd, Pten, Relt, Shisa5, Stk24, Stk26, Syk, Tfdp1, Tnfaip8, Trp53inp1
GO:0007049	Biological Process	Cell cycle	Up	Abraxas2, Akap8, Arf1, Bap1, Cdk5rap3, Chmp2a, Ciao1, Clasp1, Lats1, Lsm14a, Mlh1, Pim2, Ppp2r5d, Tacc2, Vps4a
			Down	Anp32b, Brca2, Brip1, Bub1, Bub3, Birc5, Cdca8, Ehmt2, Esco2, Ezr, Fam83d, Gem, Inppl1, Ints3, Iqgap2, Kat2b, Kif14, Kif15, Kifc1, Knl1, Marf1, Mcm2, Mki67, Myb, Pcnt, Pten, Rhoa, Sgo1, Smc4, Tacc3, Top2b, Tubb2b, Ube2c, Uvrag
GO:0006915	Biological Process	Apoptotic process	Up	Abcc1, Aen, Bap1, Bcl2l1, Birc2, Brms1, Cdk5rap3, Ctsb, Dnm1l, Ei24, Fas, Ghitm, Gsn, Ikbkg, Mdm2, Mlh1, Mybbp1a, Nfkb1, Noc2l, Pdcd2, Pim2, Ppia, Prkca, Traf1
			Down	Acin1, Aim2, Api5, Atp2a3, Bcl10, Birc5, Brca2, Btk, Bub1, Ctsc, Ddit4, Dedd2, Dnase2a, E2f2, Enpp1, Foxo1, Fzd5, G2e3, Hip1r, Hmga1, Inppl1, Lef1, Mcm2, Mef2d, Mknk2, Myd88, Naip2, Nradd, Pten, Relt, Shisa5, Stk24, Stk26, Syk, Tfdp1, Tnfaip8, Trp53inp1
List of GO enrichment analysis for differentially expressed genes in siOCA-B–transfected B cells.(vs. siNC)
GO ID	Category	Term	Regulated genes	Gene list
GO:0006955	Biological Process	Immune response	Up	Actr3, Lgals8, S100a9, Tlr12, Trim11
			Down	Ass1, Bcl3, Cd79a, Cnpy3, Cr2, Fas, H2-Dma, Ighe, Irf8, Lcp1, Nbn1, Ndufs4, Pou2af1, Rnf170, Serinc5, Unc93b1
GO:0006281	Biological Process	DNA repair	Up	Cdk9, Nsmce4a, Xrn2
			Down	Faap24, Mcm4, Nbn, Nme3, Wdr48, Wrap53
GO:0030154	Biological Process	Cell differentiation	Up	Actr3, Anxa4, Bloc1s1, Cep85, Ehbp1l1, Ifrd1, Il11ra1, Kctd11, Lgals8, Mast2, Plod3, Ppp2r3a, Ptpn11, Raf1, S100a9, Smad2, Snx19, Tarbp2, Tubb2a, Wwox, Xrn2
			Down	Abcb10, Acsl3, Arid1b, Basp1, Bcl3, Cav1, Ccn2, Cd79a, Cnn2, Cr2, Dhfr, Eif2b3, Fas, Flt3, Fndc3a, Foxn2, Glo1, Grk2, H2-DMa, Ighe, Irf8, Klf2, Klf4, Ly6d, Mpzl2, Ncaph, Ndufs4, Plekho1, Pou2af1, Raph1, Rock1, Sav1, Spib, Stim1, Tcea1, Tnk2, Twsg1, Txnip, Yif1b, Zfp36l1, Zfp800
GO:0008219	Biological Process	Cell death	Up	Ing4, Mydgf, Raf1, Rraga, S100a9, Spata2, Topors, Wwox, Zfand6, Zfp369
			Down	Bcl3, Cav1, Fas, G2e3, Nbn, Ndufs4, Noc2l, Pdcd7, Rock1, Sav1, Zfp36l1
GO:0007049	Biological Process	Cell cycle	Up	Actr3, Cep85, Cntin, Tubb2a
			Down	Cenatac, Chmp7, Mcm4, Mki67, Nbn, Ncapg, Ncaph, Ppm1d, Reep3, Rock1, Snx18
GO:0006915	Biological Process	Apoptotic process	Up	Ing4, Mydgf, Raf1, Rraga, S100a9, Spata2, Topors, Wwox, Zfand6, Zfp369
			Down	Bcl3, Cav1, Fas, G2e3, Nbn, Ndufs4, Noc2l, Pdcd7, Rock1, Sav1, Zfp36l1
	DEGs were defined as genes with Log2 FC≥1.3 and p < 0.05. P-values were calculated using the Welch's t-test.

## Sheet: Table S2-4.
Table S2-4. B cell program–focused Gene Ontology (GO) enrichment analysis of differentially expressed genes (DEGs) in OSMI-1–treated and siOCA-B–transfected B cells. (Normalized data ≥1.0)
List of B cell program–focused GO enrichment analysis for differentially expressed genes in OSMI-1–treated B cells.(vs. DMSO)
GO ID	Category	Term	Regulated genes	Gene list
GO:0016445	Biological Process	Somatic hypermutation of immunoglobulin genes	Up	Mlh1
GO:0002315			Down	Hmces
GO:0045190	Biological Process	Plasma cell differentiation	Up
GO:0002313			Down	Enpp1
GO:0042100	Biological Process	Isotype switching	Up	Exosc3, Mlh1
GO:0030183			Down
GO:0001783	Biological Process	Germinal center B cell differentiation	Up
GO:0042113			Down	Irf8
GO:0016445	Biological Process	B cell proliferation	Up
GO:0002315			Down	Lef1
GO:0045190	Biological Process	B cell differentiation	Up	Gpr183, Igkc
GO:0002313			Down	Btk, Enpp1, Hdac5, Hmga1, Ikzf1, Irf8, Lyl1, Myb, Pou2f2, Smc4, Tcf3, Top2b
GO:0042100	Biological Process	B cell apoptotic process	Up
GO:0030183			Down	Bcl10
GO:0001783	Biological Process	B cell activation	Up	Cxcr5, Exosc3, Gpr183, Igkc, Mlh1
GO:0042113			Down	Btk, Enpp1, Hdac5, Hmga1, Ikzf1, Irf8, Lax1, Lef1, Lyl1, Myb, Pfdn1, Pou2f2, Smc4, Tcf3, Top2b
List of B cell program–focused GO enrichment analysis for differentially expressed genes in siOCA-B–transfected B cells.(vs. siNC)
GO ID	Category	Term	Regulated genes	Gene list
GO:0016445	Biological Process	Somatic hypermutation of immunoglobulin genes	Up
GO:0002315			Down
GO:0045190	Biological Process	Plasma cell differentiation	Up	Lgals8
GO:0002313			Down
GO:0042100	Biological Process	Isotype switching	Up
GO:0030183			Down	Nbn
GO:0001783	Biological Process	Germinal center B cell differentiation	Up
GO:0042113			Down	Irf8, Pou2af1
GO:0016445	Biological Process	B cell proliferation	Up
GO:0002315			Down	CD79a, Cr2
GO:0045190	Biological Process	B cell differentiation	Up	Lgals8
GO:0002313			Down	Bcl3, CD79a, Cr2, Flt3, Irf8, Ncaph, Pou2af1, Spib
GO:0042100	Biological Process	B cell apoptotic process	Up
GO:0030183			Down
GO:0001783	Biological Process	B cell activation	Up	Lgals8
GO:0042113			Down	Bcl3, CD79a, Cr2, Flt3, Ighe, Irf8, Nbn, Ncaph, Pou2af1, Spib
	DEGs were defined as genes with Log2 FC≥1.3 and p < 0.05. P-values were calculated using the Welch's t-test.
