# Supplementary material
Source: Research Square preprint supplement (doi:10.21203/rs.3.rs-8924149/v1)
Supplement: Supplementary file 5 [file e4242c26a931845ffdf068e8.xlsx]

## Sheet: Table S1.
Table S1. Primer lists used in this study
Sequence of RT-qPCR primer
Name	Type	Sequence (5' → 3')
β-actin	For for mouse β-actin	GGTTGTCTCCTGCGACTTC
	Rev for mouse β-actin	GGTGGTCCAGGGTTTCTTAC
Gapdh	For for mouse Gapdh	ATGTTCCAGTATGACTCCACTCACG
	Rev for mouse Gapdh	GAAGACACCAGTAGACTCCACGACA
JH2	For for Post-CSR IgH genes	CTACTTTGACTACTGGGGCCA A
IμF	For for unswitched IgM	CTCTGGCCCTGCTTATTGTTG
CμR	Rev for unswitched IgM	GAAGACATTTGGGAAGGACTGACT
Iγ1F	For for Germline IgG1	GGCCCTTCCAGATCTTTGAG
Cγ1R	Rev for Germline and Post-CSR IgG1	GGATCCAGAGTTCCAGGTCACT
IεF	For for Germline IgE	TGGGATCAGACGATGGAGAATAG
CεR	Rev for Germline and Post-CSR IgE	CCAGGGTCATGGAAGCAGTG
IαF	For for Germline IgA	CCTGGCTGTTCCCCTATGAA
CαR	Rev for Germline and Post-CSR IgA	GAGCTCGTGGGAGTGTCAGTG
Pou2f1(OCT-1)	For for mouse Pou2f1(OCT-1)	CATTAGGGCTGGGCTGAGAG
	Rev for mouse Pou2f1(OCT-1)	CTGCTTCCTCAGCAGTCACA
Pou2af1(OCA-B)	For for mouse Pou2af1(OCA-B)	GTGTTCGAGTCAAGGAGCCAGT
	Rev for mouse Pou2af1(OCA-B)	GCAGAAACCTCCATGTCAAGGC
OCA-B-FLAG	For for OCA-B-FLAG	CACGTACGAGCTCAACCACA
	REV for OCA-B-FLAG	TCCAGGATATCATTTGCTGCCA
Ccna2(Cyclin A2)	For for mouse Ccna2(Cyclin A2)	CTCAAGACTCGACGGGTT
	Rev for mouse Ccna2(Cyclin A2)	CTCCATTTCCCTAAGGTACG
Ccnd2(CyclinD2)	For for mouse Ccnd2(Cyclin D2)	GGACATCCAACCGTACATG
	Rev for mouse Ccnd2(Cyclin D2)	GAAAGACCTCTTCTTCACAC
Lef1	For for mouse Lef1	ACTGTCAGGCGACACTTCCATG
	Rev for mouse Lef1	GTGCTCCTGTTTGACCTGAGGT
Prdm1(BLIMP1)	For for mouse Prdm1(BLIMP1)	AAGACGTTCGGTCAGCTCTCCA
	Rev for mouse Prdm1(BLIMP1)	CTGGCACTCATGTGGCTTCTCT
Irf4	For for mouse Irf4	GAACGAGGAGAAGAGCGTCTTC
	Rev for mouse Irf4	GTAGGAGGATCTGGCTTGTCGA
Bcl6	For for mouse Bcl6	CAGAGATGTGCCTCCATACTGC
	Rev for mouse Bcl6	CTCCTCAGAGAAACGGCAGTCA
Aicda(AID)	For for mouse Aicda(AID)	TCTGCTACGTGGTGAAGAGGAG
	Rev for mouse Aicda(AID)	CCAGTCTGAGATGTAGCGTAGG
Sdc1(CD138)	For for mouse Sdc1(CD138)	CCTGAAGATCAGGATGGCTCTG
	Rev for mouse Sdc1(CD138)	CTTCCAAGTGGAAGGTGTCTGC
Sequence of ChIP-qPCR primer
Name	Type	Sequence (5' → 3')
IGHV1-74 promoter	For	TCAGAGGATTTGCATATTCATGAGC
	Rev	CCAGCAGGAGTAGGTGTTCA
β-actin promoter	For	AGGCATGGAGTCCTGTGGTATC
	Rev	AGCCACAGGTCCTAAGGCCAG
