# Supplementary material
Source: Research Square preprint supplement (doi:10.21203/rs.3.rs-8924149/v1)
Supplement: Supplementary file 6 [file ea9543768de1399556ce5c4b.xlsx]

## Sheet: Fig. 1.
Naive B cell (CD43- CD11b-)
CD40L/IL-4/IL-21
Fig. 1A.		Treatment	Drug	β-actin	O-GlcNAC(RL2)			Treatment	Drug	O-GlcNAc(RL2)/β-actin	Normalized to +Cytokine DMSO		Protein	Treatment	Drug	O-GlcNAc(RL2)		Fig. 1B.		Treatment	Drug	IgM	IgG1		ELISA	Treatment	Drug	IgM	IgG1
	Expt.1	-Cytokine	DMSO	0.317	1.23		Expt.1	-Cytokine	DMSO	3.88013	0.712532		Mean	-Cytokine	DMSO	0.975153			Expt.1	-Cytokine	DMSO	0.0448	0.02815		Mean	-Cytokine	DMSO	0.0469667	0.0290833
		+Cytokine	DMSO	0.303	1.65			+Cytokine	DMSO	5.44554	1			+Cytokine	DMSO	1				+Cytokine	DMSO	0.9232	1.0841			+Cytokine	DMSO	0.887567	1.10165
			Thiamet G	0.231	5.09				Thiamet G	22.0346	4.04636				Thiamet G	3.34662					Thiamet G	0.8411	1.0492				Thiamet G	0.795917	1.14492
			OSMI-1	0.229	0.668				OSMI-1	2.91703	0.535673				OSMI-1	0.423063					OSMI-1	0.35685	0.1219				OSMI-1	0.3134	0.12995
	Expt.2	-Cytokine	DMSO	0.366	2.28		Expt.2	-Cytokine	DMSO	6.22951	0.900535		SD	-Cytokine	DMSO	0.306812			Expt.2	-Cytokine	DMSO	0.05015	0.0313		SD	-Cytokine	DMSO	0.00281617	0.00192765
		+Cytokine	DMSO	0.279	1.93			+Cytokine	DMSO	6.91756	1			+Cytokine	DMSO	0				+Cytokine	DMSO	0.87635	1.14775			+Cytokine	DMSO	0.0315573	0.0403008
			Thiamet G	0.298	6.94				Thiamet G	23.2886	3.36659				Thiamet G	0.709934					Thiamet G	0.8305	1.1824				Thiamet G	0.069283	0.0835398
			OSMI-1	0.218	0.645				OSMI-1	2.95872	0.427711				OSMI-1	0.115005					OSMI-1	0.30635	0.15455				OSMI-1	0.0403891	0.021724
	Expt.3	-Cytokine	DMSO	0.337	2.42		Expt.3	-Cytokine	DMSO	7.18101	1.31239		T.Test (vs.+Cytokine DMSO)	-Cytokine	DMSO	0.901299			Expt.3	-Cytokine	DMSO	0.04595	0.0278		T.Test (vs.+Cytokine DMSO)	-Cytokine	DMSO	1.34112e-06	1.33073e-06
		+Cytokine	DMSO	0.318	1.74			+Cytokine	DMSO	5.4717	1			+Cytokine	DMSO					+Cytokine	DMSO	0.86315	1.0731			+Cytokine	DMSO
			Thiamet G	0.471	6.77				Thiamet G	14.3737	2.62691				Thiamet G	0.00460748					Thiamet G	0.71615	1.20315				Thiamet G	0.105412	0.464424
			OSMI-1	0.303	0.507				OSMI-1	1.67327	0.305804				OSMI-1	0.000965721					OSMI-1	0.277	0.1134				OSMI-1	4.1598e-05	3.26934e-06
								Average	-Cytokine	DMSO	0.975153
									+Cytokine	DMSO	1
										Thiamet G	3.34662
										OSMI-1	0.423063
								STDEV	-Cytokine	DMSO	0.306812
									+Cytokine	DMSO	0
										Thiamet G	0.709934
										OSMI-1	0.115005
LPS
Fig. 1C.		Treatment	Drug	β-actin	O-GlcNAC(RL2)			Treatment	Drug	O-GlcNAc(RL2)/β-actin	Normalized to DMSO		Protein	Treatment	Drug	O-GlcNAc(RL2)		Fig. 1D.		Treatment	Drug	IgM		ELISA	Treatment	Drug	IgM
	Expt.1	+Cytokine	DMSO	7.25	0.578		Expt.1	+Cytokine	DMSO	0.0797241	1		Mean	+Cytokine	DMSO	1			Expt.1	+Cytokine	DMSO	1.023		Mean	+Cytokine	DMSO	0.945667
			Thiamet G	7.29	0.773				Thiamet G	0.106036	1.33003				Thiamet G	2.24961					Thiamet G	0.733				Thiamet G	0.764667
			OSMI-1	6.78	0.0798				OSMI-1	0.0117699	0.147633				OSMI-1	0.278338					OSMI-1	0.14				OSMI-1	0.144
	Expt.2	+Cytokine	DMSO	8.03	0.323		Expt.2	+Cytokine	DMSO	0.0402242	1		SD	+Cytokine	DMSO	0			Expt.2	+Cytokine	DMSO	0.603		SD	+Cytokine	DMSO	0.31129
			Thiamet G	7.67	0.754				Thiamet G	0.0983051	2.44393				Thiamet G	0.839452					Thiamet G	0.541				Thiamet G	0.241065
			OSMI-1	5.59	0.0894				OSMI-1	0.0159928	0.397593				OSMI-1	0.125373					OSMI-1	0.123				OSMI-1	0.0232594
	Expt.3	+Cytokine	DMSO	10.4	0.352		Expt.3	+Cytokine	DMSO	0.0338462	1		T.Test(vs. DMSO)	+Cytokine	DMSO				Expt.3	+Cytokine	DMSO	1.211		T.Test(vs. DMSO)	+Cytokine	DMSO
			Thiamet G	8.73	0.879				Thiamet G	0.100687	2.97485				Thiamet G	0.0614361					Thiamet G	1.02				Thiamet G	0.470466
			OSMI-1	6.78	0.0665				OSMI-1	0.00980826	0.289789				OSMI-1	0.000568601					OSMI-1	0.169				OSMI-1	0.0112627
								Average	+Cytokine	DMSO	1
										Thiamet G	2.24961
										OSMI-1	0.278338
								STEDV	+Cytokine	DMSO	0
										Thiamet G	0.839452
										OSMI-1	0.125373
LPS/TGF-β
Fig. 1E.		Treatment	Drug	β-actin	O-GlcNAC(RL2)			Treatment	Drug	O-GlcNAc(RL2)/β-actin	Normalized to DMSO		Protein	Treatment	Drug	O-GlcNAc(RL2)		Fig. 1F.		Treatment	Drug	IgM	IgA		Protein	Treatment	Drug	IgM	IgA
	Expt.1	+Cytokine	DMSO	6.89	0.376		Expt.1	+Cytokine	DMSO	0.0545718	1		Mean	+Cytokine	DMSO	1			Expt.1	+Cytokine	DMSO	1.326	0.4539		Mean	+Cytokine	DMSO	1.26367	0.475867
			Thiamet G	5.96	0.511				Thiamet G	0.0857383	1.57111				Thiamet G	1.60734					Thiamet G	1.074	0.4162				Thiamet G	0.939	0.4321
			OSMI-1	4.86	0.166				OSMI-1	0.0341564	0.625897				OSMI-1	0.428002					OSMI-1	0.236	0.2327				OSMI-1	0.234	0.218
	Expt.2	+Cytokine	DMSO	9.95	0.234		Expt.2	+Cytokine	DMSO	0.0235176	1		SD	+Cytokine	DMSO	0			Expt.2	+Cytokine	DMSO	1.009	0.491		SD	+Cytokine	DMSO	0.229927	0.0194711
			Thiamet G	8.03	0.336				Thiamet G	0.0418431	1.77923				Thiamet G	0.156933					Thiamet G	0.658	0.4877				Thiamet G	0.243415	0.0495997
			OSMI-1	7.67	0.0668				OSMI-1	0.00870926	0.37033				OSMI-1	0.176283					OSMI-1	0.23	0.2591				OSMI-1	0.0034641	0.0500946
	Expt.3	+Cytokine	DMSO	7.57	0.571		Expt.3	+Cytokine	DMSO	0.0754293	1		T.Test (vs. DMSO)	+Cytokine	DMSO				Expt.3	+Cytokine	DMSO	1.456	0.4827		T.Test (vs. DMSO)	+Cytokine	DMSO
			Thiamet G	6.54	0.726				Thiamet G	0.111009	1.4717				Thiamet G	0.00257747					Thiamet G	1.085	0.3924				Thiamet G	0.168367	0.227911
			OSMI-1	5.39	0.117				OSMI-1	0.0217069	0.287778				OSMI-1	0.00492777					OSMI-1	0.236	0.1622				OSMI-1	0.00148941	0.00114524
								Average	+Cytokine	DMSO	1
										Thiamet G	1.60734
										OSMI-1	0.428002
								STEDV	+Cytokine	DMSO	0
										Thiamet G	0.156933
										OSMI-1	0.176283

## Sheet: Fig. 2.
Naive B cell (CD43- CD11b-)
CD40L/IL-4/IL-21
Fig. 2A.		Treatment	Drug	Cell number (x106 cells/ml)			Treatment	Drug	Cell number (x106 cells/ml)		Fig. 2B.		Treatment	Drug	β-actin	c-Myc			Treatment	Drug	c-Myc/β-actin	Normalized to -Cytokine DMSO		Protein	Treatment	Drug	c-Myc
	Expt.1	-Cytokine	DMSO	1		Mean	-Cytokine	DMSO	1			Expt.1	-Cytokine	DMSO	0.317	0.0348		Expt.1	-Cytokine	DMSO	0.109779	1		Mean	-Cytokine	DMSO	1
		+Cytokine	DMSO	5.54			+Cytokine	DMSO	5.27333				+Cytokine	DMSO	0.303	0.13			+Cytokine	DMSO	0.429043	3.90824			+Cytokine	DMSO	3.25863
			Thiamet G	6.58				Thiamet G	5.29333					Thiamet G	0.231	0.121				Thiamet G	0.52381	4.77148				Thiamet G	3.26009
			OSMI-1	1.63				OSMI-1	1.22333					OSMI-1	0.229	0.0236				OSMI-1	0.103057	0.938764				OSMI-1	0.926555
	Expt.2	-Cytokine	DMSO	1		SD	-Cytokine	DMSO	0			Expt.2	-Cytokine	DMSO	0.366	0.0722		Expt.2	-Cytokine	DMSO	0.197268	1		SD	-Cytokine	DMSO	0
		+Cytokine	DMSO	4.69			+Cytokine	DMSO	0.5058				+Cytokine	DMSO	0.279	0.184			+Cytokine	DMSO	0.659498	3.34316			+Cytokine	DMSO	0.695732
			Thiamet G	4.41				Thiamet G	1.13984					Thiamet G	0.298	0.198				Thiamet G	0.66443	3.36816				Thiamet G	1.56822
			OSMI-1	1.02				OSMI-1	0.352184					OSMI-1	0.218	0.0512				OSMI-1	0.234862	1.19058				OSMI-1	0.270333
	Expt.3	-Cytokine	DMSO	1		T.Test (vs.+Cytokine DMSO)	-Cytokine	DMSO	0.00463738			Expt.3	-Cytokine	DMSO	0.337	0.0785		Expt.3	-Cytokine	DMSO	0.232938	1		T.Test (vs.+Cytokine DMSO)	-Cytokine	DMSO	0.0302025
		+Cytokine	DMSO	5.59			+Cytokine	DMSO					+Cytokine	DMSO	0.318	0.187			+Cytokine	DMSO	0.58805	2.5245			+Cytokine	DMSO
			Thiamet G	4.89				Thiamet G	0.979169					Thiamet G	0.471	0.18				Thiamet G	0.382166	1.64063				Thiamet G	0.998893
			OSMI-1	1.02				OSMI-1	0.000339879					OSMI-1	0.303	0.0459				OSMI-1	0.151485	0.650325				OSMI-1	0.00564834
	Average	-Cytokine	DMSO	1															Average	-Cytokine	DMSO	1
		+Cytokine	DMSO	5.27333																+Cytokine	DMSO	3.25863
			Thiamet G	5.29333																	Thiamet G	3.26009
			OSMI-1	1.22333																	OSMI-1	0.926555
	STDEV	-Cytokine	DMSO	0															STDEV	-Cytokine	DMSO	0
		+Cytokine	DMSO	0.5058																+Cytokine	DMSO	0.695732
			Thiamet G	1.13984																	Thiamet G	1.56822
			OSMI-1	0.352184																	OSMI-1	0.270333
Fig. 2D, 2F-J and 2L-M		mean Cq	Gapdh	Ccna2	Germline IgG1	Post-CSR IgG1	IgM	Germline IgE	Post-CSR IgE	Prdm1	Aicda			ΔCq	Ccna2	Germline IgG1	Post-CSR IgG1	IgM	Germline IgE	Post-CSR IgE	Prdm1	Aicda			ΔCq expression	Ccna2	Germline IgG1	Post-CSR IgG1	IgM	Germline IgE	Post-CSR IgE	Prdm1	Aicda			ΔΔCq	Ccna2	Germline IgG1	Post-CSR IgG1	IgM	Germline IgE	Post-CSR IgE	Prdm1	Aicda			Treatment	Drug	Ccna2
	-Cytokine	DMSO-1	22.11	28.988	29.2235	28.2431	24.3314	31.5432	27.5436	28.775	28.7884		-Cytokine	DMSO-1	6.87799	7.11353	6.13314	2.22139	9.43317	5.43362	6.66504	6.67839		-Cytokine	DMSO-1	0.00850194	0.00722129	0.0142476	0.214435	0.00144655	0.0231376	0.00985422	0.00976348		-Cytokine	DMSO-1	1	1	1	1	1	1	1	1		Mean	-Cytokine	DMSO	0.662296
		DMSO-2	21.47	29.46	29.4337	28.0432	24.1921	32.0322	27.5572	28.6918	27.6263			DMSO-2	7.99001	7.96373	6.57323	2.72208	10.5622	6.08718	7.22177	6.15631			DMSO-2	0.0039334	0.0040057	0.0105017	0.151555	0.000661404	0.0147088	0.0066993	0.0140206			DMSO-2	0.462648	0.554707	0.737085	0.706766	0.45723	0.635709	0.67984	1.43603			+Cytokine	DMSO	18.5512
		DMSO-3	21.62	29.4297	29.5058	28.4952	24.0505	32.0499	27.6619	28.7048	28.0799			DMSO-3	7.80969	7.88577	6.87522	2.43046	10.4299	6.04192	7.08484	6.4599			DMSO-3	0.00445706	0.00422811	0.00851829	0.185506	0.000724925	0.0151775	0.00736633	0.0113599			DMSO-3	0.524241	0.585507	0.597875	0.865091	0.501142	0.655968	0.747531	1.16351				Thiamet G	18.6502
	+Cytokine	DMSO-1	20.295	23.2196	20.7498	22.3449	21.4328	29.9324	24.3375	22.9434	24.8245		+Cytokine	DMSO-1	2.92461	0.454844	2.04992	1.13775	9.63741	4.04253	2.64845	4.52952		+Cytokine	DMSO-1	0.131706	0.729589	0.241497	0.454467	0.0012556	0.0606844	0.159492	0.0432992		+Cytokine	DMSO-1	15.4912	101.033	16.95	2.11937	0.867999	2.62276	16.1851	4.43481				OSMI-1	2.56953
		DMSO-2	19.55	22.0139	20.7153	21.2414	21.143	29.2821	23.7263	22.4439	24.4228			DMSO-2	2.46388	1.16529	1.69145	1.59303	9.7321	4.17627	2.89393	4.87277			DMSO-2	0.181258	0.445874	0.309616	0.331474	0.00117584	0.0553116	0.134537	0.034131			DMSO-2	21.3196	61.7444	21.7311	1.5458	0.812858	2.39055	13.6527	3.49578		SD	-Cytokine	DMSO	0.294077
		DMSO-3	19.91	22.5521	20.9634	21.6348	21.2472	29.7991	24.8971	23.2636	25.4783			DMSO-3	2.64206	1.05341	1.72484	1.33723	9.88914	4.98711	3.35358	5.56831			DMSO-3	0.160199	0.481829	0.302531	0.39578	0.00105457	0.0315304	0.09783	0.0210752			DMSO-3	18.8427	66.7234	21.2338	1.84569	0.729023	1.36273	9.92772	2.15857			+Cytokine	DMSO	2.92511
		Thiamet G-1	20.65	23.4349	20.6817	23.1783	21.3709	29.8838	24.8295	23.0124	24.9271			Thiamet G-1	2.78493	0.0317064	2.52827	0.720929	9.23385	4.17948	2.36236	4.27709			Thiamet G-1	0.145095	0.978263	0.173346	0.606707	0.00166087	0.0551887	0.194472	0.0515782			Thiamet G-1	17.0661	135.469	12.1667	2.82933	1.14816	2.38524	19.7349	5.28277				Thiamet G	5.25954
		Thiamet G-2	19.725	22.7585	20.1258	21.3338	21.3777	29.3612	24.2971	22.2653	24.0775			Thiamet G-2	3.03353	0.400772	1.60882	1.65267	9.63616	4.57208	2.54031	4.35254			Thiamet G-2	0.122128	0.757453	0.327867	0.31805	0.00125668	0.0420403	0.171906	0.0489502			Thiamet G-2	14.3648	104.892	23.0121	1.4832	0.868747	1.81697	17.4449	5.0136				OSMI-1	0.562347
		Thiamet G-3	20.07	22.3321	20.4153	22.0046	21.1151	29.34	25.0891	23.1115	24.3577			Thiamet G-3	2.26212	0.345325	1.93463	1.04507	9.27	5.01914	3.04147	4.28771			Thiamet G-3	0.208465	0.78713	0.261587	0.484622	0.00161977	0.0308382	0.121458	0.0512002			Thiamet G-3	24.5197	109.001	18.3601	2.26	1.11975	1.33282	12.3255	5.24405		T.Test (vs.+Cytokine DMSO)	-Cytokine	DMSO	0.000458408
		OSMI-1-1	20.28	26.0018	22.1268	26.923	23.2644	29.3203	28.4952	25.9518	26.0678			OSMI-1-1	5.72184	1.84676	6.64298	2.98441	9.04027	8.21519	5.67175	5.78785			OSMI-1-1	0.0189476	0.278015	0.0100061	0.126358	0.00189936	0.00336498	0.019617	0.0181002			OSMI-1-1	2.22862	38.4994	0.702298	0.58926	1.31303	0.145433	1.99072	1.85387			+Cytokine	DMSO
		OSMI-1-2	20.41	25.6016	21.8047	26.1519	23.2837	29.5029	28.2144	26.0045	25.5046			OSMI-1-2	5.19156	1.39469	5.74195	2.8737	9.09291	7.80443	5.59448	5.09463			OSMI-1-2	0.0273643	0.380328	0.0186854	0.136437	0.00183131	0.00447334	0.0206963	0.0292661			OSMI-1-2	3.21859	52.6676	1.31147	0.636261	1.26599	0.193336	2.10025	2.9975				Thiamet G	0.978632
		OSMI-1-3	20.72	26.4208	22.4431	27.0185	24.0826	29.4439	28.9166	26.439	26.0472			OSMI-1-3	5.7008	1.72311	6.29848	3.36258	8.72387	8.19664	5.71904	5.32724			OSMI-1-3	0.019226	0.302895	0.0127048	0.0972214	0.00236513	0.00340853	0.0189845	0.0249082			OSMI-1-3	2.26137	41.9447	0.891718	0.453384	1.63502	0.147315	1.92653	2.55116				OSMI-1	0.00074595
Fig. 2K.		Treatment	Drug	IgE		ELISA	Treatment	Drug	IgM
	Expt.1	-Cytokine	DMSO	0.0218		Mean	-Cytokine	DMSO	0.02505
		+Cytokine	DMSO	0.3815			+Cytokine	DMSO	0.914917
			Thiamet G	0.17085				Thiamet G	0.53435
			OSMI-1	0.1395				OSMI-1	0.08185
	Expt.2	-Cytokine	DMSO	0.02145		SD	-Cytokine	DMSO	0.00593485
		+Cytokine	DMSO	1.5625			+Cytokine	DMSO	0.59872
			Thiamet G	0.9413				Thiamet G	0.387058
			OSMI-1	0.0662				OSMI-1	0.0516355
	Expt.3	-Cytokine	DMSO	0.0319		T.Test (vs.+Cytokine DMSO)	-Cytokine	DMSO	0.061705
		+Cytokine	DMSO	0.80075			+Cytokine	DMSO
			Thiamet G	0.4909				Thiamet G	0.407518
			OSMI-1	0.03985				OSMI-1	0.0742689
	Average	-Cytokine	DMSO	0.02505
		+Cytokine	DMSO	0.914917
			Thiamet G	0.53435
			OSMI-1	0.08185
	STDEV	-Cytokine	DMSO	0.00593485
		+Cytokine	DMSO	0.59872
			Thiamet G	0.387058
			OSMI-1	0.0516355
[truncated: 7 more columns]

## Sheet: Fig. 3A-B.
CH12F3-2A cells
Fig. 3A		% of IgM- IgA+				% of IgM- IgA+
	-Cytokine 1	2.13		Mean	-Cytokine	2.11333
	-Cytokine 2	2.02			+Cytokine	12.44
	-Cytokine 3	2.19		SD	-Cytokine	0.0862168
	+Cytokine 1	12.49			+Cytokine	0.526783
	+Cytokine 2	12.94			T.Test	4.7313e-06
	+Cytokine 3	11.89
Fig. 3B	mean Cq	Gapdh	Prdm1	Irf4	Sdc1		ΔCq	Prdm1	Irf4	Sdc1		ΔCq expression	Prdm1	Irf4	Sdc1		ΔΔCq	Prdm1	Irf4	Sdc1			Drug	Prdm1	Irf4	Sdc1
	-Cytokine 1	17.39	23.7867	21.87	50.605		-Cytokine 1	6.39667	4.48	33.215		-Cytokine 1	0.0118689	0.0448111	1.00297e-10		-Cytokine 1	1	1	1		Mean	-Cytokine	0.939599	1.01093	0.56995
	-Cytokine 2	17.105	23.7017	21.465	51.799		-Cytokine 2	6.59667	4.36	34.694		-Cytokine 2	0.0103325	0.0486978	3.59803e-11		-Cytokine 2	0.870551	1.08673	0.358737			+Cytokine	1.51089	2.24543	2.06623
	-Cytokine 3	17.285	23.7583	21.845	52.01		-Cytokine 3	6.47333	4.56	34.725		-Cytokine 3	0.0112547	0.0423939	3.52155e-11		-Cytokine 3	0.948246	0.946058	0.351111		SD	-Cytokine	0.0651565	0.0709728	0.372454
	+Cytokine 1	17.095	23.05	20.665	49.335		+Cytokine 1	5.955	3.57	32.24		+Cytokine 1	0.01612	0.0842021	1.97148e-10		+Cytokine 1	1.35817	1.87905	1.96564			+Cytokine	0.233552	0.31908	0.134604
	+Cytokine 2	17.115	23.0317	20.335	49.18		+Cytokine 2	5.91667	3.22	32.065		+Cytokine 2	0.0165541	0.107321	2.22573e-10		+Cytokine 2	1.39474	2.39496	2.21914			T.Test	0.0150873	0.00282279	0.00281849
	+Cytokine 3	17.725	23.29	20.905	49.93		+Cytokine 3	5.565	3.18	32.205		+Cytokine 3	0.0211236	0.110338	2.0199e-10		+Cytokine 3	1.77974	2.46229	2.01391

## Sheet: Fig. 3D-E.
CH12F3-2A cells
															Normalized to -Cytokine DMSO		Normalized to +Cytokine DMSO		Protein	Treatment	Drug	O-GlcNAc(RL2)	IgM	IgA
Fig. 3D.		Treatment	Drug	β-actin	O-GlcNAC(RL2)	IgM	IgA			Treatment	Drug	O-GlcNAc(RL2)/β-actin	IgM/β-actin	IgA/β-actin	O-GlcNAc(RL2)	IgM	IgA		Average	-Cytokine	DMSO	1	1	0
	Expt.1	-Cytokine	DMSO	43.5	0.0545	20.7	0		Expt.1	-Cytokine	DMSO	0.00125287	0.475862	0	1	1	0			+Cytokine	DMSO	1.8273	1.46743	1
		+Cytokine	DMSO	45.1	0.105	41.3	0.0254			+Cytokine	DMSO	0.00232816	0.915743	0.000563193	1.85826	1.92439	1				Thiamet G	2.59373	1.53006	1.1472
			Thiamet G	44.1	0.142	45.6	0.0225				Thiamet G	0.00321995	1.03401	0.000510204	2.57006	2.17293	0.905914				OSMI-1	1.09464	0.692178	0.3859
			OSMI-1	40.2	0.0581	17.8	0.00524				OSMI-1	0.00144527	0.442786	0.000130348	1.15357	0.930492	0.231445		STDEV	-Cytokine	DMSO	0	0	0
	Expt.2	-Cytokine	DMSO	50.2	1.49	33.5			Expt.2	-Cytokine	DMSO	0.0296813	0.667331	0	1	1	0			+Cytokine	DMSO	0.108166	0.418687	0
		+Cytokine	DMSO	45	2.28	33.1	0.0717			+Cytokine	DMSO	0.0506667	0.735556	0.00159333	1.70702	1.10224	1				Thiamet G	0.0645798	0.577005	0.300933
			Thiamet G	48.2	3.64	34	0.114				Thiamet G	0.0755187	0.705394	0.00236515	2.54432	1.05704	1.4844				OSMI-1	0.0543114	0.206413	0.164601
			OSMI-1	42.9	1.38	16.5	0.0251				OSMI-1	0.0321678	0.384615	0.000585082	1.08378	0.576349	0.367206		T.Test (vs. +Cytokine DMSO)	-Cytokine	DMSO	0.00564998	0.192833	0.00116596
	Expt.3	-Cytokine	DMSO	61.7	0.338	41.3	0		Expt.3	-Cytokine	DMSO	0.00547812	0.669368	0	1	1	0			+Cytokine	DMSO
		+Cytokine	DMSO	82.1	0.862	75.6	0.0654			+Cytokine	DMSO	0.0104994	0.920828	0.00079659	1.9166	1.37567	1				Thiamet G	0.00124502	0.887086	0.280455
			Thiamet G	97.2	1.42	88.5	0.0814				Thiamet G	0.0146091	0.910494	0.000837449	2.6668	1.36023	1.05129				OSMI-1	0.000467822	0.0451702	0.00295351
			OSMI-1	75	0.43	28.6	0.0334				OSMI-1	0.00573333	0.381333	0.000445333	1.04659	0.569692	0.55905
													Treatment	Drug	O-GlcNAc(RL2)	IgM	IgA
												Average	-Cytokine	DMSO	1	1	0
													+Cytokine	DMSO	1.8273	1.46743	1
														Thiamet G	2.59373	1.53006	1.1472
														OSMI-1	1.09464	0.692178	0.3859
												STDEV	-Cytokine	DMSO	0	0	0
													+Cytokine	DMSO	0.108166	0.418687	0
														Thiamet G	0.0645798	0.577005	0.300933
														OSMI-1	0.0543114	0.206413	0.164601
Fig. 3E		Treatment	Drug	IgA		ELISA	Treatment	Drug	IgM
	Expt.1	-Cytokine	DMSO	0.166		Mean	-Cytokine	DMSO	0.121333
		+Cytokine	DMSO	0.65			+Cytokine	DMSO	0.639333
			Thiamet G	0.907				Thiamet G	0.690667
			OSMI-1	0.301				OSMI-1	0.280333
	Expt.2	-Cytokine	DMSO	0.103		SD	-Cytokine	DMSO	0.0388887
		+Cytokine	DMSO	0.696			+Cytokine	DMSO	0.0626844
			Thiamet G	0.703				Thiamet G	0.222756
			OSMI-1	0.268				OSMI-1	0.0180093
	Expt.3	-Cytokine	DMSO	0.095		T.Test (vs.+Cytokine DMSO)	-Cytokine	DMSO	0.000262259
		+Cytokine	DMSO	0.572			+Cytokine	DMSO
			Thiamet G	0.462				Thiamet G	0.720366
			OSMI-1	0.272				OSMI-1	0.000675862

## Sheet: Fig. 3F-K.
CH12F3-2A cells
Fig. 3F.	Treatment	Drug	Cell number (x106 cells/ml)	% of PI+ cells			Treatment	Drug	Cell number (x106 cells/ml)	% of PI+ cells
	-Cytokine	DMSO 1	0.64	3.49		Mean	-Cytokine	DMSO	0.685333	4.08
		DMSO 2	0.695	4.45				OSMI-1	0.566667	10.2467
		DMSO 3	0.721	4.3			+Cytokine	DMSO	1.66667	11.1367
		OSMI-1 1	0.57	10.41				OSMI-1	0.966667	26.0667
		OSMI-1 2	0.52	10.16		SD	-Cytokine	DMSO	0.0413562	0.51643
		OSMI-1 3	0.61	10.17				OSMI-1	0.0450925	0.141539
	+Cytokine	DMSO 1	1.6	11.76			+Cytokine	DMSO	0.057735	0.825853
		DMSO 2	1.7	11.45				OSMI-1	0.057735	1.36873
		DMSO 3	1.7	10.2		T.Test (vs. +Cytokine DMSO)	-Cytokine	DMSO	1.80758e-05	0.000232077
		OSMI-1 1	1	27.21				OSMI-1	0.0283249	3.72753e-05	vs. -Cytokine DMSO
		OSMI-1 2	1	24.55			+Cytokine	DMSO
		OSMI-1 3	0.9	26.44				OSMI-1	0.000119761	8.54331e-05
											Normalized to -Cytokine DMSO			Protein	Treatment	Drug	c-Myc	O-GlcNAc(RL2)
Fig. 3G.	Treatment	Drug	β-actin	c-Myc	O-GlcNAc(RL2)		Treatment	Drug	c-Myc/β-actin	O-GlcNAc(RL2)/β-actin	c-Myc	O-GlcNAc(RL2)		Mean	-Cytokine	DMSO	1	1
	-Cytokine	DMSO 1	1.04461	1.23021	1.03618		-Cytokine	DMSO 1	1.17767	0.991936	1	1				OSMI-1	0.434857	0.455061
		DMSO 2	1.14854	1.31541	1.2708			DMSO 2	1.14528	1.10644	1	1			+Cytokine	DMSO	1.2307	1.61001
		DMSO 3	1.04761	0.992367	0.523755			DMSO 3	0.947264	0.49995	1	1				OSMI-1	0.80694	0.760254
		OSMI-1 1	1.05283	0.580943	0.543655			OSMI-1 1	0.551794	0.516377	0.468545	0.520575		SD	-Cytokine	DMSO	0	0
		OSMI-1 2	0.892655	0.47426	0.419518			OSMI-1 2	0.531291	0.469967	0.463895	0.424755				OSMI-1	0.0543717	0.0567899
		OSMI-1 3	0.961555	0.338955	0.201836			OSMI-1 3	0.352507	0.209905	0.372132	0.419852			+Cytokine	DMSO	0.0266666	0.166968
	+Cytokine	DMSO 1	0.952372	1.38775	1.41613		+Cytokine	DMSO 1	1.45716	1.48695	1.23732	1.49903				OSMI-1	0.149614	0.189771
		DMSO 2	1.06653	1.53104	2.1265			DMSO 2	1.43553	1.99385	1.25343	1.80204		T.Test (vs. +Cytokine DMSO)	-Cytokine	DMSO	0.000115568	0.00319178
		DMSO 3	1.13484	1.29144	0.867484			DMSO 3	1.13799	0.764409	1.20134	1.52897				OSMI-1	5.59612e-05	7.67702e-05	vs. -Cytokine DMSO
		OSMI-1 1	0.847943	0.976113	0.788313			OSMI-1 1	1.15116	0.929678	0.977482	0.937236			+Cytokine	DMSO
		OSMI-1 2	1.16555	0.931449	0.722013			OSMI-1 2	0.799146	0.619459	0.697771	0.559866				OSMI-1	0.00846373	0.00433212
		OSMI-1 3	0.842513	0.595025	0.330089			OSMI-1 3	0.70625	0.391791	0.745568	0.783659
Fig. 3H.	Treatment	Drug	Gapdh	Ccnd3	Lef1		ΔCq	Drug	Ccnd3	Lef1		ΔCq expression	Drug	Ccnd3	Lef1		ΔΔCq	Drug	Ccnd3	Lef1			Treatment	Drug	Ccnd3	Lef1
	-Cytokine	DMSO 1	18.455	25.005	26.96		-Cytokine	DMSO 1	6.55	8.505		-Cytokine	DMSO 1	0.0106722	0.00275258		-Cytokine	DMSO 1	1	1		Mean	-Cytokine	DMSO	0.882601	1.12285
		DMSO 2	18.565	25.25	27.02			DMSO 2	6.685	8.455			DMSO 2	0.00971884	0.00284965			DMSO 2	0.91067	1.03526				OSMI-1	0.799781	0.678719
		DMSO 3	18.63	25.62	26.72			DMSO 3	6.99	8.09			DMSO 3	0.00786684	0.00367001			DMSO 3	0.737135	1.3333			+Cytokine	DMSO	2.69916	2.42641
		OSMI-1 1	19.265	26.11	28.58			OSMI-1 1	6.845	9.315			OSMI-1 1	0.00869861	0.00157002			OSMI-1 1	0.815072	0.570382				OSMI-1	2.34178	1.12404
		OSMI-1 2	19	26.1	28.17			OSMI-1 2	7.1	9.17			OSMI-1 2	0.00728932	0.00173602			OSMI-1 2	0.68302	0.630689		SD	-Cytokine	DMSO	0.133662	0.183101
		OSMI-1 3	19.275	25.975	28.04			OSMI-1 3	6.7	8.765			OSMI-1 3	0.00961832	0.00229865			OSMI-1 3	0.90125	0.835088				OSMI-1	0.109916	0.138736
	+Cytokine	DMSO 1	18.525	23.58	26.01		+Cytokine	DMSO 1	5.055	7.485		+Cytokine	DMSO 1	0.0300811	0.00558201		+Cytokine	DMSO 1	2.81864	2.02792			+Cytokine	DMSO	0.113134	0.347522
		DMSO 2	18.93	24.105	26.02			DMSO 2	5.175	7.09			DMSO 2	0.0276802	0.00734002			DMSO 2	2.59368	2.6666				OSMI-1	0.104363	0.13861
		DMSO 3	18.735	23.86	25.87			DMSO 3	5.125	7.135			DMSO 3	0.0286564	0.00711461			DMSO 3	2.68515	2.58471		T.Test (vs. +Cytokine DMSO)	-Cytokine	DMSO	5.63997e-05	0.00454141
		OSMI-1 1	19.115	24.475	27.26			OSMI-1 1	5.36	8.145			OSMI-1 1	0.0243489	0.00353273			OSMI-1 1	2.28153	1.28343				OSMI-1	0.453738	0.0286051	vs. -Cytokine DMSO
		OSMI-1 2	18.835	24.195	27.26			OSMI-1 2	5.36	8.425			OSMI-1 2	0.0243489	0.00290953			OSMI-1 2	2.28153	1.05702			+Cytokine	DMSO
		OSMI-1 3	18.56	23.81	27.02			OSMI-1 3	5.25	8.46			OSMI-1 3	0.026278	0.00283979			OSMI-1 3	2.46229	1.03168				OSMI-1	0.015844	0.00381422
Fig. 3J-K.	Treatment	Drug	Gapdh	Germline IgA	Post-CSR IgA	IgM		ΔCq	Drug	Germline IgA	Post-CSR IgA	IgM		ΔCq expression	Drug	Germline IgA	Post-CSR IgA	IgM		ΔΔCq	Drug	Germline IgA	Post-CSR IgA	IgM			Treatment	Drug	Germline IgA	Post-CSR IgA	IgM
	-Cytokine	DMSO 1	17.21	41.03	35.52	21.8367		-Cytokine	DMSO 1	23.82	18.31	4.62667		-Cytokine	DMSO 1	6.75251e-08	3.07709e-06	0.0404794		-Cytokine	DMSO 1	1	1	1		Mean	-Cytokine	DMSO	2.00636	0.994869	0.96571
		DMSO 2	17.3	39.56	35.47	22.1117			DMSO 2	22.26	18.17	4.81167			DMSO 2	1.991e-07	3.39067e-06	0.0356077			DMSO 2	2.94854	1.10191	0.879649				OSMI-1	3.66357	1.01497	0.951853
		DMSO 3	17.57	40.34	36.06	22.1717			DMSO 3	22.77	18.49	4.60167			DMSO 3	1.39813e-07	2.71616e-06	0.041187			DMSO 3	2.07053	0.882703	1.01748			+Cytokine	DMSO	4.83799	8.7853	1.07901
		OSMI-1 1	17.81	39.9	36.37	22.7667			OSMI-1 1	22.09	18.56	4.95667			OSMI-1 1	2.24e-07	2.58752e-06	0.0322029			OSMI-1 1	3.31728	0.840896	0.795536				OSMI-1	2.68718	4.4815	0.528586
		OSMI-1 2	18.02	40.16	36.21	22.7933			OSMI-1 2	22.14	18.19	4.77333			OSMI-1 2	2.16369e-07	3.34399e-06	0.0365665			OSMI-1 2	3.20428	1.08673	0.903335		SD	-Cytokine	DMSO	0.975853	0.109691	0.0750413
		OSMI-1 3	18.23	39.89	36.38	22.6467			OSMI-1 3	21.66	18.15	4.41667			OSMI-1 3	3.0178e-07	3.438e-06	0.0468221			OSMI-1 3	4.46915	1.11729	1.15669				OSMI-1	0.699937	0.151527	0.1854
	+Cytokine	DMSO 1	17.31	38.89	32.7	22.4467		+Cytokine	DMSO 1	21.58	15.39	5.13667		+Cytokine	DMSO 1	3.18987e-07	2.32889e-05	0.0284256		+Cytokine	DMSO 1	4.72397	7.56846	0.702222			+Cytokine	DMSO	0.467268	1.14802	0.327049
		DMSO 2	17.4	39.07	32.55	21.66			DMSO 2	21.67	15.15	4.26			DMSO 2	2.99695e-07	2.7504e-05	0.052193			DMSO 2	4.43828	8.9383	1.28937				OSMI-1	0.848223	0.401274	0.0616187
		DMSO 3	17.63	39.03	32.64	21.94			DMSO 3	21.4	15.01	4.31			DMSO 3	3.61375e-07	3.03068e-05	0.0504151			DMSO 3	5.35171	9.84916	1.24545		T.Test (vs. +Cytokine DMSO)	-Cytokine	DMSO	0.010553	0.000305135	0.590042
		OSMI-1 1	17.71	40.54	34.01	23.465			OSMI-1 1	22.83	16.3	5.755			OSMI-1 1	1.34117e-07	1.2394e-05	0.0185171			OSMI-1 1	1.98618	4.02782	0.457444				OSMI-1	0.0751551	0.861392	0.589435
		OSMI-1 2	17.55	39.51	33.65	23.005			OSMI-1 2	21.96	16.1	5.455			OSMI-1 2	2.45121e-07	1.4237e-05	0.0227972			OSMI-1 2	3.63008	4.62675	0.563179			+Cytokine	DMSO
		OSMI-1 3	17.45	39.98	33.5	22.9			OSMI-1 3	22.53	16.05	5.45			OSMI-1 3	1.65118e-07	1.4739e-05	0.0228763			OSMI-1 3	2.44528	4.78991	0.565135				OSMI-1	0.0183523	0.00358949	0.0457139

## Sheet: Fig. 4D-F.
CH12F3-2A cells
Fig. 4D	Mean Cq	GAPDH	Pou2f1	Pou2af1		ΔCq	Pou2f1	Pou2af1		ΔCq expression	Pou2f1	Pou2af1		ΔΔCq	Pou2f1	Pou2af1				Pou2f1	Pou2af1
	DMSO 1	18.14	23.89	21.01		DMSO 1	5.75	2.87		DMSO 1	0.0185814	0.136787		DMSO 1	1	1		Mean	DMSO	0.936257	0.96189
	DMSO 2	18.16	24.05	21.13		DMSO 2	5.89	2.97		DMSO 2	0.0168629	0.127627		DMSO 2	0.907519	0.933033			Thiamet G	1.00509	1.10235
	DMSO 3	18.14	24.04	21.08		DMSO 3	5.9	2.94		DMSO 3	0.0167465	0.130308		DMSO 3	0.90125	0.952638			OSMI-1	1.07485	1.15277
	Thiamet G 1	18.24	24.09	21.11		Thiamet G 1	5.85	2.87		Thiamet G 1	0.017337	0.136787		Thiamet G 1	0.933033	1		SD	DMSO	0.0552924	0.0344289
	Thiamet G 2	18.38	23.98	21.1		Thiamet G 2	5.6	2.72		Thiamet G 2	0.0206173	0.151774		Thiamet G 2	1.10957	1.10957			Thiamet G	0.0926288	0.0989371
	Thiamet G 3	18.24	24.03	20.85		Thiamet G 3	5.79	2.61		Thiamet G 3	0.0180733	0.163799		Thiamet G 3	0.972655	1.19748			OSMI-1	0.133196	0.252328
	OSMI-1 1	18.23	24.07	21.3		OSMI-1 1	5.84	3.07		OSMI-1 1	0.0174576	0.11908		OSMI-1 1	0.939523	0.870551		T.Test (vs. DMSO)	DMSO
	OSMI-1 2	18.37	23.85	20.8		OSMI-1 2	5.48	2.43		OSMI-1 2	0.0224056	0.185565		OSMI-1 2	1.20581	1.3566			Thiamet G	0.331108	0.0809268
	OSMI-1 3	18.23	23.87	20.8		OSMI-1 3	5.64	2.57		OSMI-1 3	0.0200535	0.168404		OSMI-1 3	1.07923	1.23114			OSMI-1	0.171335	0.264012
									Normalized to DMSO
Fig. 4F		β-actin	OCT-1	OCA-B			OCT-1/β-actin	OCA-B/β-actin	OCT-1	OCA-B				OCT-1	OCA-B
	DMSO 1	0.244	229	0.838		DMSO 1	938.525	3.43443	1	1		Mean	DMSO	1	1
	DMSO 2	0.359	205	0.8992		DMSO 2	571.031	2.50474	1	1			Thiamet G	0.95228	0.895975
	DMSO 3	25.8	15	0.303		DMSO 3	0.581395	0.0117442	1	1			OSMI-1	0.270218	0.217313
	Thiamet G 1	0.306	215	0.871		Thiamet G 1	702.614	2.84641	0.748637	0.828786		SD	DMSO	0	0
	Thiamet G 2	0.449	328	1.164		Thiamet G 2	730.512	2.59243	1.27929	1.03501			Thiamet G	0.286027	0.120431
	Thiamet G 3	24.9	12	0.241		Thiamet G 3	0.481928	0.00967871	0.828916	0.824128			OSMI-1	0.0584058	0.109408
	OSMI-1 1	0.289	55	0.341		OSMI-1 1	190.311	1.17993	0.202777	0.34356		T.Test (vs. DMSO)	DMSO
	OSMI-1 2	0.386	67	0.153		OSMI-1 2	173.575	0.396373	0.303968	0.158249			Thiamet G	0.786962	0.208961
	OSMI-1 3	26.6	4.7	0.0469		OSMI-1 3	0.176692	0.00176316	0.30391	0.15013			OSMI-1	2.69652e-05	0.000243853
									OCT-1	OCA-B
							Average	DMSO	1	1
								Thiamet G	0.95228	0.895975
								OSMI-1	0.270218	0.217313
							STDEV	DMSO	0	0
								Thiamet G	0.286027	0.120431
								OSMI-1	0.0584058	0.109408

## Sheet: Fig. 4H-J.
CH12F3-2A cells
Fig. 4H.															Normalized to siNC
		Condition	β-actin	OGT	O-GlcNAc(RL2)	OCT-1	OCA-B			Condition	OGT/β-actin	O-GlcNAc(RL2)/β-actin	OCT-1/β-actin	OCA-B/β-actin	OGT	O-GlcNAc(RL2)	OCT-1	OCA-B		Protein	Condition	OGT	O-GlcNAc(RL2)	OCT-1	OCA-B
	Expt. 1	siNC	2.7917	1.47189	0.977418	2.39619	3.70414		Expt. 1	siNC	0.527236	0.350116	0.858326	1.32684	1	1	1	1		Mean	siNC	1	1	1	1
		siOGT	1.73288	0.314635	0.208018	0.854329	0.337454			siOGT	0.181568	0.120042	0.493012	0.194736	0.344376	0.342864	0.574387	0.146767			siOGT	0.330441	0.469974	0.378321	0.211547
	Expt. 2	siNC	1.57923	1.27106	1.84855	0.555984	2.83412		Expt. 2	siNC	0.80486	1.17054	0.35206	1.79462	1	1	1	1		SD	siNC	0	0	0	0
		siOGT	1.1739	0.403745	0.839474	0.152698	0.575835			siOGT	0.343936	0.715118	0.130078	0.490533	0.427324	0.610932	0.369477	0.273335			siOGT	0.10455	0.134569	0.191798	0.063337
	Expt. 3	siNC	1.20194	1.68332	2.24599	0.667757	3.25795		Expt. 3	siNC	1.4005	1.86864	0.555566	2.71058	1	1	1	1		T.Test (vs. siNC)	siNC
		siOGT	1.28298	0.394622	1.09353	0.136211	0.746088			siOGT	0.307582	0.852334	0.106167	0.581526	0.219622	0.456126	0.191098	0.21454			siOGT	0.000375727	0.0024139	0.00494675	2.73675e-05
														Condition	OGT	O-GlcNAc(RL2)	OCT-1	OCA-B
													Average	siNC	1	1	1	1
														siOGT	0.330441	0.469974	0.378321	0.211547
													STDEV	siNC	0	0	0	0
														siOGT	0.10455	0.134569	0.191798	0.063337
Naive B cell (CD43- CD11b-)
CD40L/IL-4/IL-21													Normalized to +Cytokine DMSO
Fig. 4J.		Treatment	Drug	β-actin	OCT-1				Treatment	Drug	OCT-1/β-actin	OCA-B/β-actin	OCT-1	OCA-B		Protein	Treatment	Drug	OCT-1	OCA-B
	Expt.1	-Cytokine	DMSO	0.871	0.0289			Expt.1	-Cytokine	DMSO	0.0331803	0.0250789	0.480734	0.12836		Mean	-Cytokine	DMSO	1.05795	0.156425
		+Cytokine	DMSO	0.949	0.0655				+Cytokine	DMSO	0.06902	0.19538	1	1			+Cytokine	DMSO	1	1
			Thiamet G	0.703	0.076					Thiamet G	0.108108	0.174459	1.56633	0.892923				Thiamet G	1.80682	0.659277
			OSMI-1	0.608	0.018					OSMI-1	0.0296053	0.0244541	0.428937	0.125162				OSMI-1	0.326634	0.106393
	Expt.2	-Cytokine	DMSO	0.712	0.0839			Expt.2	-Cytokine	DMSO	0.117837	0.0535519	1.15873	0.157605		SD	-Cytokine	DMSO	1.34656	0.170458
		+Cytokine	DMSO	0.826	0.084				+Cytokine	DMSO	0.101695	0.339785	1	1			+Cytokine	DMSO	1	1
			Thiamet G	0.752	0.122					Thiamet G	0.162234	0.256376	1.5953	0.754524				Thiamet G	1.63736	0.413778
			OSMI-1	0.894	0.0209					OSMI-1	0.0233781	0.0518349	0.229884	0.152552				OSMI-1	0.516988	0.398005
	Expt.3	-Cytokine	DMSO	0.942	0.0803			Expt.3	-Cytokine	DMSO	0.0852442	0.0703264	1.53439	0.18331		T.Test (vs.+Cytokine DMSO)	-Cytokine	DMSO	0.860051	7.50489e-07
		+Cytokine	DMSO	1.08	0.06				+Cytokine	DMSO	0.0555556	0.383648	1	1			+Cytokine	DMSO
			Thiamet G	1.02	0.128					Thiamet G	0.12549	0.126752	2.25882	0.330385				Thiamet G	0.0234279	0.114358
			OSMI-1	1.11	0.0198					OSMI-1	0.0178378	0.0159076	0.321081	0.041464				OSMI-1	0.000304678	1.162e-05
		Treatment	Drug	β-actin	OCA-B						Treatment	Drug	OCT-1	OCA-B
	Expt.1	-Cytokine	DMSO	0.317	0.00795					Average	-Cytokine	DMSO	1.05795	0.156425
		+Cytokine	DMSO	0.303	0.0592						+Cytokine	DMSO	1	1
			Thiamet G	0.231	0.0403							Thiamet G	1.80682	0.659277
			OSMI-1	0.229	0.0056							OSMI-1	0.326634	0.106393
	Expt.2	-Cytokine	DMSO	0.366	0.0196					STDEV	-Cytokine	DMSO	1.34656	0.170458
		+Cytokine	DMSO	0.279	0.0948						+Cytokine	DMSO	1	1
			Thiamet G	0.298	0.0764							Thiamet G	1.63736	0.413778
			OSMI-1	0.218	0.0113							OSMI-1	0.516988	0.398005
	Expt.3	-Cytokine	DMSO	0.337	0.0237
		+Cytokine	DMSO	0.318	0.122
			Thiamet G	0.471	0.0597
			OSMI-1	0.303	0.00482

## Sheet: Fig.5B-C
CH12F3-2A cells
Fig.5B.			β-actin	GFP	OCA-B FLAG				GFP/β-actin	OCA-B FLAG/(GFP/β-actin)	Normalized to OCA-B WT		Protein		OCA-B FLAG/(GFP/β-actin)
	Expt.1	Empty Vector	6.25	0	0		Expt.1	Empty Vector	0	0			Mean	Empty Vector
		pEGFP	7.11	18.9	0			pEGFP	2.65823	0				pEGFP
		OCA-B WT	4.84	10.6	1.53			OCA-B WT	2.19008	0.698604	1			OCA-B WT	1
		OCA-B S130A	4.4	22.4	0.308			OCA-B S130A	5.09091	0.0605	0.0866013			OCA-B S130A	0.092603
	Expt.2	Empty Vector	70.1	0	0		Expt.2	Empty Vector	0	0			SD	Empty Vector
		pEGFP	45.9	45.2	0			pEGFP	0.984749	0				pEGFP
		OCA-B WT	53.6	11.7	0.128			OCA-B WT	0.218284	0.586393	1			OCA-B WT	0
		OCA-B S130A	60.5	22.9	0.0185			OCA-B S130A	0.378512	0.0488755	0.0833494			OCA-B S130A	0.013311
	Expt.3	Empty Vector	57	0	0		Expt.3	Empty Vector	0	0			T.Test (vs.OCA-B WT)	Empty Vector
		pEGFP	56.4	20.1	0			pEGFP	0.356383	0				pEGFP
		OCA-B WT	32.9	6.96	0.0856			OCA-B WT	0.21155	0.404632	1			OCA-B WT
		OCA-B S130A	47	11.2	0.0104			OCA-B S130A	0.238298	0.0436429	0.107858			OCA-B S130A	7.17233e-05
											OCA-B FLAG
									Average	Empty Vector
										pEGFP
										OCA-B WT	1
										OCA-B S130A	0.092603
									STDEV	Empty Vector
										pEGFP
										OCA-B WT	0
										OCA-B S130A	0.013311
Fig. 5C.	mean Cq	Gapdh	OCA-B FLAG		ΔCq	OCA-B FLAG		ΔCq expression	OCA-B FLAG		ΔΔCq	OCA-B FLAG				OCA-B FLAG
	OCA-B WT 1	24.09	25.98		OCA-B WT 1	1.89		OCA-B WT 1	0.269807		OCA-B WT 1	1		Mean	OCA-B WT	0.928271
	OCA-B WT 2	24	25.72		OCA-B WT 2	1.72		OCA-B WT 2	0.303549		OCA-B WT 2	1.12506			OCA-B S130A	0.715254
	OCA-B WT 3	23.8	26.29		OCA-B WT 3	2.49		OCA-B WT 3	0.178006		OCA-B WT 3	0.659754		SD	OCA-B WT	0.240803
	OCA-B S130A 1	24.1	26.05		OCA-B S130A 1	1.95		OCA-B S130A 1	0.258816		OCA-B S130A 1	0.959264			OCA-B S130A	0.229597
	OCA-B S130A 2	23.21	26.09		OCA-B S130A 2	2.88		OCA-B S130A 2	0.135842		OCA-B S130A 2	0.503478		T.Test (vs. OCA-B WT)	OCA-B WT
	OCA-B S130A 3	23.87	26.31		OCA-B S130A 3	2.44		OCA-B S130A 3	0.184284		OCA-B S130A 3	0.68302			OCA-B S130A	0.329776

## Sheet: Fig.5D-E.
CH12F3-2A cells
Fig. 5D	Mean Cq	Drug	Gapdh	Prdm1	Irf4	Sdc1	Bcl6		ΔCq	Drug	Prdm1	Irf4	Sdc1	Bcl6		ΔCq expression	Drug	Prdm1	Irf4	Sdc1	Bcl6		ΔΔCq	Drug	Prdm1	Irf4	Sdc1	Bcl6				Drug	Prdm1	Irf4	Sdc1	Bcl6
	-Cytokine	DMSO 1	18.86	25.2567	23.34	51.54	31.6567		-Cytokine	DMSO 1	6.39667	4.48	32.68	12.7967		-Cytokine	DMSO 1	0.0118689	0.0448111	1.45325e-10	0.000140546		-Cytokine	DMSO 1	1	1	1	1		Mean	-Cytokine	DMSO	0.953402	1.01093	1.44047	1.06132
		DMSO 2	18.93	25.5267	23.29	50.651	31.6767			DMSO 2	6.59667	4.36	31.721	12.7467			DMSO 2	0.0103325	0.0486978	2.82506e-10	0.000145503			DMSO 2	0.870551	1.08673	1.94396	1.03526				OSMI-1	0.777458	0.796019	1.44175	1.36944
		DMSO 3	18.82	25.2317	23.38	51.038	31.4167			DMSO 3	6.41167	4.56	32.218	12.5967			DMSO 3	0.0117462	0.0423939	2.00178e-10	0.000161445			DMSO 3	0.989657	0.946058	1.37745	1.1487			+Cytokine	DMSO	1.4413	2.24543	2.34084	1.09386
		OSMI-1 1	19.34	25.9017	23.93	51.198	31.4917			OSMI-1 1	6.56167	4.59	31.858	12.1517			OSMI-1 1	0.0105862	0.0415214	2.56913e-10	0.000219778			OSMI-1 1	0.891929	0.926588	1.76786	1.56374				OSMI-1	0.952219	1.04758	0.86658	1.03734
		OSMI-1 2	18.8	25.7933	24.01	51.04	31.2033			OSMI-1 2	6.99333	5.21	32.24	12.4033			OSMI-1 2	0.00784868	0.0270168	1.97148e-10	0.000184597			OSMI-1 2	0.66128	0.602904	1.3566	1.31342		SD	-Cytokine	DMSO	0.0719379	0.0709728	0.475126	0.0776981
		OSMI-1 3	19.86	26.6167	24.56	52.276	32.3567			OSMI-1 3	6.75667	4.7	32.416	12.4967			OSMI-1 3	0.00924785	0.0384733	1.74507e-10	0.000173033			OSMI-1 3	0.779165	0.858565	1.2008	1.23114				OSMI-1	0.115334	0.170666	0.292959	0.173228
	+Cytokine	DMSO 1	19.01	24.965	22.58	50.581	31.785		+Cytokine	DMSO 1	5.955	3.57	31.571	12.775		+Cytokine	DMSO 1	0.01612	0.0842021	3.1346e-10	0.000142673		+Cytokine	DMSO 1	1.35817	1.87905	2.15696	1.01513			+Cytokine	DMSO	0.113787	0.31908	0.161955	0.13131
		DMSO 2	18.9	24.8167	22.12	50.28	31.6667			DMSO 2	5.91667	3.22	31.38	12.7667			DMSO 2	0.0165541	0.107321	3.57832e-10	0.0001435			DMSO 2	1.39474	2.39496	2.46229	1.02101				OSMI-1	0.0640509	0.0300395	0.0252652	0.181829
		DMSO 3	18.66	24.405	21.84	50.075	31.14			DMSO 3	5.745	3.18	31.415	12.48			DMSO 3	0.0186459	0.110338	3.49255e-10	0.000175043			DMSO 3	1.57098	2.46229	2.40327	1.24545		T.Test(vs. +Cytokine DMSO)	-Cytokine	DMSO	0.00328789	0.00282279	0.0359857	0.730529
		OSMI-1 1	18.63	25.18	23.03	51.531	31.1083			OSMI-1 1	6.55	4.4	32.901	12.4783			OSMI-1 1	0.0106722	0.0473661	1.24684e-10	0.000175246			OSMI-1 1	0.899171	1.05702	0.857971	1.24689				OSMI-1	0.0884326	0.114291	0.997013	0.0482706	(vs. -Cytokine DMSO)
		OSMI-1 2	18.7	25.0633	23.16	51.62	31.615			OSMI-1 2	6.36333	4.46	32.92	12.915			OSMI-1 2	0.0121464	0.0454366	1.23053e-10	0.000129478			OSMI-1 2	1.02337	1.01396	0.846745	0.921251			+Cytokine	DMSO
		OSMI-1 3	18.61	25.105	22.99	51.45	31.49			OSMI-1 3	6.495	4.38	32.84	12.88			OSMI-1 3	0.0110869	0.0480273	1.30069e-10	0.000132658			OSMI-1 3	0.934111	1.07177	0.895025	0.943874				OSMI-1	0.0029107	0.00293395	9.91384e-05	0.684985
									Normalized to -Cytokine DMSO
Fig. 5E	Treatment	Drug	β-actin	OCA-B		Treatment	Drug	OCA-B/β-actin	OCA-B		Protein	Treatment	Drug	OCA-B
	-Cytokine	DMSO 1	1.04461	0.554		-Cytokine	DMSO 1	0.530342	1		Mean	-Cytokine	DMSO	1
		DMSO 2	1.14854	0.687			DMSO 2	0.598149	1				OSMI-1	0.560989
		DMSO 3	1.04761	0.183			DMSO 3	0.174683	1			+Cytokine	DMSO	1.39043
		OSMI-1 1	1.05283	0.302			OSMI-1 1	0.286847	0.540872				OSMI-1	0.762106
		OSMI-1 2	0.892655	0.311			OSMI-1 2	0.348399	0.582461		SD	-Cytokine	DMSO	0
		OSMI-1 3	0.961555	0.094			OSMI-1 3	0.0977583	0.559634				OSMI-1	0.020828
	+Cytokine	DMSO 1	0.952372	0.71		+Cytokine	DMSO 1	0.745507	1.40571			+Cytokine	DMSO	0.243103
		DMSO 2	1.06653	1.037			DMSO 2	0.972312	1.62553				OSMI-1	0.237519
		DMSO 3	1.13484	0.226			DMSO 3	0.199147	1.14005		T.Test (vs. +Cytokine DMSO)	-Cytokine	DMSO	0.0497313
		OSMI-1 1	0.847943	0.456			OSMI-1 1	0.537772	1.01401				OSMI-1	3.36068e-06	vs. -Cytokine DMSO
		OSMI-1 2	1.16555	0.509			OSMI-1 2	0.436702	0.730088			+Cytokine	DMSO
		OSMI-1 3	0.842513	0.0798			OSMI-1 3	0.0947166	0.542221				OSMI-1	0.0328371

## Sheet: Fig.5G-I.
CH12F3-2A cells
																			Normalized to -Cytokine siNC									OCA-B	IgM	IgA	O-GlcNAc(RL2)	c-Myc
Fig. 5G			Condition	GAPDH	OCA-B	IgM	IgA	O-GlcNAc(RL2)	c-Myc				Condition	OCA-B/GAPDH	IgM/GAPDH	IgA/GAPDH	O-GlcNAc(RL2)/GAPDH	c-Myc/GAPDH	OCA-B	IgM	IgA	O-GlcNAc(RL2)	c-Myc		Mean	-Cytokine	siNC	1	1	0.0800057	1	1
	Expt. 1	-Cytokine	siNC	1.1851	0.831067	0.849118	0.101558	0.88556	0.306677		Expt. 1	-Cytokine	siNC	0.701263	0.716495	0.0856955	0.747245	0.258777	1	1	0.0750522	1	1			+Cytokine	siNC	1.50309	1.84474	1	1.75004	3.67941
		+Cytokine	siNC	1.3234	1.50977	1.49991	1.51107	1.43344	1.10605			+Cytokine	siNC	1.14082	1.13337	1.14181	1.08315	0.835768	1.62681	1.58183	1	1.44953	3.22968				siOCA-B #1	0.644807	0.826355	0.285178	1.42652	2.74005
			siOCA-B #1	1.1154	0.440513	0.896572	0.318913	1.1656	0.846313				siOCA-B #1	0.394938	0.803812	0.285918	1.04501	0.758753	0.56318	1.12187	0.250408	1.39848	2.93207				siOCA-B #2	0.575824	1.12684	0.669258	1.35848	2.44443
			siOCA-B #2	1.2171	0.424896	0.962725	0.904155	1.09777	0.760184				siOCA-B #2	0.349105	0.791	0.742876	0.901957	0.624586	0.497824	1.10398	0.650612	1.20704	2.41361		SD	-Cytokine	siNC	0	0	0.0215684	0	0
	Expt. 2	-Cytokine	siNC	1.0694	0.732313	0.829025	0.144126	0.720901	0.295865		Expt. 2	-Cytokine	siNC	0.684789	0.775225	0.134773	0.674117	0.276664	1	1	0.10362	1	1			+Cytokine	siNC	0.301718	0.228214	0	0.269571	0.86934
		+Cytokine	siNC	0.9968	1.17631	1.53907	1.29649	1.22971	1.29105			+Cytokine	siNC	1.18008	1.54401	1.30065	1.23366	1.2952	1.72328	1.99169	1	1.83004	4.68148				siOCA-B #1	0.186332	0.285289	0.0419112	0.455991	0.493298
			siOCA-B #1	1.1543	0.678226	0.494424	0.410484	0.766618	0.992701				siOCA-B #1	0.587564	0.428333	0.355613	0.664141	0.860003	0.858022	0.552527	0.273412	0.985201	3.10847				siOCA-B #2	0.301571	0.0244985	0.139271	0.340913	0.75662
			siOCA-B #2	1.3013	0.809786	1.13371	0.914391	0.982072	1.15783				siOCA-B #2	0.62229	0.871212	0.702675	0.754685	0.889749	0.908733	1.12382	0.54025	1.11952	3.21599		T.Test(vs. +Cytokine siNC)	-Cytokine	siNC	0.0446497	0.0030411	2.01145e-07	0.00852808	0.00593175
	Expt. 3	-Cytokine	siNC	1.7011	1.0838	0.856955	0.134628	0.86786	0.295865		Expt. 3	-Cytokine	siNC	0.637116	0.503765	0.079142	0.510176	0.173926	1	1	0.0613449	1	1			+Cytokine	siNC
		+Cytokine	siNC	1.289	0.951967	1.27319	1.66296	1.29587	0.701055			+Cytokine	siNC	0.738531	0.987736	1.29011	1.00533	0.543875	1.15918	1.96071	1	1.97056	3.12706				siOCA-B #1	0.0137831	0.00847272	7.81857e-06	0.349782	0.17891
			siOCA-B #1	1.0359	0.338719	0.419918	0.443313	1.00196	0.392701				siOCA-B #1	0.32698	0.405366	0.42795	0.967236	0.379092	0.513219	0.804672	0.331715	1.89589	2.17962				siOCA-B #2	0.0196909	0.00562635	0.0146927	0.193664	0.13703
			siOCA-B #2	1.2076	0.246906	0.701243	1.2727	1.07746	0.35783				siOCA-B #2	0.20446	0.580691	1.05391	0.892232	0.296315	0.320915	1.1527	0.816913	1.74887	1.70369
																			OCA-B	IgM	IgA	O-GlcNAc(RL2)	c-Myc
																Average	-Cytokine	siNC	1	1	0.0800057	1	1
																	+Cytokine	siNC	1.50309	1.84474	1	1.75004	3.67941
																		siOCA-B #1	0.644807	0.826355	0.285178	1.42652	2.74005
																		siOCA-B #2	0.575824	1.12684	0.669258	1.35848	2.44443
																STDEV	-Cytokine	siNC	0	0	0.0215684	0	0
																	+Cytokine	siNC	0.301718	0.228214	0	0.269571	0.86934
																		siOCA-B #1	0.186332	0.285289	0.0419112	0.455991	0.493298
																		siOCA-B #2	0.301571	0.0244985	0.139271	0.340913	0.75662
Fig. 5H		Mean Cq	Gapdh	Prdm1			ΔCq	Prdm1			ΔCq expression	Prdm1			ΔΔCq	Prdm1					Prdm1
	-Cytokine	siNC 1	23.4	29.115		-Cytokine	siNC 1	5.715		-Cytokine	siNC 1	0.0190377		-Cytokine	siNC 1	1		Mean	-Cytokine	siNC	0.964073
		siNC 2	22.24	28.02			siNC 2	5.78			siNC 2	0.018199			siNC 2	0.955945			+Cytokine	siNC	1.44253
		siNC 3	25.145	30.955			siNC 3	5.81			siNC 3	0.0178244			siNC 3	0.936272				siOCA-B #1	0.876932
	+Cytokine	siNC 1	21.655	26.955		+Cytokine	siNC 1	5.3		+Cytokine	siNC 1	0.0253829		+Cytokine	siNC 1	1.3333				siOCA-B #2	1.03679
		siNC 2	21.215	26.43			siNC 2	5.215			siNC 2	0.0269233			siNC 2	1.41421		SD	-Cytokine	siNC	0.032632
		siNC 3	22.43	27.485			siNC 3	5.055			siNC 3	0.0300811			siNC 3	1.58008			+Cytokine	siNC	0.125805
		siOCA-B #1 1	20.375	26.295			siOCA-B #1 1	5.92			siOCA-B #1 1	0.0165159			siOCA-B #1 1	0.867539				siOCA-B #1	0.21282
		siOCA-B #1 2	21.285	27.58			siOCA-B #1 2	6.295			siOCA-B #1 2	0.0127355			siOCA-B #1 2	0.668964				siOCA-B #2	0.068064
		siOCA-B #1 3	23.125	28.71			siOCA-B #1 3	5.585			siOCA-B #1 3	0.0208328			siOCA-B #1 3	1.09429		T.Test(vs. +Cytokine siNC)	-Cytokine	siNC	0.00310332
		siOCA-B #2 1	23.675	29.3			siOCA-B #2 1	5.625			siOCA-B #2 1	0.0202631			siOCA-B #2 1	1.06437			+Cytokine	siNC
		siOCA-B #2 2	22.945	28.54			siOCA-B #2 2	5.595			siOCA-B #2 2	0.0206889			siOCA-B #2 2	1.08673				siOCA-B #1	0.0166415
		siOCA-B #2 3	22.92	28.695			siOCA-B #2 3	5.775			siOCA-B #2 3	0.0182621			siOCA-B #2 3	0.959264				siOCA-B #2	0.00796838
Fig. 5I			IgA		ELISA			IgA
	-Cytokine	siNC 1	0.1679		Mean	-Cytokine	siNC	0.179767
		siNC 2	0.1836			+Cytokine	siNC	0.623667
		siNC 3	0.1878				siOCA-B #1	0.292333
	+Cytokine	siNC 1	0.62775				siOCA-B #2	0.3825
		siNC 2	0.6612		SD	-Cytokine	siNC	0.0104892
		siNC 3	0.58205			+Cytokine	siNC	0.0397327
		siOCA-B #1 1	0.30155				siOCA-B #1	0.00985195
		siOCA-B #1 2	0.2935				siOCA-B #2	0.00668038
		siOCA-B #1 3	0.28195		T.Test(vs. +Cytokine siNC)	-Cytokine	siNC	4.80454e-05
		siOCA-B #2 1	0.38675			+Cytokine	siNC
		siOCA-B #2 2	0.38595				siOCA-B #1	0.000150202
		siOCA-B #2 3	0.3748				siOCA-B #2	0.000488626

[truncated: 7 more sheets: Fig.5J-M., Fig. 7., Fig. S1., Fig. S2., Fig. S4., Fig.S5A-B, Fig. S7B-C.]
